# Supplementary material for: Vitamin D status among adolescents in Kuwait: a cross-sectional study
Source: PubMed Central journal article supplement (PMC6074625; doi:10.1136/bmjopen-2017-021401), 2018-08-01
Supplement: bmjopen-2017-021401.draft_revisions.pdf [file bmjopen-2017-021401.draft_revisions.pdf]

# BMJ Open

BMJ Open is committed to open peer review. As part of this commitment we make the peer review history of every article we publish publicly available.

When an article is published we post the peer reviewers' comments and the authors' responses online. We also post the versions of the paper that were used during peer review. These are the versions that the peer review comments apply to.

The versions of the paper that follow are the versions that were submitted during the peer review process. They are not the versions of record or the final published versions. They should not be cited or distributed as the published version of this manuscript.

BMJ Open is an open access journal and the full, final, typeset and author-corrected version of record of the manuscript is available on our site with no access controls, subscription charges or pay-per-view fees (<http://bmjopen.bmj.com>).

If you have any questions on BMJ Open's open peer review process please email [info.bmjopen@bmj.com](mailto:info.bmjopen@bmj.com)

# BMJ Open

## Vitamin D Status among Adolescents in Kuwait: A Cross-sectional Study.

|                               |                                                                                                                                                                                                                                                                                                                                                                                                                                                                                                                                                                   |
|-------------------------------|-------------------------------------------------------------------------------------------------------------------------------------------------------------------------------------------------------------------------------------------------------------------------------------------------------------------------------------------------------------------------------------------------------------------------------------------------------------------------------------------------------------------------------------------------------------------|
| Journal:                      | <i>BMJ Open</i>                                                                                                                                                                                                                                                                                                                                                                                                                                                                                                                                                   |
| Manuscript ID                 | bmjopen-2017-021401                                                                                                                                                                                                                                                                                                                                                                                                                                                                                                                                               |
| Article Type:                 | Research                                                                                                                                                                                                                                                                                                                                                                                                                                                                                                                                                          |
| Date Submitted by the Author: | 28-Dec-2017                                                                                                                                                                                                                                                                                                                                                                                                                                                                                                                                                       |
| Complete List of Authors:     | Al-Taiar, Abdullah; Faculty of Medicine, Kuwait University, Department of Community Medicine and Behavioural Sciences<br>Rahman , Abdur ; College of Life Sciences, Kuwait University, Department of Food Science and Nutrition<br>Al-Sabah, Reem; Faculty of Medicine, Kuwait University, Department of Community Medicine and Behavioural Sciences<br>Shaban, Lemia ; College of Life Sciences, Kuwait University, Department of Food Science and Nutrition<br>Al-Harbi, Anwar ; Kuwait Institute for Scientific Research , Department of Science and Nutrition |
| Keywords:                     | PUBLIC HEALTH, Vitamin D, Adolescents, school children, Kuwait                                                                                                                                                                                                                                                                                                                                                                                                                                                                                                    |
|                               |                                                                                                                                                                                                                                                                                                                                                                                                                                                                                                                                                                   |

SCHOLARONE™  
Manuscripts

## Vitamin D Status among Adolescents in Kuwait: A Cross-sectional Study.

Abdullah Al-Taiar<sup>1</sup>, Abdur Rahman<sup>2</sup>, Reem Al-Sabah<sup>1</sup>, Lemia Shaban<sup>2</sup>, Anwar Al-Harbi<sup>3</sup>

<sup>1</sup> Department of Community Medicine and Behavioural Sciences

Faculty of Medicine, Kuwait University

Box: 24923 Safat-13110 Kuwait.

<sup>2</sup> Department of Food Science and Nutrition

College of Life Sciences, Kuwait University.

Box 5969, Safat-13060, Kuwait

<sup>3</sup> Kuwait Institute for Scientific Research

Department of Science and Nutrition

Kuwait

Box: 24885 Safat-13109, Kuwait

### **Before publication corresponding author:**

Dr Abdullah Al-Taiar

Associate Professor of Epidemiology

Dept. Community Medicine and Behavioural Sciences

Faculty of Medicine, Kuwait University

Box: 24923 Safat-13110 Kuwait.

Tel: +965-24986553

Fax: +965-5338948

E-mail: [altaiar@hsc.edu.kw](mailto:altaiar@hsc.edu.kw)

1  
2  
3 **After publication corresponding author:**  
4

5 Abdur Rahman  
6

7 Associate Professor  
8

9 Department of Food Science and Nutrition  
10

11 College of Life Sciences, Kuwait University  
12

13 Box: 5969 Safat-13060 Kuwait.  
14

15 Tel: +965-249633055  
16

17 Fax: +965-22513929  
18

19 E-mail: [abdurrahman.ahmad@ku.edu.kw](mailto:abdurrahman.ahmad@ku.edu.kw)  
20  
21  
22

23 Word count: 3389  
24  
25  
26  
27  
28  
29  
30  
31  
32  
33  
34  
35  
36  
37  
38  
39  
40  
41  
42  
43  
44  
45  
46  
47  
48  
49  
50  
51  
52  
53  
54  
55  
56  
57  
58  
59  
60

## Abstract

### Objectives

In Kuwait as in many Arab states in the gulf region, there are limited data on the prevalence of vitamin D deficiency among healthy adolescents. This study aimed to estimate the prevalence of vitamin D deficiency in a nationally representative sample of adolescents and investigate factors associated with vitamin D status.

### Methods

Cross-sectional study was conducted on 1416 adolescents who were randomly selected from middle schools in all governorates of Kuwait. Data were collected from parents and adolescents; while vitamin D was measured using liquid chromatography-tandem mass spectrometry (LC-MS/MS). Logistic regression was used to investigate the independent factors associated with vitamin D status.

### Results

The Prevalence of vitamin D deficiency was 1,150 (81.21%, 95%CI: 71.61-90.81) while severe deficiency was 559 (39.48%). Only 51 (3.60%) were vitamin D sufficient. Prevalence was significantly higher among females compared to males (91.69% vs. 70.32%;  $p < 0.001$ ). There was a significant inverse correlation between vitamin D and PTH (Spearman correlation = -0.35;  $p < 0.001$ ). In the final model, gender, age, governorate, parental education, body mass index, vitamin D supplement and number of times walking to school per week were all significantly related to vitamin D deficiency.

### Conclusion

High prevalence of vitamin D deficiency was noted among adolescents in Kuwait despite the abundant sunshine which may reflect strong sun avoidance behavior. Adequate outdoor daytime activities should be encouraged especially for females. We call for locally tailored guidelines for supplement in which females should have a higher amount of vitamin D supplement compared to males.

**Keywords:** Vitamin D, adolescents, Kuwait, Middle East, school children

### Strengths and limitations of this study

- This is the first study that aimed to estimate the prevalence of vitamin D on a large nationally representative sample of adolescents in Kuwait.
- We reported high prevalence of vitamin D particularly among females despite the abundant sunshine, and thus, skepticism about this issue should be cleared.
- We measured vitamin D using the recommended laboratory method and gathered data from both parents and adolescents.
- We did not measure the skin color, which can be an important determinant for vitamin D formulation in skin.

## Introduction

An optimal vitamin D status is extremely important during adolescence for proper growth and bone mineral accrual [1]. In addition to its critical role in bone health, several studies have linked vitamin D deficiency with various disease conditions during adolescence or adulthood such as asthma and allergies [2], type 2 diabetes [3], depression[4], cancer and even all-cause mortality [5]. However, the impact of vitamin D supplement on the risk of these diseases has not yet been tested in randomized control trials and thus remain under intense debate.

Several studies have evaluated the prevalence of vitamin D deficiency and insufficiency during adolescence reporting high prevalence of vitamin D deficiency worldwide [6, 7]. This was the case even in countries with abundant sunshine, which is the main factor for endogenous vitamin D synthesis. For example, in India the prevalence of vitamin D deficiency among adolescents was reported to be 85-98% [8, 9] while in Saudi Arabia it was found to be around 96% [10].

In Arab states in the Gulf region or the broader Middle East, there is paucity of data on vitamin D status in pediatric and adolescents population. The few studies that showed a high prevalence of vitamin D deficiency suffered from major methodological weaknesses. It is also known that factors which influence vitamin D status such as avoiding sun exposure, skin pigmentation, high body mass index (BMI) and dietary factors, particularly the lack of vitamin D supplementation and intake of vitamin D rich food [11] are all on rise in Arab states in the Gulf region. The aim of the present study was therefore to assess vitamin D status among adolescents living in Kuwait, a country with a plenty of sun shine.

## Methods

Kuwait is a small country at latitude (29.3759° N) with a population of 4.2 million. Approximately 25% of population is under the age of 19-year. The study population was students in the age between 11 and 16 years in the middle public schools. School based cross-sectional study was conducted on students from 12 middle public schools that were selected using stratified multistage cluster random sampling with probability proportional to size from all governorates of Kuwait. The sample allocation in each governorate was based on the relative size of that governorate as judged by the total number of students in the governorate. The study was funded by Kuwait University approved by The Ethics Committee at Ministry of Health in Kuwait as well as The Ethics Committee at Health Sciences Centre, Kuwait University.

An informed consent was sent to the parents along with a self-administered questionnaire on parents' level of education and income, type of housing, number of siblings of the index child, passive smoking at household and the number of times per week the index child had a meal prepared outside home during the last three months. After obtaining written informed consent from the parents and verbal consent from the school children, trained dedicated personnel carried out face-to-face interview with the students using structured questionnaire. The questionnaire was carefully developed after extensive review of the literature and was pilot tested on 20 students who were not included in the study. It comprised questions on habitual sun exposure during the last three months, which was assessed by the core questions developed to measure the exposure to sunlight in adolescents as described by Glanz et al. [12]; in addition to smoking habits, physical activity and dietary intake. Data on physical activity were collected using a questionnaire that was developed based on Youth Physical Activity Questionnaire in UK [13] and The Arab teens lifestyle study [14]. The questionnaire was validated among high school students and showed strong correlation with data collected by accelerometers (Spearman correlation 0.92;  $p < 0.001$  for total steps count) (not published).



1  
2  
3 Data on dietary intake of vitamin D were collected using food frequency questionnaire for calcium and  
4 vitamin D intake in adolescents [15], which have been validated in our settings [16]. Food models or serving  
5 containers were used to assist in estimating serving size. Measurements of standing height and body weight  
6 of the study subjects were assessed using digital weight and height scale in a standardized manner.  
7  
8  
9

10  
11  
12  
13 Five ml of venous blood was collected in gel-containing tubes (SST II advance, BD vacutainer) from each  
14 child by a trained nurse; and the samples were protected from light. On the same day, the samples were  
15 centrifuged at 2000 x g for 15 minutes and the serum was transferred to Eppendorf tubes and stored at -  
16 80°C until analysis. Serum 25-hydroxyvitamin D (25-OH-D) concentration is the best marker of vitamin D  
17 status as it is the major circulating form of vitamin D, reflecting both the amount produced in the skin after  
18 sun exposure and the amount consumed in foods [17]. It was measured in College of American Pathologists  
19 CAP-accredited laboratory by liquid chromatography-tandem mass spectrometry (LC-MS/MS), which is the  
20 recommended method of vitamin D assessment in epidemiological studies [18]. According to the Endocrine  
21 Society [19] and the Society for Adolescent Health and Medicine [20], we used the following cut-off of 25-  
22 OH-D to define vitamin D status: vitamin D deficiency < 50 nmol/L (20 ng/mL); vitamin D insufficiency 50-75  
23 nmol/L (20-30 ng/mL); vitamin D sufficiency  $\geq$  75 nmol/L (30 ng/mL). Thus, hypovitaminosis D was defined in  
24 the presence of 25-OH-D levels < 75.0 nmol/L (30 ng/mL). Furthermore, severe vitamin D deficiency was  
25 defined as 25-OH-D levels < 25.0 nmol/L (10 ng/mL) [21]. PTH level  $\geq$  65.0 ng/L was suggestive of  
26 hyperparathyroidism.  
27  
28  
29  
30  
31  
32  
33  
34  
35  
36  
37  
38  
39  
40  
41  
42  
43  
44  
45

46 Data were double entered into specifically designed database using Epidata Entry. Data analysis was  
47 conducted using Stata (StataCorp. 2011. Release 12). BMI was calculated as weight (Kg) divided by height  
48 squared (m<sup>2</sup>). Weight status was categorized into normal, overweight and obese according to WHO growth  
49 charts. Chi-squared test was used to test differences in categorical variables. A modified version of multiple  
50 logistic regression that calculates prevalence ratio was used to study the association between each  
51  
52  
53  
54  
55

1  
2  
3 presumed risk factor and vitamin D deficiency (25-OH-D < 50 nmol/L). This is because vitamin D deficiency  
4 was a common outcome and using log-binomial regression was not possible because the model failed to  
5 converge. Variables that were found to be statistically significant at 15% level of significance were  
6 considered in multivariate analysis. Variables were divided into groups (e.g. socio-demographic, sun  
7 exposure, etc) and were added sequentially to the model. Statistical significance of variables was evaluated  
8 by likelihood ratio test which compares the model with and without the variable. Goodness of fit of the final  
9 model was evaluated by Hosmer-Lemeshow test. Factors with  $p < 0.05$  were deemed to be statistically  
10 significant. The analysis above was repeated using hypovitaminosis (25-OH-D levels < 75.0 nmol/L) as the  
11 binary outcome. We also conducted multiple linear regression analysis using vitamin D level as a  
12 continuous outcome (after log-transformation) and reported the results in the text. Because of the complex  
13 structure of this survey data, we used survey method, which gives more precise estimates of standard error.  
14  
15  
16  
17  
18  
19  
20  
21  
22  
23  
24  
25  
26  
27

## 28 **Results**

29  
30 Of 1583 parents approached, 161 refused to participate (children, parents or both). Another 6 samples were  
31 not sufficient to conduct blood analysis, thus the analysis below comprised 1416 students. Table (1) shows  
32 the socio-demographic characteristics of the study group. The mean (SD) age was 12.48 (0.94) years and  
33 694 (49.01%) were females.  
34  
35  
36  
37  
38  
39  
40  
41  
42  
43  
44  
45  
46  
47  
48  
49  
50  
51  
52  
53  
54  
55  
56  
57  
58  
59  
60

Table (1). Socio-demographic characteristics of 1416 adolescents in public middle schools in Kuwait.

| <b>Characteristics</b>                              |               |      |
|-----------------------------------------------------|---------------|------|
| <b>Age in years, Mean (SD) years</b>                | 12.48         | 0.94 |
|                                                     | <b>n (%)</b>  |      |
| <b>Gender</b>                                       |               |      |
| Male                                                | 694 (49.01)   |      |
| <b>Nationality</b>                                  |               |      |
| Kuwaiti                                             | 1,081 (76.34) |      |
| Non-Kuwait                                          | 335 (23.66)   |      |
| <b>Father's Education<sup>1</sup></b>               |               |      |
| No formal education                                 | 15 ( 1.08)    |      |
| Primary/Intermediate                                | 221 (15.98)   |      |
| Secondary (high school)                             | 344 (24.87)   |      |
| Diploma                                             | 261 (18.87)   |      |
| University & above                                  | 542 (39.19)   |      |
| <b>Mother's Education<sup>2</sup></b>               |               |      |
| No formal education                                 | 31 ( 2.22)    |      |
| Primary/Intermediate                                | 152 (10.89)   |      |
| Secondary (high school)                             | 304 (21.78)   |      |
| Diploma                                             | 304 (21.78)   |      |
| University & above                                  | 605 (43.34)   |      |
| <b>Father's Income<sup>3</sup> (Kuwaiti Dinars)</b> |               |      |
| Less than 500                                       | 91 ( 6.64)    |      |
| 500 to 1000                                         | 304 (22.19)   |      |
| 1001 to 1500                                        | 421 (30.73)   |      |
| 1501 to 2000                                        | 219 (15.99)   |      |
| More than 2000                                      | 173 (12.63)   |      |
| Do not wish to tell                                 | 162 (11.82)   |      |
| <b>Mother's Employment Status<sup>4</sup></b>       |               |      |
| Housewife                                           | 488 (35.16)   |      |
| Paid employment                                     | 680 (48.99)   |      |
| Others                                              | 220 (15.85)   |      |
| <b>Housing<sup>5</sup></b>                          |               |      |
| Rented flat                                         | 510 (36.51)   |      |
| Rented house                                        | 163 (11.67)   |      |
| Owned flat                                          | 59 ( 4.22)    |      |
| Owned house                                         | 665 (47.60)   |      |

<sup>1</sup>Missing for 33 participants; <sup>2</sup>Missing for 20 participants; <sup>3</sup>Missing for 46 participants; <sup>4</sup>Missing for 28 participants;

<sup>5</sup>Missing for 19 participants

1  
2  
3  
4  
5 The median serum (Interquartile Range, IQR) 25-OH-D was 29.7 (19.2- 44.2) nmol/L. Prevalence of vitamin  
6 D deficiency was 1,150 (81.21%, 95%CI: 71.61-90.81) while severe deficiency was 559 (39.48%). Only 51  
7 (3.60%) were vitamin D sufficient. Prevalence was significantly higher among females compared to males  
8 (91.69% vs. 70.32%;  $p < 0.001$ ). Also, the median (IQR) of vitamin D was 39.8 (29.4- 52.7) nmol/L and 21.5  
9 (14.7- 30.7) among males and females, respectively ( $p < 0.001$ ). There was no difference in the prevalence of  
10 vitamin D deficiency between Kuwaitis and non-Kuwaitis after stratification by gender. There was significant  
11 inverse correlation between vitamin D and PTH (Spearman correlation = -0.35;  $p < 0.001$ ). In relation to  
12 vitamin D status, elevated PTH (secondary hyperparathyroidism  $PTH \geq 65$  ng/L. i.e. 6.89 pmol/L) was  
13 detected in 312 (55.81%), 185 (31.30%) and 59 (27.57%) of adolescents with vitamin D severe deficiency,  
14 deficiency and insufficiency, respectively. Serum median (IQR) PTH was significantly different dependent  
15 on vitamin D status (severe deficiency 7.37 [5.44-10.55] pmol/L; deficiency 5.63[4.13-7.40] pmol/L;  
16 insufficiency 5.14[3.87-6.99] pmol/L; sufficiency 4.31[3.75- 5.73] pmol/L;  $p < 0.001$ ). The actual relationship  
17 between 25-OH-D and PTH levels is shown in figure (1).  
18  
19  
20  
21  
22  
23  
24  
25  
26  
27  
28  
29  
30  
31  
32  
33  
34

35 Factors that showed significant association with vitamin D deficiency (25-OH-D < 50 nmol/L) in univariate  
36 analysis were Gender, parental education, number of times per week the participants consumed breakfast  
37 and dinner prepared outside home, taking supplements, walking to school (instead of using school bus or  
38 car) in addition to BMI were all significant predictors in univariate analysis (Supplementary Table). Similarly,  
39 time spent outdoor per day (between 10:00 am and 4:00 pm) during weekdays and weekends in addition to  
40 wearing sunscreen and staying in shade or under an umbrella were all significant predictors in univariate  
41 analysis.  
42  
43  
44  
45  
46  
47  
48  
49  
50  
51  
52  
53  
54  
55  
56  
57  
58  
59  
60

Table (2): Factors associated with vitamin D deficiency in multivariate analysis, 1416 middle school students.

| Characteristics                                               | Prevalence<br>n (%) | Prevalence Ratio<br>[95%CI] | p      |
|---------------------------------------------------------------|---------------------|-----------------------------|--------|
| <b>Gender</b>                                                 |                     |                             |        |
| Male                                                          | 488 (70.32)         | 1 [Ref.]                    | <0.001 |
| Female                                                        | 662 (91.69)         | 1.20 [1.17- 1.21]           |        |
| <b>Age (year)</b>                                             |                     |                             |        |
| <12                                                           | 409 (77.61)         | 1 [Ref.]                    | 0.003  |
| 12-                                                           | 369 (84.05)         | 1.10 [1.04- 1.14]           |        |
| ≥13                                                           | 372 (82.67)         | 1.07 [1.01- 1.12]           |        |
| <b>Governorate<sup>1</sup></b>                                |                     |                             |        |
| Capital                                                       | 127 (81.41)         | 1 [Ref.]                    | <0.001 |
| Hawally                                                       | 188 (76.42)         | 0.88 [0.73-1.01]            |        |
| Farawanya                                                     | 183 (77.54)         | 0.85 [0.68-0.99]            |        |
| Jahra                                                         | 214 (89.54)         | 1.10 [0.98-1.17]            |        |
| Mubarak al-Kabeer                                             | 124 (83.78)         | 1.06 [0.93-1.14]            |        |
| Ahmadi                                                        | 296 (79.78)         | 1.06 [0.95-1.13]            |        |
| <b>Father's Education<sup>2</sup></b>                         |                     |                             |        |
| Primary/Intermediate/no formal education                      | 205 (86.86)         | 1 [Ref.]                    | <0.009 |
| Secondary (high school)                                       | 297 (86.34)         | 1.04 [0.92-1.12]            |        |
| Diploma                                                       | 220 (84.29)         | 1.01 [0.88-1.10]            |        |
| University & above                                            | 399 (73.62)         | 0.89 [0.76-1.01]            |        |
| <b>Passive smoking in household<sup>3</sup></b>               |                     |                             |        |
| No                                                            | 704 (78.14)         | 1 [Ref.]                    | <0.006 |
| Yes                                                           | 426 (87.12)         | 1.08 [1.02-1.13]            |        |
| <b>Currently taking supplements<sup>4</sup></b>               |                     |                             |        |
| No                                                            | 1,045 (83.20)       | 1 [Ref.]                    | <0.001 |
| Yes                                                           | 103 (65.19)         | 0.63 [0.49-0.76]            |        |
| <b>Consumption of sugary drinks per week</b>                  |                     |                             |        |
| None                                                          | 123 (71.93)         | 1 [Ref.]                    | 0.002  |
| Once-Three times                                              | 633 (81.99)         | 1.11 [1.05-1.16]            |        |
| Four-Six times                                                | 135 (78.95)         | 1.07 [0.96-1.14]            |        |
| Seven/more times                                              | 256 (85.62)         | 1.15 [1.08-1.19]            |        |
| <b>Number of times walking to school per week<sup>5</sup></b> |                     |                             |        |
| None                                                          | 982 (84.80)         | 1 [Ref.]                    | <0.001 |
| 1-8 times                                                     | 99 (63.87)          | 0.81 [0.68-0.93]            |        |
| Every day                                                     | 69 (66.99)          | 0.77 [0.61-0.92]            |        |

**Body Mass Index Categories<sup>6</sup>**

|                      |             |                  |       |
|----------------------|-------------|------------------|-------|
| <b>Normal weight</b> | 465 (77.37) | 1 [Ref.]         | 0.001 |
| <b>Overweight</b>    | 270 (84.38) | 1.08 [1.01-1.13] |       |
| <b>Obese</b>         | 400 (84.93) | 1.12 [1.07-1.16] |       |
| <b>Underweight</b>   | 15 (62.50)  | 0.93 [0.67-1.10] |       |

<sup>1</sup>Missing for 20 participants; <sup>2</sup> Missing for 33 participants; <sup>3</sup> Missing for 26 participants; <sup>4</sup> Missing for 2 participants; <sup>5</sup> Missing for 26 participants; <sup>6</sup> according to WHO growth charts.

Table (2) shows the independent predictors for vitamin D deficiency in multivariate analysis. In the final model, gender, age, governorate, parental education, vitamin D supplement, number of times walking to school per week were all significantly related to vitamin D deficiency. Dietary intake data were available only for a few hindered, and of all food items, only eggs were significantly related to vitamin D deficiency in multivariate model. We repeated the analysis above using hypovitaminosis (sufficient Vs. insufficient/deficient) as a binary outcome. The same factors were found to be significantly related to hypovitaminosis, although mother's education (instead of father's education) was found to be significant in this analysis. We also used linear regression to identify the factors associated with vitamin D level as a continuous variable. Factors that showed significant association with vitamin D level in multivariate analysis were age, gender, governorate, passive smoking at household, number of times of having breakfast meal outside home in the last three months, time spent outdoor during weekdays, preference to stay in shade or under the umbrella, and BMI categories. With respect to dietary factors, milk and cheese, fast food hamburger and tuna fish were significantly associated with vitamin D level in univariate linear regression. When these food items were introduced to the final model, only milk and tuna fish were significantly associated with vitamin D level. It is worth noting that in this analysis the best model was able to explain only 45% of the variability in the vitamin D level.

## Discussion

Although several reports have described Vitamin D deficiency among adults in the Arab states in the Gulf region, there are limited data on the prevalence of vitamin D deficiency among healthy adolescents.

Our study used a nationally representative sample to examine a large number of healthy adolescents, becoming to our knowledge the only study focusing on this group in Kuwait. We used the recommended method to measure vitamin D level and demonstrated that vitamin D deficiency is too common despite the abundant sunshine and that the secondary hyperparathyroidism due to vitamin D deficiency is also common.

In our setting, approximately, 81% and 15% of adolescents are vitamin D deficient or insufficient, respectively. This is higher than that reported among adolescents in European countries [22-24], southeastern United States [25, 26] or New Zealand [27]. Our result is more akin to that reported from Saudi Arabia (95.6%) [10], India (85-98%) [8, 9], or Korea where only 2.3% of adolescents were found to be vitamin D sufficient [28]. Our findings are also in accordance with the high prevalence reported consistently among adult population in Kuwait [29] or other countries in the Gulf region such as Saudi Arabia [30], Bahrain [31] and Qatar [32].

There has been a lot of skepticism of vitamin D deficiency in the Arab states in the Gulf region due the abundant sunshine. Informal discussions, even among scientific community, in the region show strong denial attributing the problem to wrong measurements or any other reasons. Nevertheless, the studies consistently reported high prevalence of vitamin D deficiency including those studies which used different measurement methods and also in different age groups. Factors that may hinder cutaneous synthesis of vitamin D despite sunshine may include dust storms (occur almost in one third of the days in Kuwait [33]), indoor lifestyle, head covering and other cultural practices in addition to the use of sunscreen. Given the fact that at our latitude, sun exposure is effective in synthesizing vitamin D throughout the entire year, the high

1  
2  
3 prevalence of vitamin D deficiency may reflect strong sun avoidance behavior. Only around 6% of the  
4 adolescents spent more than two hours outdoor per day between 10:00 am and 4:00 pm during weekdays  
5 (data not shown). This can be further supported by the counterintuitive seasonal variation that has been  
6 reported in the region, in which the prevalence of vitamin D deficiency is higher in summer compared to  
7 winter [34]. Owing to desert climate, avoiding sun exposure would be stronger during summer due to  
8 extremely high temperature. We collected blood samples in February, March and April and thus we are  
9 unable to describe seasonal variation in vitamin D status. Other factors such as using sunscreen and dust  
10 storms cannot also be excluded. Exposure to sunlight contributes up to 90–95% of vitamin D supply, while  
11 the number of foods naturally containing a significant quantity of vitamin D is very limited except for some  
12 oily fishes that rarely consumed by adolescents worldwide and in our setting [35] (~5% of adolescents in our  
13 setting consumed salmon once per week or more). As such, education of the parents on the safe amount of  
14 sun exposure in addition to changes in the school environment may produce the highest impact on vitamin  
15 D status among adolescents.  
16  
17  
18  
19  
20  
21  
22  
23  
24  
25  
26  
27  
28  
29  
30  
31  
32  
33

34 Like several studies that investigated vitamin D deficiency among adolescents, females had significantly  
35 higher prevalence of vitamin D deficiency compared to males even after adjusting for all potential  
36 confounders. Also, vitamin D level was significantly lower among females compared to males. This is similar  
37 to that reported among adolescents from Saudi Arabia [36], India [9], Korea [28] and Taiwan [37]. This  
38 pattern is not common in other settings as reported from a clinic-based cross-sectional study in US [25] or  
39 Italy [23]. In The Arab states in the Gulf region and India, cultural practices, such as type of clothing that  
40 cover whole body and indoor lifestyle, have been proposed to exacerbate vitamin D deficiency among  
41 females. Indeed, we found males consistently reporting higher amount of outdoor exposure to sunlight  
42 compared to females in addition to that females reported consistently higher sun avoidance behavior such  
43 as using sunscreen and staying in shade or under an umbrella. Adjusting for the exposure to sunlight did not  
44 explain the whole association between vitamin D status and gender which could be due residual  
45  
46  
47  
48  
49  
50  
51  
52  
53  
54  
55



1  
2  
3 confounding. We enquired about the type of clothing among females using photo cards but vitamin D  
4  
5 deficiency was too common among females, which did not allow for us to investigate the impact of type of  
6  
7 dress on vitamin D status among females. In our setting, efforts to improve vitamin D level among  
8  
9 adolescents should focus on females and the current recommended doses for vitamin D supplement should  
10  
11 also take this into account and recommend higher doses for females compared to males.  
12  
13

14  
15  
16 Most of the students in Kuwait do not walk to schools and are mainly transported using private cars or  
17  
18 school buses. The number of times the student walk to/from school as well as the time spent on walking  
19  
20 to/from school was significantly associated with vitamin D deficiency. Those who walk to/from schools were  
21  
22 less likely to have vitamin D deficiency compared to those who used school bus or private cars. Walking to  
23  
24 schools can be a good opportunity for sunlight exposure but also as a physical activity itself may improve  
25  
26 vitamin D level. In a study in USA, physical activity was inversely associated with hypovitaminosis D but not  
27  
28 related to vitamin D level [25] while in another study, vigorous physical activity was significantly associated  
29  
30 with vitamin D level [26]. It has been proposed that physical activity may increase the level of vitamin D  
31  
32 through increasing the time spent outdoor in sunlight or through reducing the risk of obesity [11]. However,  
33  
34 in our study the total time spent on other physical/sport activities was significantly associated with vitamin D  
35  
36 deficiency in univariate but not in multivariate analysis. Unlike walking to the schools, most sport activities in  
37  
38 our setting are practiced in closed areas or during night time due to severe hot weather which may explain  
39  
40 the lack of association between total time spent on physical activities and vitamin D deficiency in  
41  
42 multivariate analysis. Like many other studies [22, 25, 28], BMI was inversely associated with vitamin D  
43  
44 deficiency.  
45  
46  
47  
48  
49

50 In our study, sugary drinks were positively associated with the prevalence of vitamin D deficiency. This is  
51  
52 similar to that reported from Saudi Arabia [34] and USA [25]. Consumption of sugary drinks among  
53  
54 adolescents usually occur at the expense of milk consumption which contains vitamin D [38]. We have  
55  
56  
57  
58  
59  
60

1  
2  
3 noted this pattern in our data as those consuming sugary drinks were less likely to consume milk (data not  
4 shown). Although milk consumption was not related to vitamin D deficiency it was significantly related to the  
5 vitamin D level in linear regression analysis. It has been proposed that presence of vitamin D-fortified juices  
6 may help to alleviate the problem of vitamin D deficiency [25].  
7  
8  
9  
10

11  
12  
13 We found an association between passive smoking at household (reported by parents) and vitamin D  
14 deficiency among adolescents, which is interesting and have been reported before [37]. Only less than 1%  
15 of the adolescents in our setting reported active smoking. Smoking also has been reported to be a  
16 significant determinant for low vitamin D level among adults in some studies [24] but not in others [39] and  
17 this issue remains controversial [24]. Furthermore, a recent study found no significant association between  
18 cotinine level and vitamin D deficiency among Korean adolescents [28]. One of the hypothesized  
19 mechanism is that smoking may reflect a less healthy life style including less physical activity and bad  
20 dietary habits [24] but also a causal link has been proposed as metabolites in cigarette's smoke can inhibit  
21 CYP27A1 activity [40].  
22  
23  
24  
25  
26  
27  
28  
29  
30  
31  
32

### 33 34 Strengths and limitation

35  
36 This is the first study that measured vitamin D on a large nationally representative sample of adolescents in  
37 Kuwait. We used a measurement method that is recommended for epidemiological studies and gathered  
38 data from both parents and adolescents. However, we did not measure the skin color, which can be an  
39 important determinant for vitamin D formulation in skin during exposure to sunlight. Furthermore, there were  
40 adolescents with low vitamin D concentration which was not accompanied by secondary  
41 hyperparathyroidism (Figure 1). This has been noted in other studies [25, 34], the clinical significance of  
42 which is unknown in young children and deserves further study. We evaluated the dietary intake of vitamin  
43 D in only a subgroup of study participants. However, dietary intake of vitamin D is known to have a smaller  
44  
45  
46  
47  
48  
49  
50  
51  
52  
53  
54  
55  
56  
57  
58  
59  
60

1  
2  
3 contribution to vitamin D status compared to cutaneous synthesis in response to sun exposure [35] and data  
4  
5 on vitamin D supplement were obtained from all participants.  
6

## 7 8 **Conclusion**

9  
10 In conclusion, a high prevalence of vitamin D deficiency was noted among adolescents in Kuwait despite the  
11  
12 abundant sunshine. This may reflect strong sun avoidance behavior as only less than 4% of adolescents  
13  
14 were vitamin D sufficient and most of them were on vitamin D supplements. An optimal vitamin D level is  
15  
16 essential during adolescents; and vitamin D deficiency at this age represents a public health problem that  
17  
18 should be addressed. First, skepticism about the problem or its clinical significance may hinder efforts to put  
19  
20 forward practical solutions. This cynicism particularly among scientific community and decision makers  
21  
22 should be cleared. Second, sun exposure is the main source for vitamin D level in this age group, therefore  
23  
24 adequate outdoor daytime activities should be encouraged especially for females. Slight modifications in  
25  
26 school environment to facilitate exposure to sunlight during school breaks between classes can be fruitful.  
27  
28 With respect to vitamin D supplementation, we call for locally tailored guidelines in which females should  
29  
30 have a higher amount of vitamin D supplement compared to males. Vitamin D fortification particularly for  
31  
32 food products that are popular for adolescents in our setting should be also considered. Increasing sunlight  
33  
34 exposure and vitamin D fortification should not be considered mutually exclusive and that both strategies  
35  
36 can be adopted.  
37  
38  
39

## 40 41 **Acknowledgements**

42 The authors acknowledge the assistance of Nadien Sameeh Rushdi and the team of data collectors.  
43  
44 Cooperation of all participating schools, and the facilitation of the project by the Ministry of Education is  
45  
46 greatly acknowledged. We also acknowledge the support and cooperation of the staff and management of  
47  
48 the United Genetics Laboratories, Kuwait in vitamin D analysis.  
49  
50  
51  
52  
53  
54  
55

### Authors' contributions

AT contributed to the study design and data collection, analyzed the data and drafted the paper. He had full access to all the data and took responsibility for the integrity of the data. AR contributed to the design of the study and data collection in addition to the writing and revising the manuscript. RS and LS contributed to the design of the study and data collection in addition to revising the manuscript with significant intellectual input. AH contributed to the data collection and revised the manuscript.

**Funding:** The study was supported and funded by Kuwait University, Research Sector (Project No. WF 02/13).

**Competing interests:** The authors declare that they have no competing interests

**Data sharing statement:** No additional data are available.

## REFERENCES

- 1 Mouratidou T, Vicente-Rodriguez G, Gracia-Marco L, *et al.* Associations of dietary calcium, vitamin D, milk intakes, and 25-hydroxyvitamin D with bone mass in Spanish adolescents: the HELENA study. *Journal of clinical densitometry : the official journal of the International Society for Clinical Densitometry* 2013;**16**:110-7.
- 2 Sharief S, Jariwala S, Kumar J, *et al.* Vitamin D levels and food and environmental allergies in the United States: results from the National Health and Nutrition Examination Survey 2005-2006. *The Journal of allergy and clinical immunology* 2011;**127**:1195-202.
- 3 Lucato P, Solmi M, Maggi S, *et al.* Low vitamin D levels increase the risk of type 2 diabetes in older adults: A systematic review and meta-analysis. *Maturitas* 2017;**100**:8-15.
- 4 Bahrami A, Mazloum SR, Maghsoudi S, *et al.* High Dose Vitamin D Supplementation Is Associated With a Reduction in Depression Score Among Adolescent Girls: A Nine-Week Follow-Up Study. *Journal of dietary supplements* 2017:1-10.
- 5 Chowdhury R, Kunutsor S, Vitezova A, *et al.* Vitamin D and risk of cause specific death: systematic review and meta-analysis of observational cohort and randomised intervention studies. *BMJ (Clinical research ed)* 2014;**348**:g1903.
- 6 Hilger J, Friedel A, Herr R, *et al.* A systematic review of vitamin D status in populations worldwide. *The British journal of nutrition* 2014;**111**:23-45.
- 7 Basatemur E, Horsfall L, Marston L, *et al.* Trends in the Diagnosis of Vitamin D Deficiency. *Pediatrics* 2017;**139**.
- 8 Garg MK, Marwaha RK, Khadgawat R, *et al.* Efficacy of vitamin D loading doses on serum 25-hydroxy vitamin D levels in school going adolescents: an open label non-randomized prospective trial. *Journal of pediatric endocrinology & metabolism : JPEM* 2013;**26**:515-23.
- 9 Kapil U, Pandey RM, Goswami R, *et al.* Prevalence of Vitamin D deficiency and associated risk factors among children residing at high altitude in Shimla district, Himachal Pradesh, India. *Indian journal of endocrinology and metabolism* 2017;**21**:178-83.
- 10 AlBuhairan FS, Tamim H, Al Dubayee M, *et al.* Time for an Adolescent Health Surveillance System in Saudi Arabia: Findings From "Jeeluna". *The Journal of adolescent health : official publication of the Society for Adolescent Medicine* 2015;**57**:263-9.
- 11 Valtuena J, Gonzalez-Gross M, Huybrechts I, *et al.* Factors associated with vitamin D deficiency in European adolescents: the HELENA study. *Journal of nutritional science and vitaminology* 2013;**59**:161-71.
- 12 Glanz K, Yaroch AL, Dancel M, *et al.* Measures of sun exposure and sun protection practices for behavioral and epidemiologic research. *Archives of dermatology* 2008;**144**:217-22.
- 13 UEA. Youth Physical Activity Questionnaire. University of East Anglia 2011.
- 14 Al-Hazzaa HM, Al-Sobayel HI, Musaiger AO. Convergent validity of the Arab Teens Lifestyle Study (ATLS) physical activity questionnaire. *International journal of environmental research and public health* 2011;**8**:3810-20.
- 15 Taylor C, Lamparello B, Kruczek K, *et al.* Validation of a food frequency questionnaire for determining calcium and vitamin D intake by adolescent girls with anorexia nervosa. *Journal of the American Dietetic Association* 2009;**109**:479-85, 85 e1-3.

- 1  
2  
3 16 Papandreou D, achaniotis N, Lari M, *et al.* Validation of a Food Frequency Questionnaire for Vitamin D and  
4 Calcium Intake in Healthy Female College Students. *Food and Nutrition Sciences* 2014;**5**:2048-52.  
5  
6 17 Holick MF. Vitamin D deficiency. *The New England journal of medicine* 2007;**357**:266-81.  
7  
8 18 Vogeser M. Quantification of circulating 25-hydroxyvitamin D by liquid chromatography-tandem mass  
9 spectrometry. *The Journal of steroid biochemistry and molecular biology* 2010;**121**:565-73.  
10  
11 19 Holick MF, Binkley NC, Bischoff-Ferrari HA, *et al.* Evaluation, treatment, and prevention of vitamin D  
12 deficiency: an Endocrine Society clinical practice guideline. *The Journal of clinical endocrinology and metabolism*  
13 2011;**96**:1911-30.  
14  
15 20 Medicine SfAHa. Recommended vitamin D intake and management of low vitamin D status in adolescents: a  
16 position statement of the society for adolescent health and medicine. *The Journal of adolescent health : official*  
17 *publication of the Society for Adolescent Medicine* 2013;**52**:801-3.  
18  
19 21 Braegger C, Campoy C, Colomb V, *et al.* Vitamin D in the healthy European paediatric population. *Journal of*  
20 *pediatric gastroenterology and nutrition* 2013;**56**:692-701.  
21  
22 22 Gonzalez-Gross M, Valtuena J, Breidenassel C, *et al.* Vitamin D status among adolescents in Europe: the  
23 Healthy Lifestyle in Europe by Nutrition in Adolescence study. *The British journal of nutrition* 2012;**107**:755-64.  
24  
25 23 Vierucci F, Del Pistoia M, Fanos M, *et al.* Vitamin D status and predictors of hypovitaminosis D in Italian  
26 children and adolescents: a cross-sectional study. *European journal of pediatrics* 2013;**172**:1607-17.  
27  
28 24 Kassi EN, Stavropoulos S, Kokkoris P, *et al.* Smoking is a significant determinant of low serum vitamin D in  
29 young and middle-aged healthy males. *Hormones (Athens, Greece)* 2015;**14**:245-50.  
30  
31 25 Gordon CM, DePeter KC, Feldman HA, *et al.* Prevalence of vitamin D deficiency among healthy adolescents.  
32 *Archives of pediatrics & adolescent medicine* 2004;**158**:531-7.  
33  
34 26 Dong Y, Pollock N, Stallmann-Jorgensen IS, *et al.* Low 25-hydroxyvitamin D levels in adolescents: race,  
35 season, adiposity, physical activity, and fitness. *Pediatrics* 2010;**125**:1104-11.  
36  
37 27 Rockell JE, Green TJ, Skeaff CM, *et al.* Season and ethnicity are determinants of serum 25-hydroxyvitamin  
38 D concentrations in New Zealand children aged 5-14 y. *The Journal of nutrition* 2005;**135**:2602-8.  
39  
40 28 Byun EJ, Heo J, Cho SH, *et al.* Suboptimal vitamin D status in Korean adolescents: a nationwide study on its  
41 prevalence, risk factors including cotinine-verified smoking status and association with atopic dermatitis and asthma.  
42 *BMJ open* 2017;**7**:e016409.  
43  
44 29 Zhang FF, Al Hooti S, Al Zenki S, *et al.* Vitamin D deficiency is associated with high prevalence of diabetes in  
45 Kuwaiti adults: results from a national survey. *BMC public health* 2016;**16**:100.  
46  
47 30 Al-Daghri NM. Vitamin D in Saudi Arabia: Prevalence, distribution and disease associations. *The Journal of*  
48 *steroid biochemistry and molecular biology* 2016.  
49  
50 31 Golbahar J, Al-Saffar N, Altayab Diab D, *et al.* Predictors of vitamin D deficiency and insufficiency in adult  
51 Bahrainis: a cross-sectional study. *Public health nutrition* 2014;**17**:732-8.  
52  
53 32 Mahdy S, Al-Emadi SA, Khanjar IA, *et al.* Vitamin D status in health care professionals in Qatar. *Saudi*  
54 *medical journal* 2010;**31**:74-7.  
55  
56  
57  
58  
59  
60

- 1  
2  
3 33 Thalib L, Al-Taiar A. Dust storms and the risk of asthma admissions to hospitals in Kuwait. *The Science of the total environment* 2012;**433**:347-51.  
4  
5  
6 34 Sulimani RA, Mohammed AG, Alfadda AA, *et al.* Vitamin D deficiency and biochemical variations among urban Saudi adolescent girls according to season. *Saudi medical journal* 2016;**37**:1002-8.  
7  
8  
9 35 Holick MF. The D-lightful vitamin D for child health. *JPEN Journal of parenteral and enteral nutrition* 2012;**36**:9S-19S.  
10  
11  
12 36 Al-Daghri NM, Al-Saleh Y, Aljohani N, *et al.* Vitamin D Deficiency and Cardiometabolic Risks: A Juxtaposition of Arab Adolescents and Adults. *PloS one* 2015;**10**:e0131315.  
13  
14  
15 37 Yao TC, Tu YL, Chang SW, *et al.* Suboptimal vitamin D status in a population-based study of Asian children: prevalence and relation to allergic diseases and atopy. *PloS one* 2014;**9**:e99105.  
16  
17  
18 38 O'Connor TM, Yang SJ, Nicklas TA. Beverage intake among preschool children and its effect on weight status. *Pediatrics* 2006;**118**:e1010-8.  
19  
20  
21 39 Scragg R, Holdaway I, Jackson R, *et al.* Plasma 25-hydroxyvitamin D3 and its relation to physical activity and other heart disease risk factors in the general population. *Annals of epidemiology* 1992;**2**:697-703.  
22  
23  
24 40 Aboraia AS, Makowski B, Bahja A, *et al.* Synthesis and CYP24A1 inhibitory activity of (E)-2-(2-substituted benzylidene)- and 2-(2-substituted benzyl)-6-methoxy-tetralones. *European journal of medicinal chemistry* 2010;**45**:4427-34.  
25  
26  
27  
28  
29  
30  
31

## Figure legends

32  
33  
34  
35 **Figure (1):** Parathyroid hormone (PTH) with Serum 25-hydroxyvitamin D (25-OH-D) concentration.  
36 Individuals above the horizontal line (PTH  $\geq$  65.0 ng/L) are adolescents with secondary hyperthyroidism.  
37 Vertical lines represent the 25-OH-D cut-off used to define vitamin D deficiency, insufficiency and  
38 sufficiency.  
39  
40  
41  
42  
43  
44  
45  
46  
47  
48  
49  
50  
51  
52  
53  
54  
55

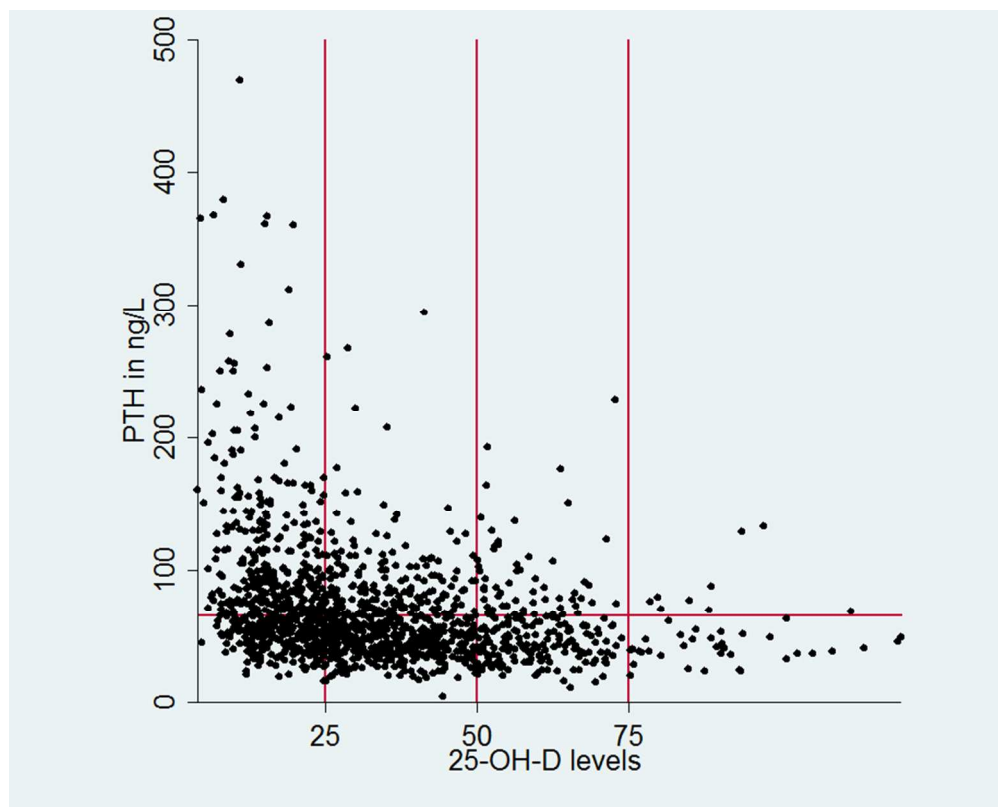

Figure (1): Parathyroid hormone (PTH) with Serum 25-hydroxyvitamin D (25-OH-D) concentration. Individuals above the horizontal line (PTH  $\geq$  65.0 ng/L) are adolescents with secondary hyperthyroidism. Vertical lines represent the 25-OH-D cut-off used to define vitamin D deficiency, insufficiency and sufficiency.

323x259mm (72 x 72 DPI)



Supplementary Table (1). Factors associated with vitamin D deficiency in univariate analysis, 1416 middle school students.

| Characteristics                                    | Prevalence<br>n (%) | Prevalence Ratio [95%CI] | p      |
|----------------------------------------------------|---------------------|--------------------------|--------|
| <b>Gender</b>                                      |                     |                          |        |
| Male                                               | 488 (70.32)         | 1 [Ref.]                 | <0.001 |
| Female                                             | 662 (91.69)         | 1.30 [1.26- 1.33]        |        |
| <b>Age (year)</b>                                  |                     |                          |        |
| <12                                                | 409 (77.61)         | 1 [Ref.]                 | 0.024  |
| 12-                                                | 369 (84.05)         | 1.07 [1.01- 1.12]        |        |
| ≥13                                                | 372 (82.67)         | 1.06 [1.00- 1.10]        |        |
| <b>Nationality</b>                                 |                     |                          |        |
| Kuwaiti                                            | 900 (83.26)         | 1 [Ref.]                 | <0.001 |
| Non-Kuwait                                         | 250 (74.63)         | 0.90 [0.82-0.96]         |        |
| <b>Governorate<sup>1</sup></b>                     |                     |                          |        |
| Capital                                            | 127 (81.41)         | 1 [Ref.]                 | 0.003  |
| Hawally                                            | 188 (76.42)         | 0.94 [0.82-1.03]         |        |
| Farawanya                                          | 183 (77.54)         | 0.95 [0.83-1.04]         |        |
| Jahra                                              | 214 (89.54)         | 1.10 [1.02-1.15]         |        |
| Mubarak al-Kabeer                                  | 124 (83.78)         | 1.03 [0.91-1.10]         |        |
| Ahmadi                                             | 296 (79.78)         | 0.98 [0.88-1.06]         |        |
| <b>Father's Education<sup>2</sup></b>              |                     |                          |        |
| Primary/Intermediate/no formal education           | 205 (86.86)         | 1 [Ref.]                 | <0.001 |
| Secondary (high school)                            | 297 (86.34)         | 0.99 [0.87-1.08]         |        |
| Diploma                                            | 220 (84.29)         | 0.95 [0.82-1.06]         |        |
| University & above                                 | 399 (73.62)         | 0.78 [0.65-0.90]         |        |
| <b>Mother's Education<sup>3</sup></b>              |                     |                          |        |
| Primary/Intermediate/no formal education           | 153 (83.61)         | 1 [Ref.]                 | <0.001 |
| Secondary (high school)                            | 263 (86.51)         | 1.04 [0.94-1.12]         |        |
| Diploma                                            | 259 (85.20)         | 1.02 [0.91-1.10]         |        |
| University & above                                 | 457 (75.54)         | 0.88 [0.76-0.99]         |        |
| <b>Total number of brother/sisters<sup>4</sup></b> |                     |                          |        |
| Zero-two                                           | 223 (74.83)         | 1 [Ref.]                 | 0.002  |
| Three-four                                         | 434 (80.67)         | 1.05 [1.00-1.10]         |        |
| Five or more                                       | 469 (84.81)         | 1.10 [1.04-1.13]         |        |
| <b>Passive smoking at household<sup>5</sup></b>    |                     |                          |        |
| No                                                 | 704 (78.14)         | 1 [Ref.]                 | <0.001 |
| Yes                                                | 426 (87.12)         | 1.11 [1.06-1.15]         |        |

|                                                               |               |      |             |        |
|---------------------------------------------------------------|---------------|------|-------------|--------|
| <b>Times per week consumed breakfast not prepared at home</b> |               |      |             |        |
| Zero                                                          | 484 (77.56)   | 1    | [Ref.]      | 0.019  |
| One-two times                                                 | 478 (84.01)   | 1.08 | [1.02-1.12] |        |
| Three-four                                                    | 98 (83.76)    | 1.07 | [0.97-1.14] |        |
| Five or more                                                  | 67 (85.90)    | 1.10 | [1.00-1.17] |        |
| <b>Times per week consumed dinner not prepared at home</b>    |               |      |             |        |
| Zero                                                          | 114 (72.61)   | 1    | [Ref.]      | 0.018  |
| One-two times                                                 | 719 (81.89)   | 1.09 | [1.03-1.14] |        |
| Three-four                                                    | 211 (82.10)   | 1.09 | [1.01-1.15] |        |
| Five or more                                                  | 75 (87.21)    | 1.14 | [1.04-1.19] |        |
| <b>Consumption of sugary drinks per week</b>                  |               |      |             |        |
| None                                                          | 123 (71.93)   | 1    | [Ref.]      | 0.002  |
| Once-Three times                                              | 633 (81.99)   | 1.09 | [1.04-1.14] |        |
| Four-Six                                                      | 135 (78.95)   | 1.07 | [0.98-1.13] |        |
| Seven/more                                                    | 256 (85.62)   | 1.12 | [1.07-1.17] |        |
| <b>Currently taking supplements<sup>5</sup></b>               |               |      |             |        |
| No                                                            | 1,045 (83.20) | 1    | [Ref.]      | <0.001 |
| Yes                                                           | 103 (65.19)   | 0.78 | [0.68-0.88] |        |
| <b>Number of times walking to school per week<sup>5</sup></b> |               |      |             |        |
| None                                                          | 982 (84.80)   | 1    | [Ref.]      | <0.001 |
| 1-8 times                                                     | 99 (63.87)    | 0.74 | [0.63-0.83] |        |
| Every day                                                     | 69 (66.99)    | 0.77 | [0.65-0.89] |        |
| <b>Time walking to school<sup>5</sup></b>                     |               |      |             |        |
| None                                                          | 982 (84.80)   | 1    | [Ref.]      | <0.001 |
| ≤5 minutes                                                    | 50 (62.50)    | 0.71 | [0.56-0.84] |        |
| 6- 10 minutes                                                 | 53 (69.74)    | 0.80 | [0.65-0.93] |        |
| 11-15                                                         | 38 (67.86)    | 0.77 | [0.60-0.92] |        |
| 16 minutes or more                                            | 26 (57.78)    | 0.65 | [0.46-0.82] |        |
| <b>Time spent on physical activity per week</b>               |               |      |             |        |
| Low                                                           | 396 (84.43)   | 1    | [Ref.]      | 0.005  |
| Medium                                                        | 391 (82.66)   | 0.97 | [0.89-1.04] |        |
| High                                                          | 363 (76.58)   | 0.89 | [0.80-0.96] |        |
| <b>Body Mass Index Categories<sup>6</sup></b>                 |               |      |             |        |
| Normal weight                                                 | 465 (77.37)   | 1    | [Ref.]      | 0.001  |
| Overweight                                                    | 270 (84.38)   | 1.07 | [1.02-1.11] |        |
| Obese                                                         | 400 (84.93)   | 1.08 | [1.03-1.11] |        |
| Under weight                                                  | 15 (62.50)    | 0.84 | [0.59-1.02] |        |

---

**Time outside per day 10:00 am- 4:00 pm  
week days**

|                             |             |                  |        |
|-----------------------------|-------------|------------------|--------|
| Less than 30 minutes        | 563 (85.69) | 1 [Ref.]         | <0.001 |
| 31 minutes to 1 hour        | 342 (76.00) | 0.87 [0.80-0.94] |        |
| More than 1 hour to 2 hours | 178 (80.18) | 0.93 [0.84-1.00] |        |
| More than 2 hours           | 67 (77.01)  | 0.88 [0.74-0.99] |        |

**Time outside per day 10:00 am- 4:00 pm  
week ends**

|                              |             |                  |       |
|------------------------------|-------------|------------------|-------|
| Less than 30 minutes         | 425 (86.03) | 1 [Ref.]         | 0.003 |
| 31 minutes to 1 hour         | 257 (82.37) | 0.94 [0.85-1.02] |       |
| More than 1 hour to 2 hours  | 198 (77.65) | 0.87 [0.76-0.96] |       |
| More than 2 hours to 3 hours | 142 (76.76) | 0.85 [0.74-0.96] |       |
| More than 3 hours            | 127 (75.15) | 0.83 [0.71-0.94] |       |

**Wearing sunscreen**

|              |             |                  |  |
|--------------|-------------|------------------|--|
| Never        | 874 (79.45) | 1 [Ref.]         |  |
| Rarely       | 65 (84.42)  | 1.06 [0.94-1.13] |  |
| Sometimes    | 140 (87.50) | 1.09 [1.02-1.14] |  |
| Often/always | 71 (89.87)  | 1.12 [1.02-1.18] |  |

**Staying in shade or under an umbrella**

|           |             |                  |  |
|-----------|-------------|------------------|--|
| Never     | 396 (80.32) | 1 [Ref.]         |  |
| Rarely    | 70 (72.16)  | 0.90 [0.78-1.01] |  |
| Sometimes | 301 (82.92) | 1.03 [0.96-1.08] |  |
| Often     | 162 (79.02) | 0.98 [0.90-1.05] |  |
| Always    | 220 (85.60) | 1.06 [0.99-1.11] |  |

---

<sup>1</sup>Missing for 20 participants; <sup>2</sup> Missing for 33 participants; <sup>3</sup> Missing for 20 participants; <sup>4</sup>Missing for 27 participants; <sup>5</sup> Missing for 2 participants; <sup>6</sup>Missing for 26 participants; <sup>7</sup> according to WHO growth charts.

Only

**STROBE 2007 (v4) checklist of items to be included in reports of observational studies in epidemiology\***  
**Checklist for cohort, case-control, and cross-sectional studies (combined)**

| Section/Topic             | Item # | Recommendation                                                                                                                                                                                                                                                                                                                                                                                                                                                         | Reported on page #         |
|---------------------------|--------|------------------------------------------------------------------------------------------------------------------------------------------------------------------------------------------------------------------------------------------------------------------------------------------------------------------------------------------------------------------------------------------------------------------------------------------------------------------------|----------------------------|
| Title and abstract        | 1      | (a) Indicate the study's design with a commonly used term in the title or the abstract                                                                                                                                                                                                                                                                                                                                                                                 | Page 1                     |
|                           |        | (b) Provide in the abstract an informative and balanced summary of what was done and what was found                                                                                                                                                                                                                                                                                                                                                                    | Page 3                     |
| <b>Introduction</b>       |        |                                                                                                                                                                                                                                                                                                                                                                                                                                                                        |                            |
| Background/rationale      | 2      | Explain the scientific background and rationale for the investigation being reported                                                                                                                                                                                                                                                                                                                                                                                   | Page 5                     |
| Objectives                | 3      | State specific objectives, including any pre-specified hypotheses                                                                                                                                                                                                                                                                                                                                                                                                      |                            |
| <b>Methods</b>            |        |                                                                                                                                                                                                                                                                                                                                                                                                                                                                        |                            |
| Study design              | 4      | Present key elements of study design early in the paper                                                                                                                                                                                                                                                                                                                                                                                                                |                            |
| Setting                   | 5      | Describe the setting, locations, and relevant dates, including periods of recruitment, exposure, follow-up, and data collection                                                                                                                                                                                                                                                                                                                                        | Page 6- Page 8 and Page 14 |
| Participants              | 6      | (a) <i>Cohort study</i> —Give the eligibility criteria, and the sources and methods of selection of participants. Describe methods of follow-up<br><i>Case-control study</i> —Give the eligibility criteria, and the sources and methods of case ascertainment and control selection. Give the rationale for the choice of cases and controls<br><i>Cross-sectional study</i> —Give the eligibility criteria, and the sources and methods of selection of participants | Page 6                     |
|                           |        | (b) <i>Cohort study</i> —For matched studies, give matching criteria and number of exposed and unexposed<br><i>Case-control study</i> —For matched studies, give matching criteria and the number of controls per case                                                                                                                                                                                                                                                 |                            |
| Variables                 | 7      | Clearly define all outcomes, exposures, predictors, potential confounders, and effect modifiers. Give diagnostic criteria, if applicable                                                                                                                                                                                                                                                                                                                               | Page 6 and Page 7          |
| Data sources/ measurement | 8*     | For each variable of interest, give sources of data and details of methods of assessment (measurement). Describe comparability of assessment methods if there is more than one group                                                                                                                                                                                                                                                                                   |                            |
| Bias                      | 9      | Describe any efforts to address potential sources of bias                                                                                                                                                                                                                                                                                                                                                                                                              |                            |
| Study size                | 10     | Explain how the study size was arrived at                                                                                                                                                                                                                                                                                                                                                                                                                              |                            |
| Quantitative variables    | 11     | Explain how quantitative variables were handled in the analyses. If applicable, describe which groupings were chosen and why                                                                                                                                                                                                                                                                                                                                           | Page 7 and Page 8          |
| Statistical methods       | 12     | (a) Describe all statistical methods, including those used to control for confounding                                                                                                                                                                                                                                                                                                                                                                                  | Page 7 and Page 8          |
|                           |        | (b) Describe any methods used to examine subgroups and interactions                                                                                                                                                                                                                                                                                                                                                                                                    | Page 7 and Page 8          |
|                           |        | (c) Explain how missing data were addressed                                                                                                                                                                                                                                                                                                                                                                                                                            |                            |
|                           |        | (d) <i>Cohort study</i> —If applicable, explain how loss to follow-up was addressed<br><i>Case-control study</i> —If applicable, explain how matching of cases and controls was addressed                                                                                                                                                                                                                                                                              | Page 8                     |

|                          |     |                                                                                                                                                                                                              |                                                |
|--------------------------|-----|--------------------------------------------------------------------------------------------------------------------------------------------------------------------------------------------------------------|------------------------------------------------|
|                          |     | <i>Cross-sectional study</i> —If applicable, describe analytical methods taking account of sampling strategy                                                                                                 |                                                |
|                          |     | (e) Describe any sensitivity analyses                                                                                                                                                                        |                                                |
| <b>Results</b>           |     |                                                                                                                                                                                                              |                                                |
| Participants             | 13* | (a) Report numbers of individuals at each stage of study—eg numbers potentially eligible, examined for eligibility, confirmed eligible, included in the study, completing follow-up, and analysed            | Page 8                                         |
|                          |     | (b) Give reasons for non-participation at each stage                                                                                                                                                         | Page 8                                         |
|                          |     | (c) Consider use of a flow diagram                                                                                                                                                                           |                                                |
| Descriptive data         | 14* | (a) Give characteristics of study participants (eg demographic, clinical, social) and information on exposures and potential confounders                                                                     | Table 1 page 9                                 |
|                          |     | (b) Indicate number of participants with missing data for each variable of interest                                                                                                                          | Table 1 , Table 2 and also supplementary table |
|                          |     | (c) <i>Cohort study</i> —Summarise follow-up time (eg, average and total amount)                                                                                                                             |                                                |
| Outcome data             | 15* | <i>Cohort study</i> —Report numbers of outcome events or summary measures over time                                                                                                                          |                                                |
|                          |     | <i>Case-control study</i> —Report numbers in each exposure category, or summary measures of exposure                                                                                                         |                                                |
|                          |     | <i>Cross-sectional study</i> —Report numbers of outcome events or summary measures                                                                                                                           | Page 10                                        |
| Main results             | 16  | (a) Give unadjusted estimates and, if applicable, confounder-adjusted estimates and their precision (eg, 95% confidence interval). Make clear which confounders were adjusted for and why they were included |                                                |
|                          |     | (b) Report category boundaries when continuous variables were categorized                                                                                                                                    | All tables                                     |
|                          |     | (c) If relevant, consider translating estimates of relative risk into absolute risk for a meaningful time period                                                                                             |                                                |
| Other analyses           | 17  | Report other analyses done—eg analyses of subgroups and interactions, and sensitivity analyses                                                                                                               | Page 12                                        |
| <b>Discussion</b>        |     |                                                                                                                                                                                                              |                                                |
| Key results              | 18  | Summarise key results with reference to study objectives                                                                                                                                                     | Page 13                                        |
| Limitations              | 19  | Discuss limitations of the study, taking into account sources of potential bias or imprecision. Discuss both direction and magnitude of any potential bias                                                   | Page 16                                        |
| Interpretation           | 20  | Give a cautious overall interpretation of results considering objectives, limitations, multiplicity of analyses, results from similar studies, and other relevant evidence                                   | Page 17                                        |
| Generalisability         | 21  | Discuss the generalisability (external validity) of the study results                                                                                                                                        | Page 17                                        |
| <b>Other information</b> |     |                                                                                                                                                                                                              |                                                |
| Funding                  | 22  | Give the source of funding and the role of the funders for the present study and, if applicable, for the original study on which the present article is based                                                | Page 18                                        |

\*Give information separately for cases and controls in case-control studies and, if applicable, for exposed and unexposed groups in cohort and cross-sectional studies.

1  
2  
3  
4 **Note:** An Explanation and Elaboration article discusses each checklist item and gives methodological background and published examples of transparent reporting. The STROBE  
5 checklist is best used in conjunction with this article (freely available on the Web sites of PLoS Medicine at <http://www.plosmedicine.org/>, Annals of Internal Medicine at  
6 <http://www.annals.org/>, and Epidemiology at <http://www.epidem.com/>). Information on the STROBE Initiative is available at [www.strobe-statement.org](http://www.strobe-statement.org).  
7  
8  
9  
10  
11  
12  
13  
14  
15  
16  
17  
18  
19  
20  
21  
22  
23  
24  
25  
26  
27  
28  
29  
30  
31  
32  
33  
34  
35  
36  
37  
38  
39  
40  
41  
42  
43  
44  
45  
46  
47

For peer review only

# BMJ Open

## Vitamin D Status among Adolescents in Kuwait: A Cross-sectional Study.

|                                 |                                                                                                                                                                                                                                                                                                                                                                                                                                                                                                                                                                   |
|---------------------------------|-------------------------------------------------------------------------------------------------------------------------------------------------------------------------------------------------------------------------------------------------------------------------------------------------------------------------------------------------------------------------------------------------------------------------------------------------------------------------------------------------------------------------------------------------------------------|
| Journal:                        | <i>BMJ Open</i>                                                                                                                                                                                                                                                                                                                                                                                                                                                                                                                                                   |
| Manuscript ID                   | bmjopen-2017-021401.R1                                                                                                                                                                                                                                                                                                                                                                                                                                                                                                                                            |
| Article Type:                   | Research                                                                                                                                                                                                                                                                                                                                                                                                                                                                                                                                                          |
| Date Submitted by the Author:   | 09-Mar-2018                                                                                                                                                                                                                                                                                                                                                                                                                                                                                                                                                       |
| Complete List of Authors:       | Al-Taiar, Abdullah; Faculty of Medicine, Kuwait University, Department of Community Medicine and Behavioural Sciences<br>Rahman , Abdur ; College of Life Sciences, Kuwait University, Department of Food Science and Nutrition<br>Al-Sabah, Reem; Faculty of Medicine, Kuwait University, Department of Community Medicine and Behavioural Sciences<br>Shaban, Lemia ; College of Life Sciences, Kuwait University, Department of Food Science and Nutrition<br>Al-Harbi, Anwar ; Kuwait Institute for Scientific Research , Department of Science and Nutrition |
| <b>Primary Subject Heading</b>: | Nutrition and metabolism                                                                                                                                                                                                                                                                                                                                                                                                                                                                                                                                          |
| Secondary Subject Heading:      | Epidemiology, Global health, Paediatrics, Public health                                                                                                                                                                                                                                                                                                                                                                                                                                                                                                           |
| Keywords:                       | PUBLIC HEALTH, Vitamin D, Adolescents, school children, Kuwait                                                                                                                                                                                                                                                                                                                                                                                                                                                                                                    |
|                                 |                                                                                                                                                                                                                                                                                                                                                                                                                                                                                                                                                                   |

SCHOLARONE™  
Manuscripts

only

## Vitamin D Status among Adolescents in Kuwait: A Cross-sectional Study.

Abdullah Al-Taiar<sup>1</sup>, Abdur Rahman<sup>2</sup>, Reem Al-Sabah<sup>1</sup>, Lemia Shaban<sup>2</sup>, Anwar Al-Harbi<sup>3</sup>

<sup>1</sup> Department of Community Medicine and Behavioural Sciences

Faculty of Medicine, Kuwait University,

Box: 24923 Safat-13110 Kuwait.

<sup>2</sup> Department of Food Science and Nutrition

College of Life Sciences, Kuwait University,

Box 5969, Safat-13060, Kuwait.

<sup>3</sup> Kuwait Institute for Scientific Research,

Department of Science and Nutrition,

Box: 24885 Safat-13109, Kuwait.

### **Before publication corresponding author:**

Dr Abdullah Al-Taiar

Associate Professor of Epidemiology

Department Community Medicine and Behavioural Sciences,

Faculty of Medicine, Kuwait University,

Box: 24923 Safat-13110 Kuwait.

Tel: +965-24986553

Fax: +965-5338948

E-mail: [altaiar@hsc.edu.kw](mailto:altaiar@hsc.edu.kw)



1  
2  
3 **After publication corresponding author:**  
4

5 Abdur Rahman

6 Associate Professor

7 Department of Food Science and Nutrition,  
8

9 College of Life Sciences, Kuwait University,  
10

11 Box: 5969 Safat-13060 Kuwait.  
12

13 Tel: +965-249633055  
14

15 Fax: +965-22513929  
16

17 E-mail: [abdurrahman.ahmad@ku.edu.kw](mailto:abdurrahman.ahmad@ku.edu.kw)  
18  
19  
20  
21  
22  
23  
24  
25  
26  
27  
28  
29  
30  
31  
32  
33  
34  
35  
36  
37  
38  
39  
40  
41  
42  
43  
44  
45  
46  
47  
48  
49  
50  
51  
52  
53  
54  
55  
56  
57  
58  
59  
60

## Abstract

### Objectives

In Kuwait, as in many Arab states in the gulf region, there are limited data on the prevalence of vitamin D deficiency among healthy adolescents. This study aimed to estimate the prevalence of vitamin D deficiency in a nationally representative sample of adolescents and investigate factors associated with vitamin D status.

### Methods

A cross-sectional study was conducted on 1416 adolescents aged 11-16 years, who were randomly selected from middle schools in all governorates of Kuwait. Data were collected from parents through self-administered questionnaire and from adolescents through face-to-face interview. Vitamin D was measured using liquid chromatography-tandem mass spectrometry (LC-MS/MS). Logistic regression was used to investigate the independent factors associated with vitamin D status.

### Results

The Prevalence of vitamin D deficiency was 1,150 (81.21%, 95%CI: 71.61-90.81%) while severe deficiency was 559 (39.48%). Only 51 (3.60%) were vitamin D sufficient. Prevalence was significantly higher among females compared to males (91.69% vs. 70.32%;  $p < 0.001$ ). There was a significant inverse correlation between vitamin D and PTH (Spearman correlation = -0.35;  $p < 0.001$ ). In the final model, gender, age, governorate, parental education, body mass index, vitamin D supplement and number of times walking to school per week were all significantly related to vitamin D deficiency.

### Conclusion

High prevalence of vitamin D deficiency was noted among adolescents in Kuwait despite the abundant sunshine which may reflect strong sun avoidance behavior. Adequate outdoor daytime activities should be encouraged especially for females. We call for locally tailored guidelines for vitamin D supplement in which females should have a higher dose compared to males.

**Keywords:** Vitamin D, adolescents, Kuwait, Middle East, school children

### Strengths and limitations of this study

- This is the first study that aimed to estimate the prevalence of vitamin D on a large nationally representative sample of adolescents in Kuwait.
- We measured vitamin D using the recommended laboratory methodology and gathered data from both parents and adolescents.
- We did not measure the skin color, which can be an important determinant for vitamin D synthesis in skin.

## Introduction

An optimal vitamin D status is extremely important during adolescence for proper growth and bone mineral accrual [1]. In addition to its critical role in bone health, several studies have linked vitamin D deficiency with various disease conditions during adolescence or adulthood such as asthma and allergies [2], type 2 diabetes [3], depression[4], cancer and even all-cause mortality [5]. However, the results of randomized control trials, which tested the impact of vitamin D supplement on the risk of these disease conditions, remain inconclusive.

Several studies have evaluated the prevalence of vitamin D deficiency and insufficiency during adolescence reporting high prevalence of vitamin D deficiency worldwide [6, 7]. This was the case even in countries with abundant sunshine, which is the main factor for endogenous vitamin D synthesis. For example, in India the prevalence of vitamin D deficiency among adolescents was reported to be 85-98% [8, 9] while in Saudi Arabia it was found to be around 96% [10]. In Arab states in the Gulf region or the broader Middle East, there is paucity of data on vitamin D status in pediatric and adolescents populations. The few studies that showed a high prevalence of vitamin D deficiency suffered from major methodological weaknesses [10-12]. These studies were small and hospital-based, lacked proper sampling technique or used less optimal laboratory method to measure vitamin D. It is also known that factors which influence vitamin D status such as avoiding sun exposure, skin pigmentation, high body mass index (BMI) and dietary factors, particularly the lack of vitamin D supplement and intake of vitamin D rich foods [13] are all on rise in Arab states in the Gulf region. The aim of the present study was therefore to assess vitamin D status among adolescents living in Kuwait, a country with a plenty of sun shine, and investigate factors associated with low vitamin D level.

## Methods

### Study population and study participants

Kuwait is a small country at latitude (29.3759° N) with a population of 4.2 million. Approximately 25% of population is under the age of 19-year. The study population comprised students in the age between 11 and 16 years in the public middle schools. School based cross-sectional study was conducted on students from 12 public middle schools that were selected using a stratified multistage cluster random sampling with a probability proportional to size from all governorates of Kuwait. The sample allocation in each governorate was based on the relative size of that governorate as judged by the total number of students in the governorate. Students with major chronic disease conditions are registered in each school and these were excluded from the study. However, students with minor illnesses or self-reported illness were included in the study. The type of illness was recorded during data collection and included in the analysis. The study was funded by Kuwait University and approved by The Ethics Committee at The Ministry of Health in Kuwait as well as The Ethics Committee at Health Sciences Centre, Kuwait University.

### Data Collection

An informed consent was sent to the parents along with a self-administered questionnaire on parents' level of education (No formal education, primary/intermediate, high school, diploma, university and above), income, type of housing, number of siblings of the index child, passive smoking at household and the number of times per week the index child had a meal prepared outside home during the last three months. After obtaining written informed consent from the parents and verbal consent from the school children, trained dedicated personnel carried out face-to-face interview with the students using a structured questionnaire. The questionnaire was carefully developed after extensive review of the literature and was pilot tested on 20 students who were not included in the study. It comprised questions on habitual sun exposure during the last three months, which was assessed by the core questions developed to measure

1  
2  
3 the exposure to sunlight in adolescents as described by Glanz et al. [14]; in addition to smoking habits,  
4 physical activity and dietary intake. Data on physical activity were collected using a questionnaire that was  
5 developed based on the Youth Physical Activity Questionnaire in UK [15] and The Arab teens lifestyle study  
6 [16]. The questionnaire was validated among high school students and showed strong correlation with data  
7 collected by accelerometers (Spearman correlation 0.92;  $p < 0.001$  for total steps count) (not published).  
8  
9 Data on dietary intake of vitamin D were collected from only 200 students using food frequency  
10 questionnaire for calcium and vitamin D intake in adolescents [17], which has been validated in our setting  
11 [18]. Food models or serving containers were used to assist in estimating serving size. Measurements of  
12 standing height and body weight of the study subjects were assessed using a digital weight and height scale  
13 (Detecto®) in a standardized manner.  
14  
15  
16  
17  
18  
19  
20  
21  
22  
23  
24

### 25 **Laboratory methods**

26  
27 Five ml of venous blood was collected in gel-containing tubes (SST II advance, BD vacutainer) from each  
28 child by a trained nurse; and the samples were protected from light. On the same day, the samples were  
29 centrifuged at 2000 x g for 15 minutes and the serum was transferred to Eppendorf tubes and stored at -  
30 80°C until analysis. Serum 25-hydroxyvitamin D (25-OH-D) concentration is the best marker of vitamin D  
31 status as it is the major circulating form of vitamin D, reflecting both the amount produced in the skin after  
32 sun exposure and the amount consumed in foods [19]. It was measured in College of American Pathologists  
33 CAP-accredited laboratory by liquid chromatography-tandem mass spectrometry (LC-MS/MS), which is the  
34 recommended method for vitamin D assessment in epidemiological studies [20]. According to the Endocrine  
35 Society [21] and the Society for Adolescent Health and Medicine [22], we used the following cut-off of 25-  
36 OH-D to define vitamin D status: vitamin D deficiency  $< 50$  nmol/L (20 ng/mL); vitamin D insufficiency 50-75  
37 nmol/L (20-30 ng/mL); and vitamin D sufficiency  $\geq 75$  nmol/L (30 ng/mL). Thus, hypovitaminosis D was  
38 defined in the presence of 25-OH-D levels  $< 75.0$  nmol/L (30 ng/mL). Furthermore, severe vitamin D  
39 deficiency was defined as 25-OH-D levels  $< 25.0$  nmol/L (10 ng/mL) [23]. Serum intact Parathyroid hormone  
40  
41  
42  
43  
44  
45  
46  
47  
48  
49  
50  
51  
52  
53  
54  
55  
56  
57  
58  
59  
60

1  
2  
3 (PTH) was measured using the Access Intact PTH chemiluminescent immunoassay with the Unicel Dxl 800  
4 Beckman Coulter analyzer using commercial kit (Cat. # A16972). Similar to other studies, PTH level  $\geq 65.0$   
5 ng/L was suggestive of hyperparathyroidism [24] although there is no consensus on this cut-off point.  
6  
7  
8  
9

### 10 11 12 **Patient and Public Involvement**

13  
14 Public were not directly involved in the design of this study. However, schools were involved in approaching  
15 the parents to obtain their consents. We also sent the results of the laboratory tests of each participant to  
16 the parents through schools using closed envelopes to ensure confidentiality.  
17  
18  
19  
20

### 21 **Data analysis**

22  
23 Data were double entered into specifically designed database using Epidata Entry. Data analysis was  
24 conducted using Stata (StataCorp. 2011. Release 12). BMI was calculated as weight (Kg) divided by height  
25 squared ( $m^2$ ). Weight status was categorized into normal, overweight and obese according to WHO growth  
26 charts. Chi-squared test was used to test differences in categorical variables. A modified version of multiple  
27 logistic regression that calculates prevalence ratio was used to study the association between each  
28 presumed risk factor and vitamin D deficiency (25-OH-D  $< 50$  nmol/L). This is because vitamin D deficiency  
29 was a common outcome and using log-binomial regression was not possible because the model failed to  
30 converge. Variables that were found to be statistically significant at 15% level of significance were  
31 considered in multivariate analysis. Variables were divided into groups (e.g. socio-demographic, sun  
32 exposure, etc) and were added sequentially to the model. Statistical significance of variables was evaluated  
33 by likelihood ratio test which compares the model with and without the variable. Goodness of fit of the final  
34 model was evaluated by Hosmer-Lemeshow test. Factors with  $p < 0.05$  were deemed to be statistically  
35 significant. The analysis above was repeated using hypovitaminosis (25-OH-D levels  $< 75.0$  nmol/L) as the  
36 binary outcome. We also conducted multiple linear regression analysis using vitamin D level as a  
37  
38  
39  
40  
41  
42  
43  
44  
45  
46  
47  
48  
49  
50  
51  
52  
53  
54  
55  
56  
57  
58  
59  
60

continuous outcome (after log-transformation) and reported the results in the text. Because of the complex structure of this survey data, we used survey method, which gives more precise estimates of standard error.

## Results

Of 1583 parents approached, 161 refused to participate (because children, parents or both refused).

Another 6 samples were not sufficient to conduct blood analysis, thus the analysis below comprised 1416 students. Table (1) shows the socio-demographic characteristics of the study group. The mean (SD) age was 12.48 (0.94) years and 694 (49.01%) were males.

Table (1). Socio-demographic characteristics of 1416 adolescents in public middle schools in Kuwait.

| <b>Characteristics</b>                              |  |          |            |
|-----------------------------------------------------|--|----------|------------|
| <b>Age in years, Mean (SD) years</b>                |  | 12.48    | 0.94       |
|                                                     |  | <b>n</b> | <b>(%)</b> |
| <b>Gender</b>                                       |  |          |            |
| Male                                                |  | 694      | (49.01)    |
| <b>Nationality</b>                                  |  |          |            |
| Kuwaiti                                             |  | 1,081    | (76.34)    |
| Non-Kuwait                                          |  | 335      | (23.66)    |
| <b>Father's Education<sup>1</sup></b>               |  |          |            |
| No formal education                                 |  | 15       | ( 1.08)    |
| Primary/Intermediate                                |  | 221      | (15.98)    |
| Secondary (high school)                             |  | 344      | (24.87)    |
| Diploma                                             |  | 261      | (18.87)    |
| University & above                                  |  | 542      | (39.19)    |
| <b>Mother's Education<sup>2</sup></b>               |  |          |            |
| No formal education                                 |  | 31       | ( 2.22)    |
| Primary/Intermediate                                |  | 152      | (10.89)    |
| Secondary (high school)                             |  | 304      | (21.78)    |
| Diploma                                             |  | 304      | (21.78)    |
| University & above                                  |  | 605      | (43.34)    |
| <b>Father's Income<sup>3</sup> (Kuwaiti Dinars)</b> |  |          |            |
| Less than 500                                       |  | 91       | ( 6.64)    |
| 500 to 1000                                         |  | 304      | (22.19)    |
| 1001 to 1500                                        |  | 421      | (30.73)    |
| 1501 to 2000                                        |  | 219      | (15.99)    |
| More than 2000                                      |  | 173      | (12.63)    |
| Do not wish to tell                                 |  | 162      | (11.82)    |
| <b>Mother's Employment Status<sup>4</sup></b>       |  |          |            |



---

|                            |             |
|----------------------------|-------------|
| Housewife                  | 488 (35.16) |
| Paid employment            | 680 (48.99) |
| Others                     | 220 (15.85) |
| <b>Housing<sup>5</sup></b> |             |
| Rented flat                | 510 (36.51) |
| Rented house               | 163 (11.67) |
| Owned flat                 | 59 (4.22)   |
| Owned house                | 665 (47.60) |

---

<sup>1</sup>Missing for 33 participants; <sup>2</sup> Missing for 20 participants; <sup>3</sup> Missing for 46 participants; <sup>4</sup>Missing for 28 participants;

<sup>5</sup>Missing for 19 participants

For peer review only

### Prevalence of vitamin D deficiency

The median (Interquartile Range, IQR) of 25-OH-D was 29.7 (19.2- 44.2) nmol/L. Prevalence of vitamin D deficiency was 1,150 (81.21%, 95%CI: 71.61-90.81%) while severe deficiency was 559 (39.48%). Only 51 (3.60%) participants were vitamin D sufficient. Prevalence of vitamin D was significantly higher among females compared to males (91.69% vs. 70.32%;  $p < 0.001$ ). Also, the median (IQR) of vitamin D was 39.8 (29.4- 52.7) nmol/L and 21.5 (14.7- 30.7) nmol/L among males and females, respectively ( $p < 0.001$ ). There was no difference in the prevalence of vitamin D deficiency between Kuwaitis and non-Kuwaitis after stratification by gender. There was significant inverse correlation between vitamin D and PTH (Spearman correlation = -0.35;  $p < 0.001$ ). In relation to vitamin D status, elevated PTH (secondary hyperparathyroidism PTH  $\geq 65$  ng/L. i.e. 6.89 pmol/L) was detected in 312 (55.81%), 185 (31.30%) and 59 (27.57%) of adolescents with vitamin D severe deficiency, deficiency and insufficiency, respectively. If we used the reference range of the laboratory where the samples were tested (PTH: 1.3-9.3 pmol/L), the prevalence of secondary hyperparathyroidism would be 182 (32.56%), 73 (12.35%), and 25 (11.68%) among adolescents with vitamin D severe deficiency, deficiency and insufficiency, respectively. The median (IQR) PTH was significantly different dependent on vitamin D status (severe deficiency 7.37 [5.44-10.55] pmol/L; deficiency 5.63[4.13-7.40] pmol/L; insufficiency 5.14[3.87-6.99] pmol/L; sufficiency 4.31[3.75- 5.73] pmol/L;  $p < 0.001$ ). The actual relationship between 25-OH-D and PTH levels is shown in figure (1).

Table (2): Factors associated with vitamin D deficiency in multivariate analysis, 1416 middle school students.

| Characteristics   | Prevalence of<br>vitamin D deficiency<br>n (%) | Prevalence Ratio<br>[95%CI] | P      |
|-------------------|------------------------------------------------|-----------------------------|--------|
| <b>Gender</b>     |                                                |                             |        |
| Male              | 488 (70.32)                                    | 1 [Ref.]                    | <0.001 |
| Female            | 662 (91.69)                                    | 1.20 [1.17- 1.21]           |        |
| <b>Age (year)</b> |                                                |                             |        |
| <12               | 409 (77.61)                                    | 1 [Ref.]                    | 0.003  |
| 12-               | 369 (84.05)                                    | 1.10 [1.04- 1.14]           |        |

|                                                               |               |      |              |        |
|---------------------------------------------------------------|---------------|------|--------------|--------|
| ≥13                                                           | 372 (82.67)   | 1.07 | [1.01- 1.12] |        |
| <b>Governorate<sup>1</sup></b>                                |               |      |              |        |
| Capital                                                       | 127 (81.41)   | 1    | [Ref.]       | <0.001 |
| Hawally                                                       | 188 (76.42)   | 0.88 | [0.73-1.01]  |        |
| Farawanya                                                     | 183 (77.54)   | 0.85 | [0.68-0.99]  |        |
| Jahra                                                         | 214 (89.54)   | 1.10 | [0.98-1.17]  |        |
| Mubarak al-Kabeer                                             | 124 (83.78)   | 1.06 | [0.93-1.14]  |        |
| Ahmadi                                                        | 296 (79.78)   | 1.06 | [0.95-1.13]  |        |
| <b>Father's Education<sup>2</sup></b>                         |               |      |              |        |
| Primary/Intermediate/no formal education                      | 205 (86.86)   | 1    | [Ref.]       | <0.009 |
| Secondary (high school)                                       | 297 (86.34)   | 1.04 | [0.92-1.12]  |        |
| Diploma                                                       | 220 (84.29)   | 1.01 | [0.88-1.10]  |        |
| University & above                                            | 399 (73.62)   | 0.89 | [0.76-1.01]  |        |
| <b>Passive smoking in household<sup>3</sup></b>               |               |      |              |        |
| No                                                            | 704 (78.14)   | 1    | [Ref.]       | <0.006 |
| Yes                                                           | 426 (87.12)   | 1.08 | [1.02-1.13]  |        |
| <b>Currently taking supplements<sup>4</sup></b>               |               |      |              |        |
| No                                                            | 1,045 (83.20) | 1    | [Ref.]       | <0.001 |
| Yes                                                           | 103 (65.19)   | 0.63 | [0.49-0.76]  |        |
| <b>Consumption of sugary drinks per week</b>                  |               |      |              |        |
| None                                                          | 123 (71.93)   | 1    | [Ref.]       | 0.002  |
| Once-Three times                                              | 633 (81.99)   | 1.11 | [1.05-1.16]  |        |
| Four-Six times                                                | 135 (78.95)   | 1.07 | [0.96-1.14]  |        |
| Seven/more times                                              | 256 (85.62)   | 1.15 | [1.08-1.19]  |        |
| <b>Number of times walking to school per week<sup>5</sup></b> |               |      |              |        |
| None                                                          | 982 (84.80)   | 1    | [Ref.]       | <0.001 |
| 1-8 times                                                     | 99 (63.87)    | 0.81 | [0.68-0.93]  |        |
| Every day                                                     | 69 (66.99)    | 0.77 | [0.61-0.92]  |        |
| <b>Body Mass Index Categories<sup>6</sup></b>                 |               |      |              |        |
| Normal weight                                                 | 465 (77.37)   | 1    | [Ref.]       | 0.001  |
| Overweight                                                    | 270 (84.38)   | 1.08 | [1.01-1.13]  |        |
| Obese                                                         | 400 (84.93)   | 1.12 | [1.07-1.16]  |        |
| Underweight                                                   | 15 (62.50)    | 0.93 | [0.67-1.10]  |        |

<sup>1</sup>Missing for 20 participants; <sup>2</sup> Missing for 33 participants; <sup>3</sup>Missing for 26 participants; <sup>4</sup> Missing for 2 participants; <sup>5</sup> Missing for 26 participants; <sup>6</sup> according to WHO growth charts.

### Factors associated with vitamin D status

Factors that showed significant association with vitamin D deficiency (25-OH-D < 50 nmol/L) in univariate analysis are shown in Supplementary Table. Table (2) shows the independent predictors for vitamin D deficiency in multivariate analysis. In the final model, gender, age, governorate, parental education, vitamin D supplement, and the number of times participant walks to school per week were all significantly related to vitamin D deficiency. Data from the food frequency questionnaire for calcium and vitamin D intake were available only for 200 study subjects, and of all food items, only eggs were significantly related to vitamin D deficiency in multivariate model (data not shown). We repeated the analysis above using hypovitaminosis (sufficient vs. insufficient/deficient) as a binary outcome. The same factors were found to be significantly related to hypovitaminosis, although mother's education (instead of father's education) was found to be significant in this analysis. We also used linear regression to identify the factors associated with vitamin D level as a continuous variable. Factors that showed significant association with vitamin D level in multivariate analysis were age, gender, governorate, passive smoking at household, number of times of having breakfast meal outside home in the last three months, time spent outdoor during weekdays, preference to stay in shade or under the umbrella, and BMI categories. With respect to dietary factors, milk and cheese, fast food hamburger and tuna fish were significantly associated with vitamin D level in univariate linear regression. When these food items were introduced to the final model, only milk and tuna fish were significantly associated with vitamin D level. It is worth noting that in this analysis the best model was able to explain only 45% of the variability in vitamin D level.

### Discussion

Although several reports have described vitamin D deficiency among adults in the Arab states in the Gulf region, there are limited data on the prevalence of vitamin D deficiency among healthy adolescents. Our study used a nationally representative sample to examine a large number of healthy adolescents, becoming to our knowledge the largest study focusing on this group in Kuwait. We used the recommended

1  
2  
3 method to measure vitamin D level and demonstrated that vitamin D deficiency is too common despite the  
4 abundant sunshine. Secondary hyperparathyroidism due to vitamin D deficiency is also common and  
5 females had lower vitamin D level compared to males.  
6  
7  
8  
9

10  
11 In our setting, approximately, 81% and 15% of adolescents were vitamin D deficient or insufficient,  
12 respectively. This is higher than that reported among adolescents in European countries [25-27],  
13 Southeastern United States [28, 29] or New Zealand [30]. Our finding is more akin to that reported from  
14 Saudi Arabia (95.6%) [10], India (85-98%) [8, 9], or Korea where only 2.3% of adolescents were found to be  
15 vitamin D sufficient [31]. Our findings are also in accordance with the high prevalence reported consistently  
16 among adult population in Kuwait [32] or other countries in the Gulf region such as Saudi Arabia [33],  
17 Bahrain [34] and Qatar [35].  
18  
19  
20  
21  
22  
23  
24  
25  
26  
27

28 Similar to other studies among adolescents [24, 28, 36], our findings showed that large number of those with  
29 low vitamin D level had evidence of secondary hyperparathyroidism. We reported a much higher prevalence  
30 of secondary hyperparathyroidism compared to other studies [24, 36], which could be due to using lower  
31 PTH cut-off point to define secondary hyperthyroidism or using different laboratory method to measure PTH.  
32 Hyperparathyroidism, which potentially lead to increased bone resorption, is particularly important during  
33 adolescence because it is the critical period to achieve Peak Bone Mass. Serum PTH decreased as 25-OH-  
34 D level increased with no clear threshold of serum 25-OH-D at which PTH level plateaued although very few  
35 participants had elevated PTH when 25-OH-D level was above 75 nmol/L (Figure 1). Although we did not  
36 measure markers of bone turnover, this provides an additional evidence that 25-OH-D should be maintained  
37 above 75 nmol/L, which is the current cut-off point used to define vitamin D sufficiency in adolescents [21,  
38 22].  
39  
40  
41  
42  
43  
44  
45  
46  
47  
48  
49  
50  
51  
52  
53  
54  
55  
56  
57  
58  
59  
60

1  
2  
3 Because of the abundant sunshine in the Arab states in the Gulf region, there has been a lot of skepticism  
4 of vitamin D deficiency. Informal discussions, even among scientific community, in the region show strong  
5 denial attributing such low levels of vitamin D to poorly executed or faulty laboratory measurements, or any  
6 other reason. Our findings should eliminate doubts on vitamin D deficiency among adolescents in Kuwait  
7 and pave the way to look for practical solutions. Factors that may hinder cutaneous synthesis of vitamin D  
8 despite abundant sunshine may include dust storms (occur almost in one third of the year in Kuwait [37])  
9 and an avoidance of sun exposure by indoor lifestyle, head covering or other cultural practices in addition to  
10 the use of sunscreen. Self-reported exposure to sunlight was a significant predictor for vitamin D deficiency  
11 in univariate analysis but lost statistical significance in multivariate analysis. Most of adolescents in our  
12 setting avoid sunlight as only around 6% of the participants spent more than two hours outdoor per day  
13 between 10:00 am and 4:00 pm during weekdays (data not shown). Avoidance of sunlight has been  
14 suggested to be the underlying reason for the counterintuitive seasonal variation that has been reported in  
15 the region, in which the prevalence of vitamin D deficiency is higher in the summer compared to the winter  
16 season [36]. Owing to the desert climate, avoiding sun exposure would be stronger during summer due to  
17 extremely high temperature. We collected blood samples in February, March and April and thus we were  
18 unable to describe seasonal variation in vitamin D status. Exposure to sunlight contributes up to 90–95% of  
19 the vitamin D supply, while the number of foods naturally containing a significant quantity of vitamin D is  
20 very limited except for some oily fish that is rarely consumed by adolescents worldwide and in our setting  
21 [38] (~5% of adolescents in our setting consumed salmon once per week or more). As such, education of  
22 the parents and adolescents on the safe amount of sun exposure in addition to changes in the school  
23 environment to facilitate exposure to sunlight may produce the highest impact on vitamin D status among  
24 adolescents. There is no consensus on the amount of time in which adolescents can safely be exposed to  
25 direct sunlight. However, exposure of legs and arms for at least 15 minutes two times per week has been  
26 reported to be sufficient for adequate sun-induced cutaneous vitamin D synthesis in adolescents [38].  
27  
28  
29  
30  
31  
32  
33  
34  
35  
36  
37  
38  
39  
40  
41  
42  
43  
44  
45  
46  
47  
48  
49  
50  
51  
52  
53  
54  
55  
56  
57  
58  
59  
60

1  
2  
3  
4 Like several studies that investigated vitamin D deficiency among adolescents, females had a significantly  
5  
6 higher prevalence of vitamin D deficiency compared to males even after adjusting for all potential  
7  
8 confounders. Also, vitamin D level was significantly lower among females compared to males. This is similar  
9  
10 to that reported among adolescents from Saudi Arabia [39], India [9], Korea [31] and Taiwan [40]. This  
11  
12 pattern is not common in other settings as reported from a clinic-based cross-sectional study in the US [28]  
13  
14 or Italy [26]. In the Arab states in the Gulf region and India, cultural practices, such as type of clothing that  
15  
16 covers the whole body and indoor lifestyle, have been proposed to exacerbate vitamin D deficiency among  
17  
18 females. Indeed, we found males consistently reporting higher amount of outdoor exposure to sunlight  
19  
20 compared to females. In addition, females reported consistently higher sun avoidance behavior such as  
21  
22 using sunscreen and staying in shade or under an umbrella. Adjusting for the exposure to sunlight did not  
23  
24 explain the whole association between vitamin D status and gender which could be due to residual  
25  
26 confounding. We also collected data on the type of clothing among females using photo cards (no head  
27  
28 covering, head covering, head and face covering), but vitamin D deficiency was too common among  
29  
30 females, which did not allow for us to investigate the impact of type of dress on vitamin D status among  
31  
32 females. In our setting, efforts to improve vitamin D level among adolescents should focus on females  
33  
34 through encouragement of safe amount of exposure to sunlight and intake of vitamin D rich foods. Also the  
35  
36 current recommended doses for vitamin D supplement should take the difference between females and  
37  
38 males into account and recommend higher doses for females compared to males.  
39  
40  
41  
42  
43

44 Most of the students in Kuwait do not walk to school and are mainly transported using cars or school buses.  
45  
46 The number of times student walk to/from school as well as the time spent on walking to/from school was  
47  
48 significantly associated with vitamin D deficiency. Those who walk to/from schools were less likely to have  
49  
50 vitamin D deficiency compared to those who used school bus or cars. Walking to schools can be a good  
51  
52 opportunity for sunlight exposure but also as a physical activity itself may improve vitamin D level. In a  
53  
54 study in the US, physical activity was inversely associated with hypovitaminosis D but not related to vitamin  
55  
56

1  
2  
3 D level [28] while in another study, vigorous physical activity was significantly associated with vitamin D  
4 level [29]. It has been proposed that physical activity may increase the level of vitamin D through increasing  
5 the time spent outdoor in sunlight or through reducing the risk of obesity [13]. However, in our study the total  
6 time spent on other physical/sport activities was significantly associated with vitamin D deficiency in  
7 univariate but not in multivariate analysis. Unlike walking to the schools, most sport activities in our setting  
8 are practiced indoor or during night time due to severe hot weather which may explain the lack of  
9 association between total time spent on physical activities and vitamin D deficiency in multivariate analysis.  
10 Like many other studies [25, 28, 31], BMI was inversely associated with vitamin D level, which has been  
11 attributed to sequestration of the this fat-soluble vitamin within the plentiful adipose tissue [41, 42]. It has  
12 also been suggested that leptin, an adipocyte-derived hormone, might activate a pathway that inhibits renal  
13 synthesis of the active form of vitamin D [43].  
14  
15  
16  
17  
18  
19  
20  
21  
22  
23  
24  
25  
26  
27  
28  
29

30 In our study, sugary drinks were positively associated with the prevalence of vitamin D deficiency. This is  
31 similar to that reported from Saudi Arabia [36] and US [28]. Consumption of sugary drinks among  
32 adolescents usually occurs at the expense of milk consumption which contains vitamin D [44]. As a result, it  
33 has been proposed that presence of vitamin D-fortified juices may help to reduce vitamin D deficiency in  
34 adolescents [28]. In our data those who consumed sugary drinks were less likely to consume milk (data not  
35 shown). Although milk consumption was not related to vitamin D deficiency it was significantly related to the  
36 vitamin D level in linear regression analysis.  
37  
38  
39  
40  
41  
42  
43  
44  
45  
46  
47  
48  
49  
50  
51  
52  
53  
54  
55  
56  
57  
58  
59  
60

We found an association between passive smoking at household (reported by parents) and vitamin D  
deficiency among adolescents, which is interesting and has been reported before [40]. Only less than 1% of  
the adolescents in our setting reported active smoking. Smoking has also been reported to be a significant  
determinant for low vitamin D level among adults in some studies [27] but not in others [45] and this issue  
remains controversial [27]. Furthermore, a recent study found no significant association between cotinine



1  
2  
3 level and vitamin D deficiency among Korean adolescents [31]. One of the hypothesized mechanism is that  
4 smoking may reflect a less healthy life style including less physical activity and poor dietary habits [27] but  
5 also a causal link has been proposed as metabolites in cigarette's smoke can inhibit CYP27A1 activity [46].  
6  
7  
8  
9

## 10 Strengths and limitation

11  
12 This is the first study that measured vitamin D in a large nationally representative sample of adolescents in  
13 Kuwait. We used a measurement method that is recommended for epidemiological studies and gathered  
14 data from both parents and adolescents. However, we did not measure the skin color, which can be an  
15 important determinant for vitamin D formulation in skin during exposure to sunlight. Furthermore, there were  
16 adolescents with low vitamin D concentration which was not accompanied by secondary  
17 hyperparathyroidism (Figure 1). This has been noted in other studies [28, 36], the clinical significance of  
18 which is unknown in children and deserves further study. We evaluated the dietary intake of vitamin D in  
19 only a subgroup of study participants. However, dietary intake of vitamin D is known to have a smaller  
20 contribution to vitamin D status compared to cutaneous synthesis in response to sun exposure [38] and data  
21 on vitamin D supplement were obtained from all participants.  
22  
23  
24  
25  
26  
27  
28  
29  
30  
31  
32  
33  
34

## 35 Conclusion

36  
37 In conclusion, a high prevalence of vitamin D deficiency was noted among adolescents in Kuwait despite the  
38 abundant sunshine. This may reflect strong sun avoidance behavior as only less than 4% of adolescents  
39 were vitamin D sufficient and most of them were on vitamin D supplements. An optimal vitamin D level is  
40 essential during adolescence; and vitamin D deficiency at this age represents a public health problem that  
41 should be addressed. First, our findings should help clear doubts on vitamin D deficiency among  
42 adolescents in Kuwait, which is a prerequisite for prevention initiatives. Second, sun exposure is the main  
43 source for vitamin D in this age group; therefore adequate outdoor daytime activities should be encouraged  
44 especially for females. Slight modifications in school environment to facilitate exposure to sunlight during  
45 school breaks between classes can be fruitful. With respect to vitamin D supplementation, we call for locally  
46  
47  
48  
49  
50  
51  
52  
53  
54  
55

1  
2  
3 tailored guidelines in which females should have a higher amount of vitamin D supplement compared to  
4  
5 males. Vitamin D fortification particularly for food products that are popular for adolescents in our setting  
6  
7 should also be considered. Increasing exposure to sunlight and vitamin D food fortification should not be  
8  
9 considered mutually exclusive and both strategies can be adopted.  
10

## 11 12 13 **Acknowledgements**

14 The authors acknowledge the assistance of Nadien Sameeh Rushdi and the team of data collectors. We  
15  
16 also acknowledge the cooperation of all participating schools and the facilitation of the project by the  
17  
18 Ministry of Education. We also appreciate the support and cooperation of the staff and management of The  
19  
20 United Genetics Laboratories (Kuwait) in vitamin D analysis.  
21  
22  
23  
24

## 25 26 **Authors' contributions**

27 AT contributed to the study design and data collection, analyzed the data and drafted the paper. He had full  
28  
29 access to all the data and took responsibility for the integrity of the data. AR contributed to the design of the  
30  
31 study and data collection in addition to the writing and revising the manuscript. RS and LS contributed to the  
32  
33 design of the study and data collection in addition to revising the manuscript with significant intellectual  
34  
35 input. AH contributed to the data collection and revised the manuscript.  
36  
37  
38  
39

40 **Funding:** The study was supported and funded by Kuwait University, Research Sector (Project No. WF  
41  
42 02/13).  
43

44 **Competing interests:** The authors declare that they have no competing interests  
45  
46  
47

48 **Data sharing statement:** No additional data are available.  
49  
50  
51  
52  
53  
54  
55

## References

- 1 Mouratidou T, Vicente-Rodriguez G, Gracia-Marco L, *et al.* Associations of dietary calcium, vitamin D, milk intakes, and 25-hydroxyvitamin D with bone mass in Spanish adolescents: the HELENA study. *Journal of clinical densitometry : the official journal of the International Society for Clinical Densitometry* 2013;**16**:110-7.
- 2 Sharief S, Jariwala S, Kumar J, *et al.* Vitamin D levels and food and environmental allergies in the United States: results from the National Health and Nutrition Examination Survey 2005-2006. *The Journal of allergy and clinical immunology* 2011;**127**:1195-202.
- 3 Lucato P, Solmi M, Maggi S, *et al.* Low vitamin D levels increase the risk of type 2 diabetes in older adults: A systematic review and meta-analysis. *Maturitas* 2017;**100**:8-15.
- 4 Bahrami A, Mazloum SR, Maghsoudi S, *et al.* High Dose Vitamin D Supplementation Is Associated With a Reduction in Depression Score Among Adolescent Girls: A Nine-Week Follow-Up Study. *Journal of dietary supplements* 2017:1-10.
- 5 Chowdhury R, Kunutsor S, Vitezova A, *et al.* Vitamin D and risk of cause specific death: systematic review and meta-analysis of observational cohort and randomised intervention studies. *BMJ (Clinical research ed)* 2014;**348**:g1903.
- 6 Hilger J, Friedel A, Herr R, *et al.* A systematic review of vitamin D status in populations worldwide. *The British journal of nutrition* 2014;**111**:23-45.
- 7 Basatemur E, Horsfall L, Marston L, *et al.* Trends in the Diagnosis of Vitamin D Deficiency. *Pediatrics* 2017;**139**.
- 8 Garg MK, Marwaha RK, Khadgawat R, *et al.* Efficacy of vitamin D loading doses on serum 25-hydroxy vitamin D levels in school going adolescents: an open label non-randomized prospective trial. *Journal of pediatric endocrinology & metabolism : JPEM* 2013;**26**:515-23.
- 9 Kapil U, Pandey RM, Goswami R, *et al.* Prevalence of Vitamin D deficiency and associated risk factors among children residing at high altitude in Shimla district, Himachal Pradesh, India. *Indian journal of endocrinology and metabolism* 2017;**21**:178-83.
- 10 AlBuhairan FS, Tamim H, Al Dubayee M, *et al.* Time for an Adolescent Health Surveillance System in Saudi Arabia: Findings From "Jeeluna". *The Journal of adolescent health : official publication of the Society for Adolescent Medicine* 2015;**57**:263-9.
- 11 Kaddam IM, Al-Shaikh AM, Abaalkhail BA, *et al.* Prevalence of vitamin D deficiency and its associated factors in three regions of Saudi Arabia. *Saudi medical journal* 2017;**38**:381-90.
- 12 Mansour MM, Alhadidi KM. Vitamin D deficiency in children living in Jeddah, Saudi Arabia. *Indian journal of endocrinology and metabolism* 2012;**16**:263-9.
- 13 Valtuena J, Gonzalez-Gross M, Huybrechts I, *et al.* Factors associated with vitamin D deficiency in European adolescents: the HELENA study. *Journal of nutritional science and vitaminology* 2013;**59**:161-71.
- 14 Glanz K, Yaroch AL, Dancel M, *et al.* Measures of sun exposure and sun protection practices for behavioral and epidemiologic research. *Archives of dermatology* 2008;**144**:217-22.
- 15 UEA. Youth Physical Activity Questionnaire. University of East Anglia 2011.

- 1  
2  
3 16 Al-Hazzaa HM, Al-Sobayel HI, Musaiger AO. Convergent validity of the Arab Teens Lifestyle Study (ATLS) physical activity questionnaire. *International journal of environmental research and public health* 2011;**8**:3810-20.  
4  
5  
6 17 Taylor C, Lamparello B, Kruczek K, *et al.* Validation of a food frequency questionnaire for determining calcium and vitamin D intake by adolescent girls with anorexia nervosa. *Journal of the American Dietetic Association* 2009;**109**:479-85, 85 e1-3.  
7  
8  
9  
10 18 Papandreou D, achaniotis N, Lari M, *et al.* Validation of a Food Frequency Questionnaire for Vitamin D and Calcium Intake in Healthy Female College Students. *Food and Nutrition Sciences* 2014;**5**:2048-52.  
11  
12  
13 19 Holick MF. Vitamin D deficiency. *The New England journal of medicine* 2007;**357**:266-81.  
14  
15 20 Vogeser M. Quantification of circulating 25-hydroxyvitamin D by liquid chromatography-tandem mass spectrometry. *The Journal of steroid biochemistry and molecular biology* 2010;**121**:565-73.  
16  
17 21 Holick MF, Binkley NC, Bischoff-Ferrari HA, *et al.* Evaluation, treatment, and prevention of vitamin D deficiency: an Endocrine Society clinical practice guideline. *The Journal of clinical endocrinology and metabolism* 2011;**96**:1911-30.  
18  
19  
20  
21 22 Medicine SfAHa. Recommended vitamin D intake and management of low vitamin D status in adolescents: a position statement of the society for adolescent health and medicine. *The Journal of adolescent health : official publication of the Society for Adolescent Medicine* 2013;**52**:801-3.  
22  
23  
24 23 Braegger C, Campoy C, Colomb V, *et al.* Vitamin D in the healthy European paediatric population. *Journal of pediatric gastroenterology and nutrition* 2013;**56**:692-701.  
25  
26  
27 24 Vierucci F, Del Pistoia M, Fanos M, *et al.* Prevalence of hypovitaminosis D and predictors of vitamin D status in Italian healthy adolescents. *Italian journal of pediatrics* 2014;**40**:54.  
28  
29  
30  
31 25 Gonzalez-Gross M, Valtuena J, Breidenassel C, *et al.* Vitamin D status among adolescents in Europe: the Healthy Lifestyle in Europe by Nutrition in Adolescence study. *The British journal of nutrition* 2012;**107**:755-64.  
32  
33  
34 26 Vierucci F, Del Pistoia M, Fanos M, *et al.* Vitamin D status and predictors of hypovitaminosis D in Italian children and adolescents: a cross-sectional study. *European journal of pediatrics* 2013;**172**:1607-17.  
35  
36  
37 27 Kassi EN, Stavropoulos S, Kokkoris P, *et al.* Smoking is a significant determinant of low serum vitamin D in young and middle-aged healthy males. *Hormones (Athens, Greece)* 2015;**14**:245-50.  
38  
39  
40 28 Gordon CM, DePeter KC, Feldman HA, *et al.* Prevalence of vitamin D deficiency among healthy adolescents. *Archives of pediatrics & adolescent medicine* 2004;**158**:531-7.  
41  
42  
43 29 Dong Y, Pollock N, Stallmann-Jorgensen IS, *et al.* Low 25-hydroxyvitamin D levels in adolescents: race, season, adiposity, physical activity, and fitness. *Pediatrics* 2010;**125**:1104-11.  
44  
45  
46 30 Rockell JE, Green TJ, Skeaff CM, *et al.* Season and ethnicity are determinants of serum 25-hydroxyvitamin D concentrations in New Zealand children aged 5-14 y. *The Journal of nutrition* 2005;**135**:2602-8.  
47  
48  
49 31 Byun EJ, Heo J, Cho SH, *et al.* Suboptimal vitamin D status in Korean adolescents: a nationwide study on its prevalence, risk factors including cotinine-verified smoking status and association with atopic dermatitis and asthma. *BMJ open* 2017;**7**:e016409.  
50  
51  
52 32 Zhang FF, Al Hooti S, Al Zenki S, *et al.* Vitamin D deficiency is associated with high prevalence of diabetes in Kuwaiti adults: results from a national survey. *BMC public health* 2016;**16**:100.  
53  
54  
55

- 1  
2  
3 33 Al-Daghri NM. Vitamin D in Saudi Arabia: Prevalence, distribution and disease associations. *The Journal of steroid biochemistry and molecular biology* 2016.
- 4  
5  
6 34 Golbahar J, Al-Saffar N, Altayab Diab D, *et al.* Predictors of vitamin D deficiency and insufficiency in adult Bahrainis: a cross-sectional study. *Public health nutrition* 2014;**17**:732-8.
- 7  
8  
9 35 Mahdy S, Al-Emadi SA, Khanjar IA, *et al.* Vitamin D status in health care professionals in Qatar. *Saudi medical journal* 2010;**31**:74-7.
- 10  
11  
12 36 Sulimani RA, Mohammed AG, Alfadda AA, *et al.* Vitamin D deficiency and biochemical variations among urban Saudi adolescent girls according to season. *Saudi medical journal* 2016;**37**:1002-8.
- 13  
14  
15 37 Thalib L, Al-Taiar A. Dust storms and the risk of asthma admissions to hospitals in Kuwait. *The Science of the total environment* 2012;**433**:347-51.
- 16  
17  
18 38 Holick MF. The D-lightful vitamin D for child health. *JPEN Journal of parenteral and enteral nutrition* 2012;**36**:9S-19S.
- 19  
20  
21 39 Al-Daghri NM, Al-Saleh Y, Aljohani N, *et al.* Vitamin D Deficiency and Cardiometabolic Risks: A Juxtaposition of Arab Adolescents and Adults. *PloS one* 2015;**10**:e0131315.
- 22  
23  
24 40 Yao TC, Tu YL, Chang SW, *et al.* Suboptimal vitamin D status in a population-based study of Asian children: prevalence and relation to allergic diseases and atopy. *PloS one* 2014;**9**:e99105.
- 25  
26  
27 41 Wortsman J, Matsuoka LY, Chen TC, *et al.* Decreased bioavailability of vitamin D in obesity. *The American journal of clinical nutrition* 2000;**72**:690-3.
- 28  
29  
30 42 Walker GE, Ricotti R, Roccio M, *et al.* Pediatric obesity and vitamin D deficiency: a proteomic approach identifies multimeric adiponectin as a key link between these conditions. *PloS one* 2014;**9**:e83685.
- 31  
32  
33 43 Tsuji K, Maeda T, Kawane T, *et al.* Leptin stimulates fibroblast growth factor 23 expression in bone and suppresses renal 1 $\alpha$ ,25-dihydroxyvitamin D<sub>3</sub> synthesis in leptin-deficient mice. *J Bone Miner Res* 2010;**25**:1711-23.
- 34  
35  
36 44 O'Connor TM, Yang SJ, Nicklas TA. Beverage intake among preschool children and its effect on weight status. *Pediatrics* 2006;**118**:e1010-8.
- 37  
38  
39 45 Scragg R, Holdaway I, Jackson R, *et al.* Plasma 25-hydroxyvitamin D<sub>3</sub> and its relation to physical activity and other heart disease risk factors in the general population. *Annals of epidemiology* 1992;**2**:697-703.
- 40  
41  
42 46 Aboraia AS, Makowski B, Bahja A, *et al.* Synthesis and CYP24A1 inhibitory activity of (E)-2-(2-substituted benzylidene)- and 2-(2-substituted benzyl)-6-methoxy-tetralones. *European journal of medicinal chemistry* 2010;**45**:4427-34.
- 43  
44  
45  
46  
47  
48  
49  
50  
51  
52  
53  
54  
55  
56  
57  
58  
59  
60

## Figure legends

**Figure (1):** Parathyroid hormone (PTH) with Serum 25-hydroxyvitamin D (25-OH-D) concentration. Individuals above the horizontal line ( $\text{PTH} \geq 65.0 \text{ ng/L}$ ) are adolescents with secondary hyperthyroidism. Vertical lines represent the 25-OH-D cut-off used to define vitamin D deficiency, insufficiency and sufficiency (seven participants with  $25\text{-OH-D} > 150 \text{ nmol/L}$  were omitted).

For peer review only

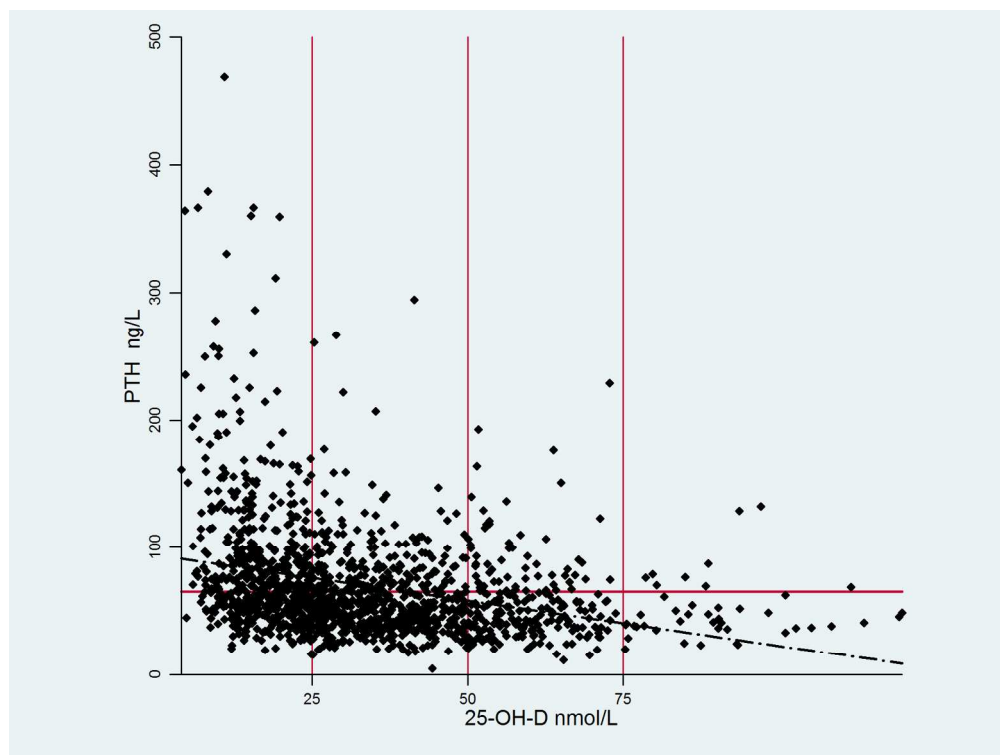

Figure (1): Parathyroid hormone (PTH) with Serum 25-hydroxyvitamin D (25-OH-D) concentration. Individuals above the horizontal line (PTH  $\geq$  65.0 ng/L) are adolescents with secondary hyperthyroidism. Vertical lines represent the 25-OH-D cut-off used to define vitamin D deficiency, insufficiency and sufficiency (seven participants with 25-OH-D > 150 nmol/L were omitted).

705x529mm (72 x 72 DPI)

only

Supplementary Table (1). Factors associated with vitamin D deficiency in univariate analysis, 1416 middle school students.

| Characteristics                                    | Prevalence of<br>vitamin D deficiency |         | Prevalence Ratio<br>[95%CI] | p      |
|----------------------------------------------------|---------------------------------------|---------|-----------------------------|--------|
|                                                    | n                                     | (%)     |                             |        |
| <b>Gender</b>                                      |                                       |         |                             |        |
| Male                                               | 488                                   | (70.32) | 1 [Ref.]                    | <0.001 |
| Female                                             | 662                                   | (91.69) | 1.30 [1.26- 1.33]           |        |
| <b>Age (year)</b>                                  |                                       |         |                             |        |
| <12                                                | 409                                   | (77.61) | 1 [Ref.]                    | 0.024  |
| 12-                                                | 369                                   | (84.05) | 1.07 [1.01- 1.12]           |        |
| ≥13                                                | 372                                   | (82.67) | 1.06 [1.00- 1.10]           |        |
| <b>Nationality</b>                                 |                                       |         |                             |        |
| Kuwaiti                                            | 900                                   | (83.26) | 1 [Ref.]                    | <0.001 |
| Non-Kuwait                                         | 250                                   | (74.63) | 0.90 [0.82-0.96]            |        |
| <b>Governorate<sup>1</sup></b>                     |                                       |         |                             |        |
| Capital                                            | 127                                   | (81.41) | 1 [Ref.]                    | 0.003  |
| Hawally                                            | 188                                   | (76.42) | 0.94 [0.82-1.03]            |        |
| Farawanya                                          | 183                                   | (77.54) | 0.95 [0.83-1.04]            |        |
| Jahra                                              | 214                                   | (89.54) | 1.10 [1.02-1.15]            |        |
| Mubarak al-Kabeer                                  | 124                                   | (83.78) | 1.03 [0.91-1.10]            |        |
| Ahmadi                                             | 296                                   | (79.78) | 0.98 [0.88-1.06]            |        |
| <b>Father's Education<sup>2</sup></b>              |                                       |         |                             |        |
| Primary/Intermediate/no formal education           | 205                                   | (86.86) | 1 [Ref.]                    | <0.001 |
| Secondary (high school)                            | 297                                   | (86.34) | 0.99 [0.87-1.08]            |        |
| Diploma                                            | 220                                   | (84.29) | 0.95 [0.82-1.06]            |        |
| University & above                                 | 399                                   | (73.62) | 0.78 [0.65-0.90]            |        |
| <b>Mother's Education<sup>3</sup></b>              |                                       |         |                             |        |
| Primary/Intermediate/no formal education           | 153                                   | (83.61) | 1 [Ref.]                    | <0.001 |
| Secondary (high school)                            | 263                                   | (86.51) | 1.04 [0.94-1.12]            |        |
| Diploma                                            | 259                                   | (85.20) | 1.02 [0.91-1.10]            |        |
| University & above                                 | 457                                   | (75.54) | 0.88 [0.76-0.99]            |        |
| <b>Total number of brother/sisters<sup>4</sup></b> |                                       |         |                             |        |
| Zero-two                                           | 223                                   | (74.83) | 1 [Ref.]                    | 0.002  |
| Three-four                                         | 434                                   | (80.67) | 1.05 [1.00-1.10]            |        |
| Five or more                                       | 469                                   | (84.81) | 1.10 [1.04-1.13]            |        |
| <b>Passive smoking at household<sup>5</sup></b>    |                                       |         |                             |        |
| No                                                 | 704                                   | (78.14) | 1 [Ref.]                    | <0.001 |
| Yes                                                | 426                                   | (87.12) | 1.11 [1.06-1.15]            |        |



|                                                               |               |      |             |        |
|---------------------------------------------------------------|---------------|------|-------------|--------|
| <b>Times per week consumed breakfast not prepared at home</b> |               |      |             |        |
| Zero                                                          | 484 (77.56)   | 1    | [Ref.]      | 0.019  |
| One-two times                                                 | 478 (84.01)   | 1.08 | [1.02-1.12] |        |
| Three-four                                                    | 98 (83.76)    | 1.07 | [0.97-1.14] |        |
| Five or more                                                  | 67 (85.90)    | 1.10 | [1.00-1.17] |        |
| <b>Times per week consumed dinner not prepared at home</b>    |               |      |             |        |
| Zero                                                          | 114 (72.61)   | 1    | [Ref.]      | 0.018  |
| One-two times                                                 | 719 (81.89)   | 1.09 | [1.03-1.14] |        |
| Three-four                                                    | 211 (82.10)   | 1.09 | [1.01-1.15] |        |
| Five or more                                                  | 75 (87.21)    | 1.14 | [1.04-1.19] |        |
| <b>Consumption of sugary drinks per week</b>                  |               |      |             |        |
| None                                                          | 123 (71.93)   | 1    | [Ref.]      | 0.002  |
| Once-Three times                                              | 633 (81.99)   | 1.09 | [1.04-1.14] |        |
| Four-Six                                                      | 135 (78.95)   | 1.07 | [0.98-1.13] |        |
| Seven/more                                                    | 256 (85.62)   | 1.12 | [1.07-1.17] |        |
| <b>Currently taking supplements<sup>5</sup></b>               |               |      |             |        |
| No                                                            | 1,045 (83.20) | 1    | [Ref.]      | <0.001 |
| Yes                                                           | 103 (65.19)   | 0.78 | [0.68-0.88] |        |
| <b>Number of times walking to school per week<sup>5</sup></b> |               |      |             |        |
| None                                                          | 982 (84.80)   | 1    | [Ref.]      | <0.001 |
| 1-8 times                                                     | 99 (63.87)    | 0.74 | [0.63-0.83] |        |
| Every day                                                     | 69 (66.99)    | 0.77 | [0.65-0.89] |        |
| <b>Time walking to school<sup>5</sup></b>                     |               |      |             |        |
| None                                                          | 982 (84.80)   | 1    | [Ref.]      | <0.001 |
| ≤5 minutes                                                    | 50 (62.50)    | 0.71 | [0.56-0.84] |        |
| 6- 10 minutes                                                 | 53 (69.74)    | 0.80 | [0.65-0.93] |        |
| 11-15                                                         | 38 (67.86)    | 0.77 | [0.60-0.92] |        |
| 16 minutes or more                                            | 26 (57.78)    | 0.65 | [0.46-0.82] |        |
| <b>Time spent on physical activity per week</b>               |               |      |             |        |
| Low                                                           | 396 (84.43)   | 1    | [Ref.]      | 0.005  |
| Medium                                                        | 391 (82.66)   | 0.97 | [0.89-1.04] |        |
| High                                                          | 363 (76.58)   | 0.89 | [0.80-0.96] |        |
| <b>Body Mass Index Categories<sup>6</sup></b>                 |               |      |             |        |
| Normal weight                                                 | 465 (77.37)   | 1    | [Ref.]      | 0.001  |
| Overweight                                                    | 270 (84.38)   | 1.07 | [1.02-1.11] |        |
| Obese                                                         | 400 (84.93)   | 1.08 | [1.03-1.11] |        |
| Under weight                                                  | 15 (62.50)    | 0.84 | [0.59-1.02] |        |

---

**Time outside per day 10:00 am- 4:00 pm  
week days**

|                             |             |                  |        |
|-----------------------------|-------------|------------------|--------|
| Less than 30 minutes        | 563 (85.69) | 1 [Ref.]         | <0.001 |
| 31 minutes to 1 hour        | 342 (76.00) | 0.87 [0.80-0.94] |        |
| More than 1 hour to 2 hours | 178 (80.18) | 0.93 [0.84-1.00] |        |
| More than 2 hours           | 67 (77.01)  | 0.88 [0.74-0.99] |        |

**Time outside per day 10:00 am- 4:00 pm  
week ends**

|                              |             |                  |       |
|------------------------------|-------------|------------------|-------|
| Less than 30 minutes         | 425 (86.03) | 1 [Ref.]         | 0.003 |
| 31 minutes to 1 hour         | 257 (82.37) | 0.94 [0.85-1.02] |       |
| More than 1 hour to 2 hours  | 198 (77.65) | 0.87 [0.76-0.96] |       |
| More than 2 hours to 3 hours | 142 (76.76) | 0.85 [0.74-0.96] |       |
| More than 3 hours            | 127 (75.15) | 0.83 [0.71-0.94] |       |

**Wearing sunscreen**

|              |             |                  |       |
|--------------|-------------|------------------|-------|
| Never        | 874 (79.45) | 1 [Ref.]         | 0.013 |
| Rarely       | 65 (84.42)  | 1.06 [0.94-1.13] |       |
| Sometimes    | 140 (87.50) | 1.09 [1.02-1.14] |       |
| Often/always | 71 (89.87)  | 1.12 [1.02-1.18] |       |

**Staying in shade or under an umbrella**

|           |             |                  |      |
|-----------|-------------|------------------|------|
| Never     | 396 (80.32) | 1 [Ref.]         | 0.04 |
| Rarely    | 70 (72.16)  | 0.90 [0.78-1.01] |      |
| Sometimes | 301 (82.92) | 1.03 [0.96-1.08] |      |
| Often     | 162 (79.02) | 0.98 [0.90-1.05] |      |
| Always    | 220 (85.60) | 1.06 [0.99-1.11] |      |

---

<sup>1</sup>Missing for 20 participants; <sup>2</sup> Missing for 33 participants; <sup>3</sup> Missing for 20 participants; <sup>4</sup>Missing for 27 participants; <sup>5</sup> Missing for 2 participants; <sup>6</sup>Missing for 26 participants; <sup>7</sup> according to WHO growth charts.

Only

**STROBE 2007 (v4) checklist of items to be included in reports of observational studies in epidemiology\***  
**Checklist for cohort, case-control, and cross-sectional studies (combined)**

| Section/Topic             | Item # | Recommendation                                                                                                                                                                                                                                                                                                                                                                                                                                                         | Reported on page #          |
|---------------------------|--------|------------------------------------------------------------------------------------------------------------------------------------------------------------------------------------------------------------------------------------------------------------------------------------------------------------------------------------------------------------------------------------------------------------------------------------------------------------------------|-----------------------------|
| Title and abstract        | 1      | (a) Indicate the study's design with a commonly used term in the title or the abstract                                                                                                                                                                                                                                                                                                                                                                                 | Page 1                      |
|                           |        | (b) Provide in the abstract an informative and balanced summary of what was done and what was found                                                                                                                                                                                                                                                                                                                                                                    | Page 3                      |
| <b>Introduction</b>       |        |                                                                                                                                                                                                                                                                                                                                                                                                                                                                        |                             |
| Background/rationale      | 2      | Explain the scientific background and rationale for the investigation being reported                                                                                                                                                                                                                                                                                                                                                                                   | Page 5                      |
| Objectives                | 3      | State specific objectives, including any pre-specified hypotheses                                                                                                                                                                                                                                                                                                                                                                                                      | Page 5                      |
| <b>Methods</b>            |        |                                                                                                                                                                                                                                                                                                                                                                                                                                                                        |                             |
| Study design              | 4      | Present key elements of study design early in the paper                                                                                                                                                                                                                                                                                                                                                                                                                | Page 6                      |
| Setting                   | 5      | Describe the setting, locations, and relevant dates, including periods of recruitment, exposure, follow-up, and data collection                                                                                                                                                                                                                                                                                                                                        | Page 6- Page 8 and Page 14  |
| Participants              | 6      | (a) <i>Cohort study</i> —Give the eligibility criteria, and the sources and methods of selection of participants. Describe methods of follow-up<br><i>Case-control study</i> —Give the eligibility criteria, and the sources and methods of case ascertainment and control selection. Give the rationale for the choice of cases and controls<br><i>Cross-sectional study</i> —Give the eligibility criteria, and the sources and methods of selection of participants | Page 6                      |
|                           |        | (b) <i>Cohort study</i> —For matched studies, give matching criteria and number of exposed and unexposed<br><i>Case-control study</i> —For matched studies, give matching criteria and the number of controls per case                                                                                                                                                                                                                                                 |                             |
| Variables                 | 7      | Clearly define all outcomes, exposures, predictors, potential confounders, and effect modifiers. Give diagnostic criteria, if applicable                                                                                                                                                                                                                                                                                                                               | Page 6 and Page 7           |
| Data sources/ measurement | 8*     | For each variable of interest, give sources of data and details of methods of assessment (measurement). Describe comparability of assessment methods if there is more than one group                                                                                                                                                                                                                                                                                   | Page 6 and Page 7           |
| Bias                      | 9      | Describe any efforts to address potential sources of bias                                                                                                                                                                                                                                                                                                                                                                                                              | Page 6, Page 12 and Page 17 |
| Study size                | 10     | Explain how the study size was arrived at                                                                                                                                                                                                                                                                                                                                                                                                                              | Page 13                     |
| Quantitative variables    | 11     | Explain how quantitative variables were handled in the analyses. If applicable, describe which groupings were chosen and why                                                                                                                                                                                                                                                                                                                                           | Page 7 and Page 8           |
| Statistical methods       | 12     | (a) Describe all statistical methods, including those used to control for confounding                                                                                                                                                                                                                                                                                                                                                                                  | Page 7 and Page 8           |
|                           |        | (b) Describe any methods used to examine subgroups and interactions                                                                                                                                                                                                                                                                                                                                                                                                    | Page 7 and Page 8           |
|                           |        | (c) Explain how missing data were addressed                                                                                                                                                                                                                                                                                                                                                                                                                            | These were minimum.         |

|                          |     |                                                                                                                                                                                                                                                                                                           |                                                |
|--------------------------|-----|-----------------------------------------------------------------------------------------------------------------------------------------------------------------------------------------------------------------------------------------------------------------------------------------------------------|------------------------------------------------|
|                          |     | (d) <i>Cohort study</i> —If applicable, explain how loss to follow-up was addressed<br><i>Case-control study</i> —If applicable, explain how matching of cases and controls was addressed<br><i>Cross-sectional study</i> —If applicable, describe analytical methods taking account of sampling strategy | Page 8                                         |
|                          |     | (e) Describe any sensitivity analyses                                                                                                                                                                                                                                                                     |                                                |
| <b>Results</b>           |     |                                                                                                                                                                                                                                                                                                           |                                                |
| Participants             | 13* | (a) Report numbers of individuals at each stage of study—eg numbers potentially eligible, examined for eligibility, confirmed eligible, included in the study, completing follow-up, and analysed                                                                                                         | Page 8                                         |
|                          |     | (b) Give reasons for non-participation at each stage                                                                                                                                                                                                                                                      | Page 8                                         |
|                          |     | (c) Consider use of a flow diagram                                                                                                                                                                                                                                                                        |                                                |
| Descriptive data         | 14* | (a) Give characteristics of study participants (eg demographic, clinical, social) and information on exposures and potential confounders                                                                                                                                                                  | Table 1 page 9                                 |
|                          |     | (b) Indicate number of participants with missing data for each variable of interest                                                                                                                                                                                                                       | Table 1 , Table 2 and also supplementary table |
|                          |     | (c) <i>Cohort study</i> —Summarise follow-up time (eg, average and total amount)                                                                                                                                                                                                                          |                                                |
| Outcome data             | 15* | <i>Cohort study</i> —Report numbers of outcome events or summary measures over time                                                                                                                                                                                                                       |                                                |
|                          |     | <i>Case-control study</i> —Report numbers in each exposure category, or summary measures of exposure                                                                                                                                                                                                      |                                                |
|                          |     | <i>Cross-sectional study</i> —Report numbers of outcome events or summary measures                                                                                                                                                                                                                        | Page 10                                        |
| Main results             | 16  | (a) Give unadjusted estimates and, if applicable, confounder-adjusted estimates and their precision (eg, 95% confidence interval). Make clear which confounders were adjusted for and why they were included                                                                                              |                                                |
|                          |     | (b) Report category boundaries when continuous variables were categorized                                                                                                                                                                                                                                 | All tables                                     |
|                          |     | (c) If relevant, consider translating estimates of relative risk into absolute risk for a meaningful time period                                                                                                                                                                                          |                                                |
| Other analyses           | 17  | Report other analyses done—eg analyses of subgroups and interactions, and sensitivity analyses                                                                                                                                                                                                            | Page 12                                        |
| <b>Discussion</b>        |     |                                                                                                                                                                                                                                                                                                           |                                                |
| Key results              | 18  | Summarise key results with reference to study objectives                                                                                                                                                                                                                                                  | Page 13                                        |
| Limitations              | 19  | Discuss limitations of the study, taking into account sources of potential bias or imprecision. Discuss both direction and magnitude of any potential bias                                                                                                                                                | Page 16                                        |
| Interpretation           | 20  | Give a cautious overall interpretation of results considering objectives, limitations, multiplicity of analyses, results from similar studies, and other relevant evidence                                                                                                                                | Page 17                                        |
| Generalisability         | 21  | Discuss the generalisability (external validity) of the study results                                                                                                                                                                                                                                     | Page 17                                        |
| <b>Other information</b> |     |                                                                                                                                                                                                                                                                                                           |                                                |
| Funding                  | 22  | Give the source of funding and the role of the funders for the present study and, if applicable, for the original study on which the present article is based                                                                                                                                             | Page 18                                        |

1  
2  
3  
4 \*Give information separately for cases and controls in case-control studies and, if applicable, for exposed and unexposed groups in cohort and cross-sectional studies.

5 **Note:** An Explanation and Elaboration article discusses each checklist item and gives methodological background and published examples of transparent reporting. The STROBE  
6 checklist is best used in conjunction with this article (freely available on the Web sites of PLoS Medicine at <http://www.plosmedicine.org/>, Annals of Internal Medicine at  
7 <http://www.annals.org/>, and Epidemiology at <http://www.epidem.com/>). Information on the STROBE Initiative is available at [www.strobe-statement.org](http://www.strobe-statement.org).

8  
9  
10  
11  
12  
13  
14  
15  
16  
17  
18  
19  
20  
21  
22  
23  
24  
25  
26  
27  
28  
29  
30  
31  
32  
33  
34  
35  
36  
37  
38  
39  
40  
41  
42  
43  
44  
45  
46  
47

For peer review only

# BMJ Open

## Vitamin D Status among Adolescents in Kuwait: A Cross-sectional Study.

|                                 |                                                                                                                                                                                                                                                                                                                                                                                                                                                                                                                                                                   |
|---------------------------------|-------------------------------------------------------------------------------------------------------------------------------------------------------------------------------------------------------------------------------------------------------------------------------------------------------------------------------------------------------------------------------------------------------------------------------------------------------------------------------------------------------------------------------------------------------------------|
| Journal:                        | <i>BMJ Open</i>                                                                                                                                                                                                                                                                                                                                                                                                                                                                                                                                                   |
| Manuscript ID                   | bmjopen-2017-021401.R2                                                                                                                                                                                                                                                                                                                                                                                                                                                                                                                                            |
| Article Type:                   | Research                                                                                                                                                                                                                                                                                                                                                                                                                                                                                                                                                          |
| Date Submitted by the Author:   | 01-May-2018                                                                                                                                                                                                                                                                                                                                                                                                                                                                                                                                                       |
| Complete List of Authors:       | Al-Taiar, Abdullah; Faculty of Medicine, Kuwait University, Department of Community Medicine and Behavioural Sciences<br>Rahman , Abdur ; College of Life Sciences, Kuwait University, Department of Food Science and Nutrition<br>Al-Sabah, Reem; Faculty of Medicine, Kuwait University, Department of Community Medicine and Behavioural Sciences<br>Shaban, Lemia ; College of Life Sciences, Kuwait University, Department of Food Science and Nutrition<br>Al-Harbi, Anwar ; Kuwait Institute for Scientific Research , Department of Science and Nutrition |
| <b>Primary Subject Heading</b>: | Nutrition and metabolism                                                                                                                                                                                                                                                                                                                                                                                                                                                                                                                                          |
| Secondary Subject Heading:      | Epidemiology, Global health, Paediatrics, Public health                                                                                                                                                                                                                                                                                                                                                                                                                                                                                                           |
| Keywords:                       | PUBLIC HEALTH, Vitamin D, Adolescents, school children, Kuwait                                                                                                                                                                                                                                                                                                                                                                                                                                                                                                    |
|                                 |                                                                                                                                                                                                                                                                                                                                                                                                                                                                                                                                                                   |

SCHOLARONE™  
Manuscripts

only

## Vitamin D Status among Adolescents in Kuwait: A Cross-sectional Study.

Abdullah Al-Taiar<sup>1</sup>, Abdur Rahman<sup>2</sup>, Reem Al-Sabah<sup>1</sup>, Lemia Shaban<sup>2</sup>, Anwar Al-Harbi<sup>3</sup>

<sup>1</sup> Department of Community Medicine and Behavioural Sciences

Faculty of Medicine, Kuwait University,

Box: 24923 Safat-13110 Kuwait.

<sup>2</sup> Department of Food Science and Nutrition

College of Life Sciences, Kuwait University,

Box 5969, Safat-13060, Kuwait.

<sup>3</sup> Kuwait Institute for Scientific Research,

Department of Science and Nutrition,

Box: 24885 Safat-13109, Kuwait.

### **Before publication corresponding author:**

Dr Abdullah Al-Taiar

Associate Professor of Epidemiology

Department Community Medicine and Behavioural Sciences,

Faculty of Medicine, Kuwait University,

Box: 24923 Safat-13110 Kuwait.

Tel: +965-24986553

Fax: +965-5338948

E-mail: [altaiar@hsc.edu.kw](mailto:altaiar@hsc.edu.kw)

1  
2  
3 **After publication corresponding author:**  
4

5 Abdur Rahman  
6

7 Associate Professor  
8

9 Department of Food Science and Nutrition,  
10

11 College of Life Sciences, Kuwait University,  
12

13 Box: 5969 Safat-13060 Kuwait.  
14

15 Tel: +965-249633055  
16

17 Fax: +965-22513929  
18

19 E-mail: [abdurrahman.ahmad@ku.edu.kw](mailto:abdurrahman.ahmad@ku.edu.kw)  
20  
21  
22  
23  
24  
25  
26  
27  
28  
29  
30  
31  
32  
33  
34  
35  
36  
37  
38  
39  
40  
41  
42  
43  
44  
45  
46  
47  
48  
49  
50  
51  
52  
53  
54  
55  
56  
57  
58  
59  
60



## Abstract

### Objectives

In Kuwait, as in many Arab states in the gulf region, there are limited data on the prevalence of vitamin D deficiency among healthy adolescents. This study aimed to estimate the prevalence of vitamin D deficiency in a nationally representative sample of adolescents and investigate factors associated with vitamin D status.

### Methods

A cross-sectional study was conducted on 1416 adolescents aged 11-16 years, who were randomly selected from middle schools in all governorates of Kuwait. Data were collected from parents through self-administered questionnaire and from adolescents through face-to-face interview. Vitamin D was measured using liquid chromatography-tandem mass spectrometry (LC-MS/MS). Logistic regression was used to investigate the independent factors associated with vitamin D status.

### Results

The Prevalence of vitamin D deficiency was 1,150 (81.21%, 95%CI: 71.61-90.81%) while severe deficiency was 559 (39.48%). Only 51 (3.60%) were vitamin D sufficient. Prevalence of vitamin D deficiency was significantly higher among females compared to males (91.69% vs. 70.32%;  $p<0.001$ ). There was a significant inverse correlation between vitamin D and PTH (Spearman correlation=-0.35;  $p<0.001$ ). In the final model, gender, age, governorate, parental education, body mass index, vitamin D supplement and number of times walking to school per week were all significantly related to vitamin D deficiency.

### Conclusion

High prevalence of vitamin D deficiency was noted among adolescents in Kuwait despite the abundant sunshine which may reflect strong sun avoidance behavior. Adequate outdoor daytime activities should be encouraged especially for females. We call for locally tailored guidelines for vitamin D supplement in which females should have a higher dose compared to males.

**Keywords:** Vitamin D, adolescents, Kuwait, Middle East, school children

### Strengths and limitations of this study

- This is the first study that aimed to estimate the prevalence of vitamin D on a large nationally representative sample of adolescents in Kuwait.
- We measured vitamin D using the recommended laboratory methodology and gathered data from both parents and adolescents.
- We did not measure the skin color, which can be an important determinant for vitamin D synthesis in the skin.

## Introduction

An optimal vitamin D status is extremely important during adolescence for proper growth and bone mineral accrual [1]. In addition to its critical role in bone health, several studies have linked vitamin D deficiency with various disease conditions during adolescence or adulthood such as asthma and allergies [2], type 2 diabetes [3], depression[4], cancer and even all-cause mortality [5]. However, the results of randomized control trials, which tested the impact of vitamin D supplement on the risk of these disease conditions, remain inconclusive.

Several studies have evaluated the prevalence of vitamin D deficiency and insufficiency during adolescence reporting high prevalence of vitamin D deficiency worldwide [6 7]. This was the case even in countries with abundant sunshine, which is the main factor for endogenous vitamin D synthesis. For example, in India the prevalence of vitamin D deficiency among adolescents was reported to be 85-98% [8 9] while in Saudi Arabia it was found to be around 96% [10]. In Arab states in the Gulf region or the broader Middle East, there is paucity of data on vitamin D status in pediatric and adolescents populations. The few studies that showed a high prevalence of vitamin D deficiency in adolescents suffered from major methodological weaknesses [10-12]. They were either small hospital-based, lacked proper sampling technique or used less optimal laboratory method to measure vitamin D. It is also known that factors which influence vitamin D status such as avoiding sun exposure, skin pigmentation, high body mass index (BMI) and dietary factors, particularly the lack of vitamin D supplement and intake of vitamin D rich foods [13] are all on rise in Arab states in the Gulf region. The aim of the present study was therefore to assess vitamin D status among adolescents living in Kuwait, a country with a plenty of sun shine, and to investigate factors associated with low vitamin D level.

## Methods

### Study population and study participants

Kuwait is a small country at latitude (29.3759° N) with a population of 4.2 million. Approximately, 25% of population is under the age of 19-year. The study population comprised students in the age between 11 and 16 years in the public middle schools from all governorates of Kuwait. A school based cross-sectional study was conducted on students from 12 public middle schools that were selected using a stratified multistage cluster random sampling with a probability proportional to size. The sample allocation in each governorate was based on the relative size of that governorate as judged by the total number of students in the governorate. Students with major chronic disease conditions are registered in each school and these were excluded from the study. However, students with minor illnesses or self-reported illness were included in the study. The type of illness was recorded during data collection and included in the analysis. The study was funded by Kuwait University and approved by The Ethics Committee at The Ministry of Health in Kuwait as well as The Ethics Committee at Health Sciences Centre, Kuwait University.

### Data Collection

An informed consent was sent to the parents along with a self-administered questionnaire on parents' level of education (No formal education, primary/intermediate, high school, diploma, university and above), income, type of housing, number of siblings of the index child, passive smoking at household and the number of times per week the index child had a meal prepared outside home during the last three months. After obtaining written informed consent from the parents and verbal consent from the school children, trained dedicated personnel carried out face-to-face interviews with the students using a structured questionnaire. The questionnaire was carefully developed after extensive review of the literature and was pilot tested on 20 students who were not included in the study. It comprised questions on habitual sun exposure during the last three months, which was assessed by the core questions developed to measure

1  
2  
3 the exposure to sunlight in adolescents as described by Glanz et al. [14]; in addition to smoking habits,  
4 physical activity and dietary intake. Data on physical activity were collected using a questionnaire that was  
5 developed based on the Youth Physical Activity Questionnaire in UK [15] and The Arab teens lifestyle study  
6 [16]. The questionnaire was validated among high school students and showed strong correlation with data  
7 collected by accelerometers (Spearman correlation= 0.92;  $p < 0.001$  for total steps count) (not published).  
8  
9 Data on dietary intake of vitamin D were collected from only 200 students using food frequency  
10 questionnaire for calcium and vitamin D intake in adolescents [17], which has been validated in our setting  
11 [18]. Food models or serving containers were used to assist in estimating serving size. Measurements of  
12 standing height and body weight of the study subjects were assessed using a digital weight and height scale  
13 (Detecto®) in a standardized manner.  
14  
15  
16  
17  
18  
19  
20  
21  
22  
23  
24

### 25 **Laboratory methods**

26  
27 Five ml of venous blood was collected in gel-containing tubes (SST II advance, BD vacutainer) from each  
28 participant by a trained nurse; and the samples were protected from light. On the same day, the samples  
29 were centrifuged at 2000 x g for 15 minutes and the serum was transferred to Eppendorf tubes and stored  
30 at -80°C until analysis. Serum 25-hydroxyvitamin D (25-OH-D) concentration is the best marker of vitamin D  
31 status because it is the major circulating form of vitamin D, reflecting both the amount produced in the skin  
32 after sun exposure and the amount consumed in foods [19]. It was measured in College of American  
33 Pathologists CAP-accredited laboratory by liquid chromatography-tandem mass spectrometry (LC-MS/MS),  
34 which is the recommended method for vitamin D assessment in epidemiological studies [20]. According to  
35 the Endocrine Society [21] and the Society for Adolescent Health and Medicine [22], we used the following  
36 cut-off of 25-OH-D to define vitamin D status: vitamin D deficiency  $< 50$  nmol/L (20 ng/mL); vitamin D  
37 insufficiency 50-75 nmol/L (20-30 ng/mL); and vitamin D sufficiency  $\geq 75$  nmol/L (30 ng/mL). Thus,  
38 hypovitaminosis D was defined in the presence of 25-OH-D levels  $< 75.0$  nmol/L (30 ng/mL). Furthermore,  
39 severe vitamin D deficiency was defined as 25-OH-D levels  $< 25.0$  nmol/L (10 ng/mL) [23]. Serum intact  
40  
41  
42  
43  
44  
45  
46  
47  
48  
49  
50  
51  
52  
53  
54  
55  
56  
57  
58  
59  
60

1  
2  
3 Parathyroid hormone (PTH) was measured using the Access Intact PTH chemiluminescent immunoassay  
4 with the Unicel Dxl 800 Beckman Coulter analyzer using commercial kit (Cat. # A16972). Similar to other  
5 studies, PTH level  $\geq 65.0$  ng/L was suggestive of hyperparathyroidism [24] although there is no consensus  
6 on this cut-off point.  
7  
8  
9  
10

### 11 12 13 **Patient and Public Involvement**

14 Public were not directly involved in the design of this study. However, schools were involved in approaching  
15 the parents to obtain their consents. We also sent the results of the laboratory tests of each participant to  
16 the parents through schools using closed envelopes to ensure confidentiality.  
17  
18  
19  
20  
21  
22

### 23 **Data analysis**

24 Data were double entered into specifically designed database using Epidata Entry. Data analysis was  
25 conducted using Stata (StataCorp. 2011. Release 12). BMI was calculated as weight (Kg) divided by height  
26 squared ( $m^2$ ). Weight status was categorized into normal, overweight and obese according to WHO growth  
27 charts. Chi-squared test was used to test differences in categorical variables. Because vitamin D deficiency  
28 was a common outcome and the log-binomial model failed to converge, a modified version of multiple  
29 logistic regression that calculates prevalence ratio was used to study the association between each  
30 presumed risk factor and vitamin D deficiency (25-OH-D  $< 50$  nmol/L). Variables that were found to be  
31 statistically significant at 15% level of significance were considered in multivariate analysis. Variables were  
32 divided into groups (e.g. socio-demographic, sun exposure, etc) and were added sequentially to the model.  
33 Statistical significance of variables was evaluated by likelihood ratio test which compares the model with  
34 and without the variable. Goodness of fit of the final model was evaluated by Hosmer-Lemeshow test.  
35 Factors with  $p < 0.05$  were deemed to be statistically significant. The analysis above was repeated using  
36 hypovitaminosis (25-OH-D levels  $< 75.0$  nmol/L) as the binary outcome. We also conducted multiple linear  
37 regression analysis using vitamin D level as a continuous outcome (after log-transformation) and reported  
38  
39  
40  
41  
42  
43  
44  
45  
46  
47  
48  
49  
50  
51  
52  
53  
54  
55

the results in the text. Because of the complex structure of this survey data, we used survey method, which gives more precise estimates of standard error.

## Results

Of 1583 parents approached, 161 refused to participate (because children, parents or both refused).

Another 6 samples were not sufficient to conduct blood analysis, thus the analysis below comprised 1416 students. Table (1) shows the socio-demographic characteristics of the study group. The mean (SD) age was 12.48 (0.94) years and 694 (49.01%) were males.

Table (1). Socio-demographic characteristics and vitamin D level among adolescents in public middle schools in Kuwait.

| Characteristics                                  | Males            | Females          | Total            |
|--------------------------------------------------|------------------|------------------|------------------|
|                                                  | n=694            | n=722            | N=1416           |
| <b>Age in years, Mean (SD) years</b>             | 12.56 (0.94)     | 12.41 (0.92)     | 12.48 0.94       |
| <b>25-OH-D nmol/L, Median (IQR)</b>              | 39.8 (29.4-52.7) | 21.5 (14.7-30.7) | 29.7 (19.2-44.2) |
|                                                  | <b>n (%)</b>     | <b>n (%)</b>     | <b>n (%)</b>     |
| <b>Nationality (N= 1416)</b>                     |                  |                  |                  |
| Kuwaiti                                          | 423 (60.95)      | 658 (91.14)      | 1,081 (76.34)    |
| Non-Kuwait                                       | 271 (39.05)      | 64 (8.86)        | 335 (23.66)      |
| <b>Father's Education (N=1383)</b>               |                  |                  |                  |
| No formal education                              | 9 (1.33)         | 6 (0.85)         | 15 (1.08)        |
| Primary/Intermediate                             | 95 (14.05)       | 126 (17.82)      | 221 (15.98)      |
| Secondary (high school)                          | 157 (23.22)      | 187 (26.45)      | 344 (24.87)      |
| Diploma                                          | 126 (18.64)      | 135 (19.09)      | 261 (18.87)      |
| University & above                               | 289 (42.75)      | 253 (35.79)      | 542 (39.19)      |
| <b>Mother's Education (N=1396)</b>               |                  |                  |                  |
| No formal education                              | 18 (2.64)        | 13 (1.82)        | 31 (2.22)        |
| Primary/Intermediate                             | 79 (11.60)       | 73 (10.21)       | 152 (10.89)      |
| Secondary (high school)                          | 140 (20.56)      | 164 (22.94)      | 304 (21.78)      |
| Diploma                                          | 136 (19.97)      | 168 (23.50)      | 304 (21.78)      |
| University & above                               | 308 (45.23)      | 297 (41.54)      | 605 (43.34)      |
| <b>Father's Income (Kuwaiti Dinars) (N=1370)</b> |                  |                  |                  |
| Less than 500                                    | 64 (9.61)        | 27 (3.84)        | 91 (6.64)        |
| 500 to 1000                                      | 168 (25.23)      | 136 (19.32)      | 304 (22.19)      |
| 1001 to 1500                                     | 175 (26.28)      | 246 (34.94)      | 421 (30.73)      |

|                                   |             |             |             |
|-----------------------------------|-------------|-------------|-------------|
| 1501 to 2000                      | 100 (15.02) | 119 (16.90) | 219 (15.99) |
| More than 2000                    | 83 (12.46)  | 90 (12.78)  | 173 (12.63) |
| Do not wish to tell               | 76 (11.41)  | 86 (12.22)  | 162 (11.82) |
| <b>Mother's Employment Status</b> |             |             |             |
| (N=1388)                          |             |             |             |
| Housewife                         | 267 (39.38) | 221 (31.13) | 488 (35.16) |
| Paid employment                   | 307 (45.28) | 373 (52.54) | 680 (48.99) |
| Others                            | 104 (15.34) | 116 (16.34) | 220 (15.85) |
| <b>Housing (N=1397)</b>           |             |             |             |
| Rented flat                       | 301 (44.20) | 209 (29.19) | 510 (36.51) |
| Rented house                      | 94 (13.80)  | 69 (9.64)   | 163 (11.67) |
| Owned flat                        | 17 (2.50)   | 42 (5.87)   | 59 (4.22)   |
| Owned house                       | 269 (39.50) | 396 (55.31) | 665 (47.60) |

IQR: Interquartile Range. All %s are column percentages.



### Prevalence of vitamin D deficiency

The median (Interquartile Range, IQR) of 25-OH-D was 29.7 (19.2- 44.2) nmol/L. Prevalence of vitamin D deficiency was 1,150 (81.21%, 95%CI: 71.61-90.81%) while severe deficiency was 559 (39.48%). Only 51 (3.60%) participants were vitamin D sufficient. Prevalence of vitamin D deficiency was significantly higher among females compared to males (91.69% vs. 70.32%;  $p < 0.001$ ). Also, the median (IQR) of vitamin D was 39.8 (29.4- 52.7) nmol/L and 21.5 (14.7- 30.7) nmol/L among males and females, respectively ( $p < 0.001$ ).

There was no difference in the prevalence of vitamin D deficiency between Kuwaitis and non-Kuwaitis after stratification by gender. There was significant inverse correlation between vitamin D and PTH (Spearman correlation = -0.35;  $p < 0.001$ ). In relation to vitamin D status, elevated PTH (secondary hyperparathyroidism PTH  $\geq 65$  ng/L. i.e. 6.89 pmol/L) was detected in 312 (55.81%), 185 (31.30%) and 59 (27.57%) of adolescents with vitamin D severe deficiency, deficiency and insufficiency, respectively. If we used the reference range of the laboratory where the samples were tested (PTH: 1.3-9.3 pmol/L), the prevalence of secondary hyperparathyroidism would be 182 (32.56%), 73 (12.35%), and 25 (11.68%) among adolescents with vitamin D severe deficiency, deficiency and insufficiency, respectively. The median [IQR] PTH was significantly different dependent on vitamin D status (severe deficiency 7.37 [5.44-10.55] pmol/L; deficiency 5.63 [4.13-7.40] pmol/L; insufficiency 5.14 [3.87-6.99] pmol/L; sufficiency 4.31 [3.75- 5.73] pmol/L;  $p < 0.001$ ). The actual relationship between 25-OH-D and PTH levels is shown in figure (1).

Table (2): Factors associated with vitamin D deficiency among adolescence in multivariate analysis.

| Characteristics   | Total | Prevalence of vitamin D deficiency<br>n (%) | Prevalence Ratio<br>[95%CI] | P      |
|-------------------|-------|---------------------------------------------|-----------------------------|--------|
| <b>Gender</b>     |       |                                             |                             |        |
| Male              | 694   | 488 (70.32)                                 | 1 [Ref.]                    | <0.001 |
| Female            | 722   | 662 (91.69)                                 | 1.20 [1.17- 1.21]           |        |
| <b>Age (year)</b> |       |                                             |                             |        |
| <12               | 527   | 409 (77.61)                                 | 1 [Ref.]                    | 0.003  |
| 12-               | 439   | 369 (84.05)                                 | 1.10 [1.04- 1.14]           |        |

|                                                   |       |               |      |              |        |
|---------------------------------------------------|-------|---------------|------|--------------|--------|
| ≥13                                               | 450   | 372 (82.67)   | 1.07 | [1.01- 1.12] |        |
| <b>Governorate</b>                                |       |               |      |              |        |
| Capital                                           | 156   | 127 (81.41)   | 1    | [Ref.]       | <0.001 |
| Hawally                                           | 246   | 188 (76.42)   | 0.88 | [0.73-1.01]  |        |
| Farawanya                                         | 236   | 183 (77.54)   | 0.85 | [0.68-0.99]  |        |
| Jahra                                             | 239   | 214 (89.54)   | 1.10 | [0.98-1.17]  |        |
| Mubarak al-Kabeer                                 | 148   | 124 (83.78)   | 1.06 | [0.93-1.14]  |        |
| Ahmadi                                            | 371   | 296 (79.78)   | 1.06 | [0.95-1.13]  |        |
| <b>Father's Education</b>                         |       |               |      |              |        |
| Primary/Intermediate/no formal education          | 236   | 205 (86.86)   | 1    | [Ref.]       | <0.009 |
| Secondary (high school)                           | 344   | 297 (86.34)   | 1.04 | [0.92-1.12]  |        |
| Diploma                                           | 261   | 220 (84.29)   | 1.01 | [0.88-1.10]  |        |
| University & above                                | 542   | 399 (73.62)   | 0.89 | [0.76-1.01]  |        |
| <b>Passive smoking in household</b>               |       |               |      |              |        |
| No                                                | 901   | 704 (78.14)   | 1    | [Ref.]       | <0.006 |
| Yes                                               | 489   | 426 (87.12)   | 1.08 | [1.02-1.13]  |        |
| <b>Currently taking supplements</b>               |       |               |      |              |        |
| No                                                | 1,256 | 1,045 (83.20) | 1    | [Ref.]       | <0.001 |
| Yes                                               | 158   | 103 (65.19)   | 0.63 | [0.49-0.76]  |        |
| <b>Consumption of sugary drinks per week</b>      |       |               |      |              |        |
| None                                              | 171   | 123 (71.93)   | 1    | [Ref.]       | 0.002  |
| Once-Three times                                  | 772   | 633 (81.99)   | 1.11 | [1.05-1.16]  |        |
| Four-Six times                                    | 171   | 135 (78.95)   | 1.07 | [0.96-1.14]  |        |
| Seven/more times                                  | 299   | 256 (85.62)   | 1.15 | [1.08-1.19]  |        |
| <b>Number of times walking to school per week</b> |       |               |      |              |        |
| None                                              | 1,158 | 982 (84.80)   | 1    | [Ref.]       | <0.001 |
| 1-8 times                                         | 155   | 99 (63.87)    | 0.81 | [0.68-0.93]  |        |
| Every day                                         | 103   | 69 (66.99)    | 0.77 | [0.61-0.92]  |        |
| <b>Body Mass Index Categories<sup>1</sup></b>     |       |               |      |              |        |
| Normal weight                                     | 601   | 465 (77.37)   | 1    | [Ref.]       | 0.001  |
| Overweight                                        | 320   | 270 (84.38)   | 1.08 | [1.01-1.13]  |        |
| Obese                                             | 471   | 400 (84.93)   | 1.12 | [1.07-1.16]  |        |
| Underweight                                       | 24    | 15 (62.50)    | 0.93 | [0.67-1.10]  |        |

%s are row percentages. <sup>1</sup>according to WHO growth charts.

### Factors associated with vitamin D status

Factors that showed significant association with vitamin D deficiency (25-OH-D < 50 nmol/L) in univariate analysis were gender, parental education, number of times per week the participants consumed breakfast or dinner prepared outside home, taking supplements, walking to school (instead of using school bus or car) in addition to BMI (Supplementary Table). Similarly, time spent outdoor per day (between 10:00 am and 4:00 pm) during weekdays and weekends in addition to wearing sunscreen and staying in shade or under an umbrella were all significant predictors in univariate analysis.

Table (2) shows the independent predictors for vitamin D deficiency in multivariate analysis. In the final model, gender, age, governorate, parental education, vitamin D supplement, and the number of times participant walks to school per week were all significantly related to vitamin D deficiency. Data from the food frequency questionnaire for calcium and vitamin D intake were available only for 200 study subjects, and of all food items, only eggs were significantly related to vitamin D deficiency in multivariate model (data not shown). We repeated the analysis above using hypovitaminosis (sufficient vs. insufficient/deficient) as a binary outcome. The same factors were found to be significantly related to hypovitaminosis, although mother's education (instead of father's education) was found to be significant in this analysis. We also used linear regression to identify the factors associated with vitamin D level as a continuous variable. Factors that showed significant association with vitamin D level in multivariate analysis were age, gender, governorate, passive smoking at household, number of times per week the participants consumed breakfast prepared outside home in the last three months, time spent outdoor during weekdays, preference to stay in shade or under the umbrella, and BMI categories. With respect to dietary factors, milk and cheese, fast food hamburger and tuna fish were significantly associated with vitamin D level in univariate linear regression. When these food items were introduced to the final model, only milk and tuna fish were significantly associated with vitamin D level. It is worth noting that the best model was able to explain only 45% of the variability in vitamin D level in this analysis.

## Discussion

Although several reports have described vitamin D deficiency among adults in the Arab states in the Gulf region, there are limited data on the prevalence of vitamin D deficiency among healthy adolescents.

We used a nationally representative sample to examine a large number of healthy adolescents, becoming to our knowledge the largest study focusing on this group in Kuwait. We used the recommended method to measure vitamin D level and demonstrated that vitamin D deficiency is too common despite the abundant sunshine. Secondary hyperparathyroidism due to vitamin D deficiency is also common and females had lower vitamin D levels compared to males.

In our setting, approximately, 81% and 15% of adolescents were vitamin D deficient or insufficient, respectively. This is higher than that reported among adolescents in European countries [25-27], Southeastern United States [28 29] or New Zealand [30]. Our finding is more akin to that reported from Saudi Arabia (95.6%) [10], India (85-98%) [8 9], or Korea where only 2.3% of adolescents were found to be vitamin D sufficient [31]. Our findings are also in accordance with the high prevalence reported consistently among adult population in Kuwait [32] or other countries in the Gulf region such as Saudi Arabia [33], Bahrain [34] and Qatar [35].

Similar to other studies among adolescents [24 28 36], our findings showed that a large number of those with low vitamin D level had evidence of secondary hyperparathyroidism. We reported a much higher prevalence of secondary hyperparathyroidism compared to other studies [24 36], which could be due to using lower PTH cut-off point to define secondary hyperthyroidism or using different laboratory method to measure PTH. Hyperparathyroidism, which potentially leads to increased bone resorption, is particularly important during adolescence because it is the critical period to achieve peak bone mass. Serum PTH decreased as 25-OH-D level increased with no clear threshold of serum 25-OH-D at which PTH level

1  
2  
3 plateaued although very few participants had elevated PTH when 25-OH-D level was above 75 nmol/L  
4  
5 (Figure 1). Although we did not measure markers of bone turnover, this provides an additional evidence that  
6  
7 25-OH-D should be maintained above 75 nmol/L, which is the current cut-off point used to define vitamin D  
8  
9 sufficiency in adolescents [21 22]. There were, however, adolescents with low vitamin D concentration  
10  
11 without secondary hyperparathyroidism (Figure 1). This has been noted in other studies [28 36], the clinical  
12  
13 significance of which is unknown in children and deserves further investigation.  
14  
15

16  
17  
18  
19  
20 Because of the abundant sunshine in the Arab states in the Gulf region, there has been a lot of skepticism  
21  
22 of vitamin D deficiency. Informal discussions, even among scientific community, in the region show strong  
23  
24 denial attributing such low levels of vitamin D to poorly executed or faulty laboratory measurements. Our  
25  
26 findings should eliminate doubts on vitamin D deficiency among adolescents in Kuwait and pave the way to  
27  
28 look for practical solutions. Factors that may hinder cutaneous synthesis of vitamin D despite abundant  
29  
30 sunshine may include dust storms (which occur almost in one third of the year in Kuwait [37]), an avoidance  
31  
32 of sun exposure by indoor lifestyle, head/body covering or other cultural practices and the use of  
33  
34 sunscreen. Self-reported exposure to sunlight was a significant predictor for vitamin D deficiency in  
35  
36 univariate analysis but lost statistical significance in multivariate analysis. Most of adolescents in our setting  
37  
38 avoid sunlight as only around 6% of the participants spent more than two hours outdoor per day between  
39  
40 10:00 am and 4:00 pm during weekdays (data not shown). Avoidance of sunlight has been suggested to be  
41  
42 the underlying reason for the counterintuitive seasonal variation that has been reported in the region, where  
43  
44 the prevalence of vitamin D deficiency is higher in the summer compared to the winter season [36]. Owing  
45  
46 to the desert climate, avoiding sun exposure would be stronger during summer due to extremely high  
47  
48 temperature. We collected blood samples in February-April and thus we were unable to describe seasonal  
49  
50 variation in vitamin D status. Exposure to sunlight contributes up to 90–95% of the vitamin D supply, while  
51  
52 the number of foods naturally containing a significant quantity of vitamin D is very limited except for some  
53  
54  
55

1  
2  
3 oily fish that is rarely consumed by adolescents worldwide and in our setting [38] (~5% of adolescents in our  
4 setting consumed salmon once per week or more). As such, education of parents and adolescents on the  
5 safe amount of sun exposure in addition to changes in the school environment to facilitate exposure to  
6 sunlight may produce the highest impact on vitamin D status among adolescents. There is no consensus on  
7 the duration of time, which adolescents can safely be exposed to direct sunlight. However, exposure of legs  
8 and arms for at least 15 minutes twice per week has been reported to be sufficient for adequate sun-  
9 induced cutaneous vitamin D synthesis in adolescents [38].  
10  
11  
12  
13  
14  
15  
16  
17  
18  
19  
20

21 Similar to several studies that investigated vitamin D deficiency among adolescents, females had a  
22 significantly higher prevalence of vitamin D deficiency compared to males even after adjusting for all  
23 potential confounders. Also, vitamin D level was significantly lower among females compared to males.  
24 Similar findings have been reported among adolescents from Saudi Arabia [39], India [9], Korea [31] and  
25 Taiwan [40]. This pattern is not common in other settings as reported from a clinic-based cross-sectional  
26 study in the US [28] or Italy [26]. In the Arab states in the Gulf region and India, cultural practices, such as  
27 type of clothing that covers the whole body and indoor lifestyle, have been proposed to exacerbate vitamin  
28 D deficiency among females. Indeed, we found males consistently reporting higher amount of outdoor  
29 exposure to sunlight compared to females. In addition, females reported consistently higher sun avoidance  
30 behavior such as using sunscreen and staying in shade or under an umbrella. Adjusting for the exposure to  
31 sunlight did not explain the whole association between vitamin D status and gender which could be due to  
32 residual confounding. We also collected data on the type of clothing among females using photo cards (no  
33 head covering, head covering, head and face covering), but vitamin D deficiency was too common among  
34 females, which did not allow for us to investigate the impact of type of dress on vitamin D status among  
35 females. In our setting, efforts to improve vitamin D level among adolescents should focus on females  
36 through encouragement of safe amount of exposure to sunlight and intake of vitamin D rich foods. Also the  
37  
38  
39  
40  
41  
42  
43  
44  
45  
46  
47  
48  
49  
50  
51  
52  
53  
54  
55  
56  
57  
58  
59  
60

1  
2  
3 current recommended doses for vitamin D supplement should take the difference between females and  
4 males into account and recommend higher doses for females compared to males.  
5  
6  
7

8  
9 Most of the students in Kuwait do not walk to schools and are mainly transported by cars or school buses.  
10  
11 The number of times student walk to/from school as well as the time spent on walking to/from school was  
12 significantly associated with vitamin D deficiency. Those who walk to/from schools were less likely to have  
13 vitamin D deficiency compared to those who used school bus or car. Walking to schools can be a good  
14 opportunity for sunlight exposure as well as increasing physical activity, which itself may improve vitamin D  
15 level. In a study in the US, physical activity was inversely associated with hypovitaminosis D but not related  
16 to vitamin D level [28] while in another study, vigorous physical activity was significantly associated with  
17 vitamin D level [29]. It has been proposed that physical activity may increase the level of vitamin D through  
18 increasing the time spent outdoor in sunlight or through reducing the risk of obesity [13]. However, in our  
19 study the total time spent on other physical/sport activities was significantly associated with vitamin D  
20 deficiency in univariate but not in multivariate analysis. Unlike walking to schools, most sport activities in our  
21 setting are practiced indoor or during night time due to severe hot weather which may explain the lack of  
22 association between total time spent on physical activities and vitamin D deficiency in multivariate analysis.  
23  
24 Like many other studies [25 28 31], BMI was inversely associated with vitamin D level, which has been  
25 attributed to the sequestration of vitamin D within the plentiful adipose tissue [41 42]. It has also been  
26 suggested that leptin, an adipocyte-derived hormone, might activate a pathway that inhibits renal synthesis  
27 of the active form of vitamin D [43].  
28  
29  
30  
31  
32  
33  
34  
35  
36  
37  
38  
39  
40  
41  
42  
43  
44  
45  
46  
47

48 In our study, sugary drinks were positively associated with the prevalence of vitamin D deficiency. This is  
49 similar to that reported from Saudi Arabia [36] and US [28]. Consumption of sugary drinks among  
50 adolescents usually occurs at the expense of milk consumption which contains vitamin D [44]. As a result, it  
51 has been proposed that the availability of vitamin D-fortified juices may help reduce vitamin D deficiency in  
52  
53  
54  
55

1  
2  
3 adolescents [28]. In our data those who consumed sugary drinks were less likely to consume milk (data not  
4 shown). Although milk consumption was not related to vitamin D deficiency it was significantly related to the  
5 vitamin D level in linear regression analysis.  
6  
7  
8  
9

10  
11 We found an association between passive smoking at household (reported by parents) and vitamin D  
12 deficiency among adolescents, which is interesting and has been reported before [40]. Only less than 1% of  
13 the adolescents in our setting reported active smoking. Smoking has also been reported to be a significant  
14 determinant for low vitamin D levels among adults in some studies [27] but not in others [45] and this issue  
15 remains controversial [27]. Furthermore, a recent study found no significant association between cotinine  
16 level and vitamin D deficiency among Korean adolescents [31]. One of the hypothesized mechanism is that  
17 smoking may reflect an overall less healthy life style including less physical activity and poor dietary habits  
18 [27]. A causal link has also been proposed as metabolites in cigarette's smoke can inhibit CYP27A1 activity  
19 [46], which is involved in vitamin D metabolism.  
20  
21  
22  
23  
24  
25  
26  
27  
28  
29  
30

### 31 Strengths and limitation

32  
33 This is the first study that measured vitamin D in a large nationally representative sample of adolescents in  
34 Kuwait. We used a measurement method that is recommended in epidemiological studies and gathered  
35 data from both parents and adolescents. However, we did not measure the skin color, which can be an  
36 important determinant for vitamin D synthesis in the skin during exposure to sunlight. We evaluated the  
37 dietary intake of vitamin D in only a subgroup of study participants. However, dietary intake of vitamin D is  
38 known to have a smaller contribution to vitamin D status compared to cutaneous synthesis in response to  
39 sun exposure [38] and data on vitamin D supplement were obtained from all participants.  
40  
41  
42  
43  
44  
45  
46  
47  
48  
49

### 50 Conclusion

51  
52 In conclusion, a high prevalence of vitamin D deficiency was noted among adolescents in Kuwait despite the  
53 abundant sunshine. This may reflect strong sun avoidance behavior as only less than 4% of adolescents  
54  
55



1  
2  
3 were vitamin D sufficient and most of them were on vitamin D supplements. An optimal vitamin D level is  
4 essential during adolescence; and vitamin D deficiency at this age represents a public health problem that  
5 should be addressed. First, our findings should help clear doubts on vitamin D deficiency among  
6 adolescents in Kuwait, which is a prerequisite for prevention initiatives. Second, sun exposure is the main  
7 source for vitamin D in this age group; therefore adequate outdoor daytime activities should be encouraged  
8 especially for females. Slight modifications in school environment to facilitate exposure to sunlight during  
9 school breaks between classes can be fruitful. With respect to vitamin D supplementation, we call for locally  
10 tailored guidelines in which females should have a higher amount of vitamin D supplement compared to  
11 males. Vitamin D fortification particularly for food products that are popular for adolescents in our setting  
12 should also be considered. Increasing exposure to sunlight and food fortification with vitamin D should not  
13 be considered mutually exclusive and both strategies can be adopted.  
14  
15  
16  
17  
18  
19  
20  
21  
22  
23  
24  
25  
26

### 27 **Acknowledgements**

28  
29 The authors acknowledge the assistance of Nadien Sameeh Rushdi and the team of data collectors. We  
30 also acknowledge the cooperation of all participating schools and the facilitation of the project by the  
31 Ministry of Education. We also appreciate the support and cooperation of the staff and management of The  
32 United Genetics Laboratories (Kuwait) in vitamin D analysis.  
33  
34  
35  
36  
37  
38  
39

### 40 **Authors' contributions**

41 AT contributed to the study design and data collection, analyzed the data and drafted the paper. He had full  
42 access to all the data and took responsibility for the integrity of the data. AR contributed to the design of the  
43 study and data collection in addition to the writing and revising the manuscript. RS and LS contributed to the  
44 design of the study and data collection in addition to revising the manuscript with significant intellectual  
45 input. AH contributed to the data collection and revised the manuscript.  
46  
47  
48  
49  
50  
51  
52  
53  
54  
55  
56  
57  
58  
59  
60

1  
2  
3 **Funding:** The work was supported and funded by Kuwait University- Research Project No. WF 02/13.  
4  
5

6  
7 **Competing interests:** The authors declare that they have no competing interests  
8  
9

10 **Data sharing statement:** No additional data are available.  
11  
12  
13  
14  
15  
16  
17  
18  
19  
20  
21  
22  
23  
24  
25  
26  
27  
28  
29  
30  
31  
32  
33  
34  
35  
36  
37  
38  
39  
40  
41  
42  
43  
44  
45  
46  
47  
48  
49  
50  
51  
52  
53  
54  
55  
56  
57  
58  
59  
60

For peer review only

## References

1. Mouratidou T, Vicente-Rodriguez G, Gracia-Marco L, et al. Associations of dietary calcium, vitamin D, milk intakes, and 25-hydroxyvitamin D with bone mass in Spanish adolescents: the HELENA study. *Journal of clinical densitometry : the official journal of the International Society for Clinical Densitometry* 2013;**16**(1):110-7 doi: 10.1016/j.jocd.2012.07.008[published Online First: Epub Date]].
2. Sharief S, Jariwala S, Kumar J, Muntner P, Melamed ML. Vitamin D levels and food and environmental allergies in the United States: results from the National Health and Nutrition Examination Survey 2005-2006. *The Journal of allergy and clinical immunology* 2011;**127**(5):1195-202 doi: 10.1016/j.jaci.2011.01.017[published Online First: Epub Date]].
3. Lucato P, Solmi M, Maggi S, et al. Low vitamin D levels increase the risk of type 2 diabetes in older adults: A systematic review and meta-analysis. *Maturitas* 2017;**100**:8-15 doi: 10.1016/j.maturitas.2017.02.016[published Online First: Epub Date]].
4. Bahrami A, Mazloun SR, Maghsoudi S, et al. High Dose Vitamin D Supplementation Is Associated With a Reduction in Depression Score Among Adolescent Girls: A Nine-Week Follow-Up Study. *Journal of dietary supplements* 2017:1-10 doi: 10.1080/19390211.2017.1334736[published Online First: Epub Date]].
5. Chowdhury R, Kunutsor S, Vitezova A, et al. Vitamin D and risk of cause specific death: systematic review and meta-analysis of observational cohort and randomised intervention studies. *BMJ (Clinical research ed.)* 2014;**348**:g1903 doi: 10.1136/bmj.g1903[published Online First: Epub Date]].
6. Hilger J, Friedel A, Herr R, et al. A systematic review of vitamin D status in populations worldwide. *The British journal of nutrition* 2014;**111**(1):23-45 doi: 10.1017/s0007114513001840[published Online First: Epub Date]].
7. Basatemur E, Horsfall L, Marston L, Rait G, Sutcliffe A. Trends in the Diagnosis of Vitamin D Deficiency. *Pediatrics* 2017;**139**(3) doi: 10.1542/peds.2016-2748[published Online First: Epub Date]].
8. Garg MK, Marwaha RK, Khadgawat R, et al. Efficacy of vitamin D loading doses on serum 25-hydroxy vitamin D levels in school going adolescents: an open label non-randomized prospective trial. *Journal of pediatric endocrinology & metabolism : JPEM* 2013;**26**(5-6):515-23 doi: 10.1515/jpem-2012-0390[published Online First: Epub Date]].
9. Kapil U, Pandey RM, Goswami R, et al. Prevalence of Vitamin D deficiency and associated risk factors among children residing at high altitude in Shimla district, Himachal Pradesh, India. *Indian journal of endocrinology and metabolism* 2017;**21**(1):178-83 doi: 10.4103/2230-8210.196031[published Online First: Epub Date]].
10. AlBuhairan FS, Tamim H, Al Dubayee M, et al. Time for an Adolescent Health Surveillance System in Saudi Arabia: Findings From "Jeeluna". *The Journal of adolescent health : official publication of the Society for Adolescent Medicine* 2015;**57**(3):263-9 doi: 10.1016/j.jadohealth.2015.06.009[published Online First: Epub Date]].
11. Kaddam IM, Al-Shaikh AM, Abaalkhail BA, et al. Prevalence of vitamin D deficiency and its associated factors in three regions of Saudi Arabia. *Saudi medical journal* 2017;**38**(4):381-90 doi: 10.15537/smj.2017.4.18753[published Online First: Epub Date]].
12. Mansour MM, Alhadidi KM. Vitamin D deficiency in children living in Jeddah, Saudi Arabia. *Indian journal of endocrinology and metabolism* 2012;**16**(2):263-9 doi: 10.4103/2230-8210.93746[published Online First: Epub Date]].
13. Valtuena J, Gonzalez-Gross M, Huybrechts I, et al. Factors associated with vitamin D deficiency in European adolescents: the HELENA study. *Journal of nutritional science and vitaminology* 2013;**59**(3):161-71

- 1  
2  
3 14. Glanz K, Yaroch AL, Dancel M, et al. Measures of sun exposure and sun protection practices for behavioral and  
4 epidemiologic research. *Archives of dermatology* 2008;**144**(2):217-22 doi: 10.1001/archdermatol.2007.46[published  
5 Online First: Epub Date]].  
6
- 7 15. UEA. Youth Physical Activity Questionnaire. Secondary Youth Physical Activity Questionnaire 2011. [http://epi-  
9 meta.medschl.cam.ac.uk/includes/speedy/pdf/PhysicalActivity%20V4%20SPEEDY-3.pdf](http://epi-<br/>8 meta.medschl.cam.ac.uk/includes/speedy/pdf/PhysicalActivity%20V4%20SPEEDY-3.pdf).
- 10 16. Al-Hazzaa HM, Al-Sobayel HI, Musaiger AO. Convergent validity of the Arab Teens Lifestyle Study (ATLS) physical  
11 activity questionnaire. *International journal of environmental research and public health* 2011;**8**(9):3810-20 doi:  
12 10.3390/ijerph8093810[published Online First: Epub Date]].
- 13  
14 17. Taylor C, Lamparello B, Kruczek K, Anderson EJ, Hubbard J, Misra M. Validation of a food frequency questionnaire  
15 for determining calcium and vitamin D intake by adolescent girls with anorexia nervosa. *Journal of the American  
16 Dietetic Association* 2009;**109**(3):479-85, 85 e1-3 doi: 10.1016/j.jada.2008.11.025[published Online First: Epub Date]].
- 17  
18 18. Papandreou D, achaniotis N, Lari M, Al Mussabi W. Validation of a Food Frequency Questionnaire for Vitamin D  
19 and Calcium Intake in Healthy Female College Students. *Food and Nutrition Sciences* 2014;**5**:2048-52
- 20  
21 19. Holick MF. Vitamin D deficiency. *The New England journal of medicine* 2007;**357**(3):266-81 doi:  
22 10.1056/NEJMra070553[published Online First: Epub Date]].
- 23  
24 20. Vogeser M. Quantification of circulating 25-hydroxyvitamin D by liquid chromatography-tandem mass spectrometry.  
25 *The Journal of steroid biochemistry and molecular biology* 2010;**121**(3-5):565-73 doi:  
26 10.1016/j.jsbmb.2010.02.025[published Online First: Epub Date]].
- 27  
28 21. Holick MF, Binkley NC, Bischoff-Ferrari HA, et al. Evaluation, treatment, and prevention of vitamin D deficiency: an  
29 Endocrine Society clinical practice guideline. *The Journal of clinical endocrinology and metabolism* 2011;**96**(7):1911-30  
30 doi: 10.1210/jc.2011-0385[published Online First: Epub Date]].
- 31  
32 22. Medicine SfAHa. Recommended vitamin D intake and management of low vitamin D status in adolescents: a  
33 position statement of the society for adolescent health and medicine. *The Journal of adolescent health : official  
34 publication of the Society for Adolescent Medicine* 2013;**52**(6):801-3 doi: 10.1016/j.jadohealth.2013.03.022[published  
35 Online First: Epub Date]].
- 36  
37 23. Braegger C, Campoy C, Colomb V, et al. Vitamin D in the healthy European paediatric population. *Journal of  
38 pediatric gastroenterology and nutrition* 2013;**56**(6):692-701 doi: 10.1097/MPG.0b013e31828f3c05[published Online  
39 First: Epub Date]].
- 40  
41 24. Vierucci F, Del Pistoia M, Fanos M, Erba P, Saggese G. Prevalence of hypovitaminosis D and predictors of vitamin  
42 D status in Italian healthy adolescents. *Italian journal of pediatrics* 2014;**40**:54 doi: 10.1186/1824-7288-40-54[published  
43 Online First: Epub Date]].
- 44  
45 25. Gonzalez-Gross M, Valtuena J, Breidenassel C, et al. Vitamin D status among adolescents in Europe: the Healthy  
46 Lifestyle in Europe by Nutrition in Adolescence study. *The British journal of nutrition* 2012;**107**(5):755-64 doi:  
47 10.1017/s0007114511003527[published Online First: Epub Date]].
- 48  
49 26. Vierucci F, Del Pistoia M, Fanos M, et al. Vitamin D status and predictors of hypovitaminosis D in Italian children  
50 and adolescents: a cross-sectional study. *European journal of pediatrics* 2013;**172**(12):1607-17 doi: 10.1007/s00431-  
51 013-2119-z[published Online First: Epub Date]].
- 52  
53 27. Kassi EN, Stavropoulos S, Kokkoris P, et al. Smoking is a significant determinant of low serum vitamin D in young  
54 and middle-aged healthy males. *Hormones (Athens, Greece)* 2015;**14**(2):245-50 doi:  
55 10.14310/horm.2002.1521[published Online First: Epub Date]].  
56  
57  
58  
59  
60

- 1  
2  
3 28. Gordon CM, DePeter KC, Feldman HA, Grace E, Emans SJ. Prevalence of vitamin D deficiency among healthy  
4 adolescents. *Archives of pediatrics & adolescent medicine* 2004;**158**(6):531-7 doi:  
5 10.1001/archpedi.158.6.531[published Online First: Epub Date]].  
6  
7 29. Dong Y, Pollock N, Stallmann-Jorgensen IS, et al. Low 25-hydroxyvitamin D levels in adolescents: race, season,  
8 adiposity, physical activity, and fitness. *Pediatrics* 2010;**125**(6):1104-11 doi: 10.1542/peds.2009-2055[published Online  
9 First: Epub Date]].  
10  
11 30. Rockell JE, Green TJ, Skeaff CM, et al. Season and ethnicity are determinants of serum 25-hydroxyvitamin D  
12 concentrations in New Zealand children aged 5-14 y. *The Journal of nutrition* 2005;**135**(11):2602-8  
13  
14 31. Byun EJ, Heo J, Cho SH, Lee JD, Kim HS. Suboptimal vitamin D status in Korean adolescents: a nationwide study  
15 on its prevalence, risk factors including cotinine-verified smoking status and association with atopic dermatitis and  
16 asthma. *BMJ open* 2017;**7**(7):e016409 doi: 10.1136/bmjopen-2017-016409[published Online First: Epub Date]].  
17  
18 32. Zhang FF, Al Hooti S, Al Zenki S, et al. Vitamin D deficiency is associated with high prevalence of diabetes in  
19 Kuwaiti adults: results from a national survey. *BMC public health* 2016;**16**:100 doi: 10.1186/s12889-016-2758-  
20 x[published Online First: Epub Date]].  
21  
22 33. Al-Daghri NM. Vitamin D in Saudi Arabia: Prevalence, distribution and disease associations. *The Journal of steroid*  
23 *biochemistry and molecular biology* 2016 doi: 10.1016/j.jsbmb.2016.12.017[published Online First: Epub Date]].  
24  
25 34. Golbahar J, Al-Saffar N, Altayab Diab D, Al-Othman S, Darwish A, Al-Kafaji G. Predictors of vitamin D deficiency  
26 and insufficiency in adult Bahrainis: a cross-sectional study. *Public health nutrition* 2014;**17**(4):732-8 doi:  
27 10.1017/s136898001300030x[published Online First: Epub Date]].  
28  
29 35. Mahdy S, Al-Emadi SA, Khanjar IA, et al. Vitamin D status in health care professionals in Qatar. *Saudi medical*  
30 *journal* 2010;**31**(1):74-7  
31  
32 36. Sulimani RA, Mohammed AG, Alfadda AA, et al. Vitamin D deficiency and biochemical variations among urban  
33 Saudi adolescent girls according to season. *Saudi medical journal* 2016;**37**(9):1002-8 doi:  
34 10.15537/smj.2016.9.15248[published Online First: Epub Date]].  
35  
36 37. Thalib L, Al-Taiar A. Dust storms and the risk of asthma admissions to hospitals in Kuwait. *The Science of the total*  
37 *environment* 2012;**433**:347-51 doi: 10.1016/j.scitotenv.2012.06.082[published Online First: Epub Date]].  
38  
39 38. Holick MF. The D-lightful vitamin D for child health. *JPEN. Journal of parenteral and enteral nutrition* 2012;**36**(1  
40 Suppl):9S-19S doi: 10.1177/0148607111430189[published Online First: Epub Date]].  
41  
42 39. Al-Daghri NM, Al-Saleh Y, Aljohani N, et al. Vitamin D Deficiency and Cardiometabolic Risks: A Juxtaposition of  
43 Arab Adolescents and Adults. *PloS one* 2015;**10**(7):e0131315 doi: 10.1371/journal.pone.0131315[published Online  
44 First: Epub Date]].  
45  
46 40. Yao TC, Tu YL, Chang SW, et al. Suboptimal vitamin D status in a population-based study of Asian children:  
47 prevalence and relation to allergic diseases and atopy. *PloS one* 2014;**9**(6):e99105 doi:  
48 10.1371/journal.pone.0099105[published Online First: Epub Date]].  
49  
50 41. Wortsman J, Matsuoka LY, Chen TC, Lu Z, Holick MF. Decreased bioavailability of vitamin D in obesity. *The*  
51 *American journal of clinical nutrition* 2000;**72**(3):690-3  
52  
53 42. Walker GE, Ricotti R, Roccio M, et al. Pediatric obesity and vitamin D deficiency: a proteomic approach identifies  
54 multimeric adiponectin as a key link between these conditions. *PloS one* 2014;**9**(1):e83685 doi:  
55 10.1371/journal.pone.0083685[published Online First: Epub Date]].  
56  
57  
58  
59  
60

1  
2  
3 43. Tsuji K, Maeda T, Kawane T, Matsunuma A, Horiuchi N. Leptin stimulates fibroblast growth factor 23 expression in  
4 bone and suppresses renal 1 $\alpha$ ,25-dihydroxyvitamin D3 synthesis in leptin-deficient mice. *J Bone Miner Res*  
5 2010;**25**(8):1711-23 doi: 10.1002/jbmr.65[published Online First: Epub Date]].  
6

7 44. O'Connor TM, Yang SJ, Nicklas TA. Beverage intake among preschool children and its effect on weight status.  
8 *Pediatrics* 2006;**118**(4):e1010-8 doi: 10.1542/peds.2005-2348[published Online First: Epub Date]].  
9

10 45. Scragg R, Holdaway I, Jackson R, Lim T. Plasma 25-hydroxyvitamin D3 and its relation to physical activity and  
11 other heart disease risk factors in the general population. *Annals of epidemiology* 1992;**2**(5):697-703  
12

13 46. Aboraia AS, Makowski B, Bahja A, et al. Synthesis and CYP24A1 inhibitory activity of (E)-2-(2-substituted  
14 benzylidene)- and 2-(2-substituted benzyl)-6-methoxy-tetralones. *European journal of medicinal chemistry*  
15 2010;**45**(10):4427-34 doi: 10.1016/j.ejmech.2010.07.001[published Online First: Epub Date]].  
16  
17  
18  
19  
20  
21  
22  
23  
24  
25  
26  
27

## 28 Figure legends

29  
30

31 **Figure (1):** Parathyroid hormone (PTH) with Serum 25-hydroxyvitamin D (25-OH-D) concentration.  
32 Individuals above the horizontal line (PTH  $\geq$  65.0 ng/L) are adolescents with secondary hyperthyroidism.  
33 Vertical lines represent the 25-OH-D cut-off used to define vitamin D deficiency, insufficiency and sufficiency  
34 (seven participants with 25-OH-D > 150 nmol/L were omitted).  
35  
36  
37  
38  
39  
40  
41  
42  
43  
44  
45  
46  
47  
48  
49  
50  
51  
52  
53  
54  
55  
56  
57  
58  
59  
60

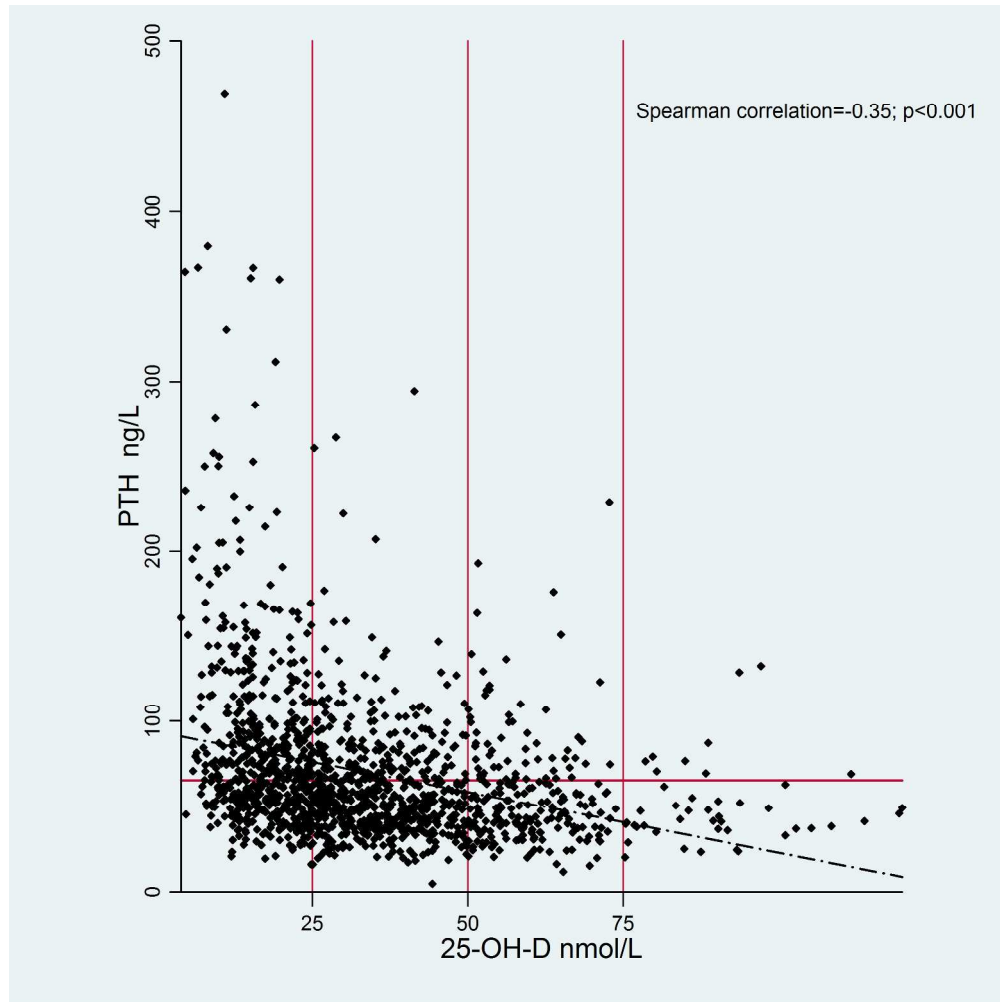

Figure (1): Parathyroid hormone (PTH) with Serum 25-hydroxyvitamin D (25-OH-D) concentration. Individuals above the horizontal line ( $\text{PTH} \geq 65.0$  ng/L) are adolescents with secondary hyperthyroidism. Vertical lines represent the 25-OH-D cut-off used to define vitamin D deficiency, insufficiency and sufficiency (seven participants with  $25\text{-OH-D} > 150$  nmol/L were omitted).

1058x1058mm (72 x 72 DPI)

Supplementary Table (1). Factors associated with vitamin D deficiency among adolescents in univariate analysis.

| Characteristics                          | Total<br>n=1150 | Prevalence of<br>vitamin D<br>deficiency<br>(%) | Prevalence Ratio<br>[95%CI] | p      |
|------------------------------------------|-----------------|-------------------------------------------------|-----------------------------|--------|
| <b>Gender</b>                            |                 |                                                 |                             |        |
| Male                                     | 694             | 488 (70.32)                                     | 1 [Ref.]                    | <0.001 |
| Female                                   | 722             | 662 (91.69)                                     | 1.30 [1.26- 1.33]           |        |
| <b>Age (year)</b>                        |                 |                                                 |                             |        |
| <12                                      | 527             | 409 (77.61)                                     | 1 [Ref.]                    | 0.024  |
| 12-                                      | 439             | 369 (84.05)                                     | 1.07 [1.01- 1.12]           |        |
| ≥13                                      | 450             | 372 (82.67)                                     | 1.06 [1.00- 1.10]           |        |
| <b>Nationality</b>                       |                 |                                                 |                             |        |
| Kuwaiti                                  | 1081            | 900 (83.26)                                     | 1 [Ref.]                    | <0.001 |
| Non-Kuwait                               | 335             | 250 (74.63)                                     | 0.90 [0.82-0.96]            |        |
| <b>Governorate</b>                       |                 |                                                 |                             |        |
| Capital                                  | 156             | 127 (81.41)                                     | 1 [Ref.]                    | 0.003  |
| Hawally                                  | 246             | 188 (76.42)                                     | 0.94 [0.82-1.03]            |        |
| Farawanya                                | 236             | 183 (77.54)                                     | 0.95 [0.83-1.04]            |        |
| Jahra                                    | 239             | 214 (89.54)                                     | 1.10 [1.02-1.15]            |        |
| Mubarak al-Kabeer                        | 148             | 124 (83.78)                                     | 1.03 [0.91-1.10]            |        |
| Ahmadi                                   | 371             | 296 (79.78)                                     | 0.98 [0.88-1.06]            |        |
| <b>Father's Education</b>                |                 |                                                 |                             |        |
| Primary/Intermediate/no formal education | 236             | 205 (86.86)                                     | 1 [Ref.]                    | <0.001 |
| Secondary (high school)                  | 344             | 297 (86.34)                                     | 0.99 [0.87-1.08]            |        |
| Diploma                                  | 261             | 220 (84.29)                                     | 0.95 [0.82-1.06]            |        |
| University & above                       | 542             | 399 (73.62)                                     | 0.78 [0.65-0.90]            |        |
| <b>Mother's Education</b>                |                 |                                                 |                             |        |
| Primary/Intermediate/no formal education | 183             | 153 (83.61)                                     | 1 [Ref.]                    | <0.001 |
| Secondary (high school)                  | 304             | 263 (86.51)                                     | 1.04 [0.94-1.12]            |        |
| Diploma                                  | 304             | 259 (85.20)                                     | 1.02 [0.91-1.10]            |        |
| University & above                       | 605             | 457 (75.54)                                     | 0.88 [0.76-0.99]            |        |
| <b>Total number of brother/sisters</b>   |                 |                                                 |                             |        |
| Zero-two                                 | 298             | 223 (74.83)                                     | 1 [Ref.]                    | 0.002  |
| Three-four                               | 538             | 434 (80.67)                                     | 1.05 [1.00-1.10]            |        |
| Five or more                             | 553             | 469 (84.81)                                     | 1.10 [1.04-1.13]            |        |
| <b>Passive smoking at household</b>      |                 |                                                 |                             |        |
| No                                       | 901             | 704 (78.14)                                     | 1 [Ref.]                    | <0.001 |
| Yes                                      | 489             | 426 (87.12)                                     | 1.11 [1.06-1.15]            |        |



|                                                               |       |               |      |             |  |        |
|---------------------------------------------------------------|-------|---------------|------|-------------|--|--------|
| <b>Times per week consumed breakfast not prepared at home</b> |       |               |      |             |  |        |
| Zero                                                          | 624   | 484 (77.56)   | 1    | [Ref.]      |  | 0.019  |
| One-two times                                                 | 569   | 478 (84.01)   | 1.08 | [1.02-1.12] |  |        |
| Three-four                                                    | 117   | 98 (83.76)    | 1.07 | [0.97-1.14] |  |        |
| Five or more                                                  | 78    | 67 (85.90)    | 1.10 | [1.00-1.17] |  |        |
| <b>Times per week consumed dinner not prepared at home</b>    |       |               |      |             |  |        |
| Zero                                                          | 157   | 114 (72.61)   | 1    | [Ref.]      |  | 0.018  |
| One-two times                                                 | 878   | 719 (81.89)   | 1.09 | [1.03-1.14] |  |        |
| Three-four                                                    | 257   | 211 (82.10)   | 1.09 | [1.01-1.15] |  |        |
| Five or more                                                  | 86    | 75 (87.21)    | 1.14 | [1.04-1.19] |  |        |
| <b>Consumption of sugary drinks per week</b>                  |       |               |      |             |  |        |
| None                                                          | 171   | 123 (71.93)   | 1    | [Ref.]      |  | 0.002  |
| Once-Three times                                              | 772   | 633 (81.99)   | 1.09 | [1.04-1.14] |  |        |
| Four-Six                                                      | 171   | 135 (78.95)   | 1.07 | [0.98-1.13] |  |        |
| Seven/more                                                    | 299   | 256 (85.62)   | 1.12 | [1.07-1.17] |  |        |
| <b>Currently taking supplements</b>                           |       |               |      |             |  |        |
| No                                                            | 1,256 | 1,045 (83.20) | 1    | [Ref.]      |  | <0.001 |
| Yes                                                           | 158   | 103 (65.19)   | 0.78 | [0.68-0.88] |  |        |
| <b>Number of times walking to school per week</b>             |       |               |      |             |  |        |
| None                                                          | 1,158 | 982 (84.80)   | 1    | [Ref.]      |  | <0.001 |
| 1-8 times                                                     | 155   | 99 (63.87)    | 0.74 | [0.63-0.83] |  |        |
| Every day                                                     | 103   | 69 (66.99)    | 0.77 | [0.65-0.89] |  |        |
| <b>Time walking to school</b>                                 |       |               |      |             |  |        |
| None                                                          | 1,158 | 982 (84.80)   | 1    | [Ref.]      |  | <0.001 |
| ≤5 minutes                                                    | 80    | 50 (62.50)    | 0.71 | [0.56-0.84] |  |        |
| 6- 10 minutes                                                 | 76    | 53 (69.74)    | 0.80 | [0.65-0.93] |  |        |
| 11-15                                                         | 56    | 38 (67.86)    | 0.77 | [0.60-0.92] |  |        |
| 16 minutes or more                                            | 45    | 26 (57.78)    | 0.65 | [0.46-0.82] |  |        |
| <b>Time spent on physical activity per week</b>               |       |               |      |             |  |        |
| Low (lower tertile)                                           | 469   | 396 (84.43)   | 1    | [Ref.]      |  | 0.005  |
| Medium (middle tertile)                                       | 473   | 391 (82.66)   | 0.97 | [0.89-1.04] |  |        |
| High (higher tertile)                                         | 474   | 363 (76.58)   | 0.89 | [0.80-0.96] |  |        |
| <b>Body Mass Index Categories<sup>1</sup></b>                 |       |               |      |             |  |        |
| Normal weight                                                 | 601   | 465 (77.37)   | 1    | [Ref.]      |  | 0.001  |
| Overweight                                                    | 320   | 270 (84.38)   | 1.07 | [1.02-1.11] |  |        |

|                                                         |       |             |      |             |        |
|---------------------------------------------------------|-------|-------------|------|-------------|--------|
| Obese                                                   | 471   | 400 (84.93) | 1.08 | [1.03-1.11] |        |
| Under weight                                            | 24    | 15 (62.50)  | 0.84 | [0.59-1.02] |        |
| <b>Time outside per day 10:00 am- 4:00 pm week days</b> |       |             |      |             |        |
| Less than 30 minutes                                    | 657   | 563 (85.69) | 1    | [Ref.]      | <0.001 |
| 31 minutes to 1 hour                                    | 450   | 342 (76.00) | 0.87 | [0.80-0.94] |        |
| More than 1 hour to 2 hours                             | 222   | 178 (80.18) | 0.93 | [0.84-1.00] |        |
| More than 2 hours                                       | 87    | 67 (77.01)  | 0.88 | [0.74-0.99] |        |
| <b>Time outside per day 10:00 am- 4:00 pm week ends</b> |       |             |      |             |        |
| Less than 30 minutes                                    | 494   | 425 (86.03) | 1    | [Ref.]      | 0.003  |
| 31 minutes to 1 hour                                    | 312   | 257 (82.37) | 0.94 | [0.85-1.02] |        |
| More than 1 hour to 2 hours                             | 255   | 198 (77.65) | 0.87 | [0.76-0.96] |        |
| More than 2 hours to 3 hours                            | 185   | 142 (76.76) | 0.85 | [0.74-0.96] |        |
| More than 3 hours                                       | 169   | 127 (75.15) | 0.83 | [0.71-0.94] |        |
| <b>Wearing sunscreen</b>                                |       |             |      |             |        |
| Never                                                   | 1,100 | 874 (79.45) | 1    | [Ref.]      | 0.013  |
| Rarely                                                  | 77    | 65 (84.42)  | 1.06 | [0.94-1.13] |        |
| Sometimes                                               | 160   | 140 (87.50) | 1.09 | [1.02-1.14] |        |
| Often/always                                            | 79    | 71 (89.87)  | 1.12 | [1.02-1.18] |        |
| <b>Staying in shade or under an umbrella</b>            |       |             |      |             |        |
| Never                                                   | 493   | 396 (80.32) | 1    | [Ref.]      | 0.04   |
| Rarely                                                  | 97    | 70 (72.16)  | 0.90 | [0.78-1.01] |        |
| Sometimes                                               | 363   | 301 (82.92) | 1.03 | [0.96-1.08] |        |
| Often                                                   | 205   | 162 (79.02) | 0.98 | [0.90-1.05] |        |
| Always                                                  | 257   | 220 (85.60) | 1.06 | [0.99-1.11] |        |

%s are row percentages. <sup>1</sup>according to WHO growth charts.

**STROBE 2007 (v4) checklist of items to be included in reports of observational studies in epidemiology\***  
**Checklist for cohort, case-control, and cross-sectional studies (combined)**

| Section/Topic             | Item # | Recommendation                                                                                                                                                                                                                                                                                                                                                                                                                                                         | Reported on page #          |
|---------------------------|--------|------------------------------------------------------------------------------------------------------------------------------------------------------------------------------------------------------------------------------------------------------------------------------------------------------------------------------------------------------------------------------------------------------------------------------------------------------------------------|-----------------------------|
| Title and abstract        | 1      | (a) Indicate the study's design with a commonly used term in the title or the abstract                                                                                                                                                                                                                                                                                                                                                                                 | Page 1                      |
|                           |        | (b) Provide in the abstract an informative and balanced summary of what was done and what was found                                                                                                                                                                                                                                                                                                                                                                    | Page 3                      |
| <b>Introduction</b>       |        |                                                                                                                                                                                                                                                                                                                                                                                                                                                                        |                             |
| Background/rationale      | 2      | Explain the scientific background and rationale for the investigation being reported                                                                                                                                                                                                                                                                                                                                                                                   | Page 5                      |
| Objectives                | 3      | State specific objectives, including any pre-specified hypotheses                                                                                                                                                                                                                                                                                                                                                                                                      | Page 5                      |
| <b>Methods</b>            |        |                                                                                                                                                                                                                                                                                                                                                                                                                                                                        |                             |
| Study design              | 4      | Present key elements of study design early in the paper                                                                                                                                                                                                                                                                                                                                                                                                                | Page 6                      |
| Setting                   | 5      | Describe the setting, locations, and relevant dates, including periods of recruitment, exposure, follow-up, and data collection                                                                                                                                                                                                                                                                                                                                        | Page 6- Page 8 and Page 14  |
| Participants              | 6      | (a) <i>Cohort study</i> —Give the eligibility criteria, and the sources and methods of selection of participants. Describe methods of follow-up<br><i>Case-control study</i> —Give the eligibility criteria, and the sources and methods of case ascertainment and control selection. Give the rationale for the choice of cases and controls<br><i>Cross-sectional study</i> —Give the eligibility criteria, and the sources and methods of selection of participants | Page 6                      |
|                           |        | (b) <i>Cohort study</i> —For matched studies, give matching criteria and number of exposed and unexposed<br><i>Case-control study</i> —For matched studies, give matching criteria and the number of controls per case                                                                                                                                                                                                                                                 |                             |
| Variables                 | 7      | Clearly define all outcomes, exposures, predictors, potential confounders, and effect modifiers. Give diagnostic criteria, if applicable                                                                                                                                                                                                                                                                                                                               | Page 6 and Page 7           |
| Data sources/ measurement | 8*     | For each variable of interest, give sources of data and details of methods of assessment (measurement). Describe comparability of assessment methods if there is more than one group                                                                                                                                                                                                                                                                                   | Page 6 and Page 7           |
| Bias                      | 9      | Describe any efforts to address potential sources of bias                                                                                                                                                                                                                                                                                                                                                                                                              | Page 6, Page 12 and Page 17 |
| Study size                | 10     | Explain how the study size was arrived at                                                                                                                                                                                                                                                                                                                                                                                                                              | Page 13                     |
| Quantitative variables    | 11     | Explain how quantitative variables were handled in the analyses. If applicable, describe which groupings were chosen and why                                                                                                                                                                                                                                                                                                                                           | Page 7 and Page 8           |
| Statistical methods       | 12     | (a) Describe all statistical methods, including those used to control for confounding                                                                                                                                                                                                                                                                                                                                                                                  | Page 7 and Page 8           |
|                           |        | (b) Describe any methods used to examine subgroups and interactions                                                                                                                                                                                                                                                                                                                                                                                                    | Page 7 and Page 8           |
|                           |        | (c) Explain how missing data were addressed                                                                                                                                                                                                                                                                                                                                                                                                                            | These were minimum.         |

|                          |     |                                                                                                                                                                                                                                                                                                           |                                                |
|--------------------------|-----|-----------------------------------------------------------------------------------------------------------------------------------------------------------------------------------------------------------------------------------------------------------------------------------------------------------|------------------------------------------------|
|                          |     | (d) <i>Cohort study</i> —If applicable, explain how loss to follow-up was addressed<br><i>Case-control study</i> —If applicable, explain how matching of cases and controls was addressed<br><i>Cross-sectional study</i> —If applicable, describe analytical methods taking account of sampling strategy | Page 8                                         |
|                          |     | (e) Describe any sensitivity analyses                                                                                                                                                                                                                                                                     |                                                |
| <b>Results</b>           |     |                                                                                                                                                                                                                                                                                                           |                                                |
| Participants             | 13* | (a) Report numbers of individuals at each stage of study—eg numbers potentially eligible, examined for eligibility, confirmed eligible, included in the study, completing follow-up, and analysed                                                                                                         | Page 8                                         |
|                          |     | (b) Give reasons for non-participation at each stage                                                                                                                                                                                                                                                      | Page 8                                         |
|                          |     | (c) Consider use of a flow diagram                                                                                                                                                                                                                                                                        |                                                |
| Descriptive data         | 14* | (a) Give characteristics of study participants (eg demographic, clinical, social) and information on exposures and potential confounders                                                                                                                                                                  | Table 1 page 9                                 |
|                          |     | (b) Indicate number of participants with missing data for each variable of interest                                                                                                                                                                                                                       | Table 1 , Table 2 and also supplementary table |
|                          |     | (c) <i>Cohort study</i> —Summarise follow-up time (eg, average and total amount)                                                                                                                                                                                                                          |                                                |
| Outcome data             | 15* | <i>Cohort study</i> —Report numbers of outcome events or summary measures over time                                                                                                                                                                                                                       |                                                |
|                          |     | <i>Case-control study</i> —Report numbers in each exposure category, or summary measures of exposure                                                                                                                                                                                                      |                                                |
|                          |     | <i>Cross-sectional study</i> —Report numbers of outcome events or summary measures                                                                                                                                                                                                                        | Page 10                                        |
| Main results             | 16  | (a) Give unadjusted estimates and, if applicable, confounder-adjusted estimates and their precision (eg, 95% confidence interval). Make clear which confounders were adjusted for and why they were included                                                                                              |                                                |
|                          |     | (b) Report category boundaries when continuous variables were categorized                                                                                                                                                                                                                                 | All tables                                     |
|                          |     | (c) If relevant, consider translating estimates of relative risk into absolute risk for a meaningful time period                                                                                                                                                                                          |                                                |
| Other analyses           | 17  | Report other analyses done—eg analyses of subgroups and interactions, and sensitivity analyses                                                                                                                                                                                                            | Page 12                                        |
| <b>Discussion</b>        |     |                                                                                                                                                                                                                                                                                                           |                                                |
| Key results              | 18  | Summarise key results with reference to study objectives                                                                                                                                                                                                                                                  | Page 13                                        |
| Limitations              | 19  | Discuss limitations of the study, taking into account sources of potential bias or imprecision. Discuss both direction and magnitude of any potential bias                                                                                                                                                | Page 16                                        |
| Interpretation           | 20  | Give a cautious overall interpretation of results considering objectives, limitations, multiplicity of analyses, results from similar studies, and other relevant evidence                                                                                                                                | Page 17                                        |
| Generalisability         | 21  | Discuss the generalisability (external validity) of the study results                                                                                                                                                                                                                                     | Page 17                                        |
| <b>Other information</b> |     |                                                                                                                                                                                                                                                                                                           |                                                |
| Funding                  | 22  | Give the source of funding and the role of the funders for the present study and, if applicable, for the original study on which the present article is based                                                                                                                                             | Page 18                                        |

1  
2  
3  
4  
5  
6  
7  
8  
9  
10  
11  
12  
13  
14  
15  
16  
17  
18  
19  
20  
21  
22  
23  
24  
25  
26  
27  
28  
29  
30  
31  
32  
33  
34  
35  
36  
37  
38  
39  
40  
41  
42  
43  
44  
45  
46  
47

\*Give information separately for cases and controls in case-control studies and, if applicable, for exposed and unexposed groups in cohort and cross-sectional studies.  
**Note:** An Explanation and Elaboration article discusses each checklist item and gives methodological background and published examples of transparent reporting. The STROBE checklist is best used in conjunction with this article (freely available on the Web sites of PLoS Medicine at <http://www.plosmedicine.org/>, Annals of Internal Medicine at <http://www.annals.org/>, and Epidemiology at <http://www.epidem.com/>). Information on the STROBE Initiative is available at [www.strobe-statement.org](http://www.strobe-statement.org).

For peer review only

# BMJ Open

## Vitamin D Status among Adolescents in Kuwait: A Cross-sectional Study.

|                                 |                                                                                                                                                                                                                                                                                                                                                                                                                                                                                                                                                                   |
|---------------------------------|-------------------------------------------------------------------------------------------------------------------------------------------------------------------------------------------------------------------------------------------------------------------------------------------------------------------------------------------------------------------------------------------------------------------------------------------------------------------------------------------------------------------------------------------------------------------|
| Journal:                        | <i>BMJ Open</i>                                                                                                                                                                                                                                                                                                                                                                                                                                                                                                                                                   |
| Manuscript ID                   | bmjopen-2017-021401.R3                                                                                                                                                                                                                                                                                                                                                                                                                                                                                                                                            |
| Article Type:                   | Research                                                                                                                                                                                                                                                                                                                                                                                                                                                                                                                                                          |
| Date Submitted by the Author:   | 29-Jun-2018                                                                                                                                                                                                                                                                                                                                                                                                                                                                                                                                                       |
| Complete List of Authors:       | Al-Taiar, Abdullah; Faculty of Medicine, Kuwait University, Department of Community Medicine and Behavioural Sciences<br>Rahman , Abdur ; College of Life Sciences, Kuwait University, Department of Food Science and Nutrition<br>Al-Sabah, Reem; Faculty of Medicine, Kuwait University, Department of Community Medicine and Behavioural Sciences<br>Shaban, Lemia ; College of Life Sciences, Kuwait University, Department of Food Science and Nutrition<br>Al-Harbi, Anwar ; Kuwait Institute for Scientific Research , Department of Science and Nutrition |
| <b>Primary Subject Heading</b>: | Nutrition and metabolism                                                                                                                                                                                                                                                                                                                                                                                                                                                                                                                                          |
| Secondary Subject Heading:      | Epidemiology, Global health, Paediatrics, Public health                                                                                                                                                                                                                                                                                                                                                                                                                                                                                                           |
| Keywords:                       | PUBLIC HEALTH, Vitamin D, Adolescents, school children, Kuwait                                                                                                                                                                                                                                                                                                                                                                                                                                                                                                    |
|                                 |                                                                                                                                                                                                                                                                                                                                                                                                                                                                                                                                                                   |

SCHOLARONE™  
Manuscripts

only

## Vitamin D Status among Adolescents in Kuwait: A Cross-sectional Study.

Abdullah Al-Taiar<sup>1</sup>, Abdur Rahman<sup>2</sup>, Reem Al-Sabah<sup>1</sup>, Lemia Shaban<sup>2</sup>, Anwar Al-Harbi<sup>3</sup>

<sup>1</sup> Department of Community Medicine and Behavioural Sciences

Faculty of Medicine, Kuwait University,

Box: 24923 Safat-13110 Kuwait.

<sup>2</sup> Department of Food Science and Nutrition

College of Life Sciences, Kuwait University,

Box 5969, Safat-13060, Kuwait.

<sup>3</sup> Kuwait Institute for Scientific Research,

Department of Science and Nutrition,

Box: 24885 Safat-13109, Kuwait.

### **Before publication corresponding author:**

Dr Abdullah Al-Taiar

Associate Professor of Epidemiology

Department Community Medicine and Behavioural Sciences,

Faculty of Medicine, Kuwait University,

Box: 24923 Safat-13110 Kuwait.

Tel: +965-24986553

Fax: +965-5338948

E-mail: [altaiar@hsc.edu.kw](mailto:altaiar@hsc.edu.kw)

1  
2  
3 **After publication corresponding author:**  
4

5 Abdur Rahman

6  
7 Associate Professor

8  
9 Department of Food Science and Nutrition,

10  
11 College of Life Sciences, Kuwait University,

12  
13 Box: 5969 Safat-13060 Kuwait.

14  
15 Tel: +965-249633055

16  
17 Fax: +965-22513929

18  
19 E-mail: [abdurrahman.ahmad@ku.edu.kw](mailto:abdurrahman.ahmad@ku.edu.kw)  
20  
21  
22  
23  
24  
25  
26  
27  
28  
29  
30  
31  
32  
33  
34  
35  
36  
37  
38  
39  
40  
41  
42  
43  
44  
45  
46  
47  
48  
49  
50  
51  
52  
53  
54  
55  
56  
57  
58  
59  
60



## Abstract

### Objectives

In Kuwait, as in many Arab states in the gulf region, there are limited data on the prevalence of vitamin D deficiency among healthy adolescents. This study aimed to estimate the prevalence of vitamin D deficiency in a nationally representative sample of adolescents and investigate factors associated with vitamin D status.

### Methods

A cross-sectional study was conducted on 1416 adolescents aged 11-16 years, who were randomly selected from middle schools in all governorates of Kuwait. Data were collected from parents through self-administered questionnaire and from adolescents through face-to-face interview. Vitamin D was measured using liquid chromatography-tandem mass spectrometry (LC-MS/MS). Logistic regression was used to investigate the independent factors associated with vitamin D status.

### Results

The Prevalence of vitamin D deficiency was 81.21% (95%CI: 71.61-90.81%) while severe deficiency was 39.48%. Only 3.60% of adolescents were vitamin D sufficient. Prevalence of vitamin D deficiency was significantly higher among females compared to males (91.69% vs. 70.32%;  $p < 0.001$ ). There was a significant inverse correlation between vitamin D and Parathyroid hormone (Spearman correlation = -0.35;  $p < 0.001$ ). In the final model, gender, age, governorate, parental education, body mass index, vitamin D supplement and number of times the adolescents walk to schools per week were all significantly related to vitamin D deficiency.

### Conclusion

High prevalence of vitamin D deficiency was noted among adolescents in Kuwait despite the abundant sunshine which may reflect strong sun avoidance behavior. Adequate outdoor daytime activities should be encouraged especially for females. We call for locally tailored guidelines for vitamin D supplement in which females should have a higher dose compared to males.

**Keywords:** Vitamin D, adolescents, Kuwait, Middle East, school children

### Strengths and limitations of this study

- This is the first study that aimed to estimate the prevalence of vitamin D on a large nationally representative sample of healthy adolescents in Kuwait.
- We measured vitamin D using the recommended laboratory methodology and gathered data from both parents and adolescents.
- We did not measure the skin color, which can be an important determinant for vitamin D synthesis in the skin.

## Introduction

An optimal vitamin D status is extremely important during adolescence for proper growth and bone mineral accrual [1]. In addition to its critical role in bone health, several observational studies have linked vitamin D deficiency to various disease conditions during adolescence or adulthood such as asthma and allergies [2], type 2 diabetes [3], depression [4], cancer and even all-cause mortality [5]. However, the results of randomized control trials, which tested the impact of vitamin D supplement on the risk of these disease conditions, remain inconclusive. For example, there was no clear evidence from randomized controlled trials that vitamin D supplement reduces the risk of cancer [6], asthma [7], cardiovascular diseases [8], depression [9] or overall mortality [10].

Several studies have evaluated the prevalence of vitamin D deficiency and insufficiency during adolescence reporting high prevalence of vitamin D deficiency worldwide [11 12]. This was the case even in countries with abundant sunshine, which is the main factor for endogenous vitamin D synthesis. For example, in India the prevalence of vitamin D deficiency among adolescents was reported to be 85-98% [13 14] while in Saudi Arabia it was found to be around 96% [15]. In Arab states in the Gulf region or the broader Middle East, there is paucity of data on vitamin D status in pediatric and adolescents populations. The few studies that showed a high prevalence of vitamin D deficiency in adolescents suffered from major methodological weaknesses [15-17]. These include small sample size, lack of proper sampling technique or using less optimal laboratory method to measure vitamin D. It is also known that factors which influence vitamin D status such as avoiding sun exposure, skin pigmentation, high body mass index (BMI) and dietary factors, particularly the lack of vitamin D supplement and intake of vitamin D rich foods [18] are all on rise in Arab states in the Gulf region. The aim of the present study was therefore to assess vitamin D status among adolescents living in Kuwait, a country with a plenty of sun shine, and to investigate factors associated with low vitamin D level.

## Methods

### Study population and study participants

Kuwait is a small country at latitude (29.3759° N) with a population of 4.2 million. Approximately, 25% of population is under the age of 19-year. The study population comprised students in the age between 11 and 16 years in the public middle schools from all governorates of Kuwait. A school based cross-sectional study was conducted on students from 12 public middle schools that were selected using a stratified multistage cluster random sampling with a probability proportional to size. The sample allocation in each governorate was based on the relative size of that governorate as judged by the total number of students in the governorate. Students with major chronic disease conditions are registered in each school and these were excluded from the study. However, students with minor illnesses or self-reported illness were included in the study. The type of illness was recorded during data collection and included in the analysis. The study was funded by Kuwait University and approved by The Ethics Committee at The Ministry of Health in Kuwait (Ref. No. 2015/248) as well as The Ethics Committee at Health Sciences Centre, Kuwait University (Ref. No. DR/EC/2338).

### Data Collection

Data were collected (including blood samples) in February, March and April, 2016. An informed consent was sent to the parents along with a self-administered questionnaire on parents' level of education (No formal education, primary/intermediate, high school, diploma, university and above), income, type of housing, number of siblings of the index child, passive smoking at household and the number of times per week the index child had a meal prepared outside home during the last three months. After obtaining written informed consent from the parents and verbal consent from the school children, trained dedicated personnel carried out face-to-face interviews with the students using a structured questionnaire. The questionnaire was carefully developed after extensive review of the literature and was pilot tested on 20 students who were not included in the study. It comprised questions on habitual sun exposure during the last three

1  
2  
3 months, which was assessed by the core questions developed to measure the exposure to sunlight in  
4 adolescents as described by Glanz et al. [19]. We also collected data on smoking habits, physical activity  
5 and dietary intake. Data on physical activity were collected using a questionnaire that was developed based  
6 on the Youth Physical Activity Questionnaire in UK [20] and The Arab teens lifestyle study [21]. The  
7 questionnaire was validated among high school students and showed strong correlation with data collected  
8 by accelerometers (Spearman correlation= 0.92;  $p < 0.001$  for total steps count) (not published). Data on  
9 dietary intake of vitamin D were collected from only 200 students using food frequency questionnaire for  
10 calcium and vitamin D intake in adolescents [22], which has been validated in our setting [23]. Food models  
11 or serving containers were used to assist in estimating serving size. Measurements of standing height and  
12 body weight of the study subjects were assessed using a digital weight and height scale (Detecto®) in a  
13 standardized manner.  
14  
15  
16  
17  
18  
19  
20  
21  
22  
23  
24  
25

### 26 27 **Laboratory methods**

28  
29 Five ml of venous blood was collected in gel-containing tubes (SST II advance, BD vacutainer) from each  
30 participant by a trained nurse; and the samples were protected from light. On the same day, the samples  
31 were centrifuged at 2000 x g for 15 minutes and the serum was transferred to Eppendorf tubes and stored  
32 at -80°C until analysis. Serum 25-hydroxyvitamin D (25-OH-D) concentration is the best marker of vitamin D  
33 status because it is the major circulating form of vitamin D, reflecting both the amount produced in the skin  
34 after sun exposure and the amount consumed in foods [24]. It was measured in College of American  
35 Pathologists CAP-accredited laboratory by liquid chromatography-tandem mass spectrometry (LC-MS/MS),  
36 which is the recommended method for vitamin D assessment in epidemiological studies [25]. According to  
37 the Endocrine Society [26] and the Society for Adolescent Health and Medicine [27], we used the following  
38 cut-off of 25-OH-D to define vitamin D status: vitamin D deficiency  $< 50$  nmol/L (20 ng/mL); vitamin D  
39 insufficiency 50-75 nmol/L (20-30 ng/mL); and vitamin D sufficiency  $\geq 75$  nmol/L (30 ng/mL). Thus,  
40 hypovitaminosis D was defined in the presence of 25-OH-D levels  $< 75.0$  nmol/L (30 ng/mL). Furthermore,  
41  
42  
43  
44  
45  
46  
47  
48  
49  
50  
51  
52  
53  
54  
55

1  
2  
3 severe vitamin D deficiency was defined as 25-OH-D levels < 25.0 nmol/L (10 ng/mL) [28]. Serum intact  
4 Parathyroid hormone (PTH) was measured using the Access Intact PTH chemiluminescent immunoassay  
5 with the Unicel Dxl 800 Beckman Coulter analyzer using commercial kit (Cat. # A16972). Similar to other  
6 studies, PTH level  $\geq$  65.0 ng/L was suggestive of hyperparathyroidism [29] although there is no consensus  
7 on this cut-off point.  
8  
9  
10  
11  
12

### 13 14 15 16 **Patient and Public Involvement**

17 Public were not directly involved in the design of this study. However, schools were involved in approaching  
18 the parents to obtain their consents. We also sent the results of the laboratory tests of each participant to  
19 the parents through schools using closed envelopes to ensure confidentiality.  
20  
21  
22  
23  
24

### 25 26 **Data analysis**

27 Data were double entered into specifically designed database using Epidata Entry. Data analysis was  
28 conducted using Stata (StataCorp. 2011. Release 12). BMI was calculated as weight (Kg) divided by height  
29 squared ( $m^2$ ). Weight status was categorized into normal, overweight and obese according to WHO growth  
30 charts. Chi-squared test was used to test differences in categorical variables. Because vitamin D deficiency  
31 was a common outcome and the log-binomial model failed to converge, a modified version of multiple  
32 logistic regression that calculates prevalence ratio was used to study the association between each  
33 presumed risk factor and vitamin D deficiency (25-OH-D < 50 nmol/L). Variables that were found to be  
34 statistically significant at 15% level of significance were considered in multivariate analysis. Variables were  
35 divided into groups (e.g. socio-demographic, sun exposure, etc) and were added sequentially to the model.  
36 Statistical significance of variables was evaluated by likelihood ratio test which compares the model with  
37 and without the variable. Goodness of fit of the final model was evaluated by Hosmer-Lemeshow test.  
38 Factors with  $p < 0.05$  were deemed to be statistically significant. The analysis above was repeated using  
39 hypovitaminosis (25-OH-D < 75.0 nmol/L) as the binary outcome. We also conducted multiple linear  
40  
41  
42  
43  
44  
45  
46  
47  
48  
49  
50  
51  
52  
53  
54  
55

1  
2  
3 regression analysis using vitamin D level as a continuous outcome (after log-transformation) and reported  
4 the results in the text. Because of the complex structure of this survey data, we used survey method, which  
5 gives more precise estimates of standard error.  
6  
7  
8  
9  
10

## 11 **Results**

12  
13 Of 1583 parents approached, 161 refused to participate (because children, parents or both refused).

14  
15 Another 6 samples were not sufficient to conduct blood analysis, thus the analysis below comprised 1416  
16 students. Table (1) shows the socio-demographic characteristics of the study group. The mean (SD) age  
17 was 12.48 (0.94) years and 694 (49.01%) were males.  
18  
19  
20  
21  
22  
23  
24  
25  
26  
27  
28  
29  
30  
31  
32  
33  
34  
35  
36  
37  
38  
39  
40  
41  
42  
43  
44  
45  
46  
47  
48  
49  
50  
51  
52  
53  
54  
55  
56  
57  
58  
59  
60

Table (1). Socio-demographic characteristics and vitamin D levels among adolescents in public middle schools in Kuwait.

| Characteristics                                  | Males             | Females            | Total             |
|--------------------------------------------------|-------------------|--------------------|-------------------|
|                                                  | n=694             | n=722              | N=1416            |
| <b>Age in years, Mean (SD) years</b>             | 12.56 (0.94)      | 12.41 (0.92)*      | 12.48 (0.94)      |
| <b>25-OH-D nmol/L, Median (IQR)</b>              | 39.80 (29.4-52.7) | 21.50 (14.7-30.7)* | 29.70 (19.2-44.2) |
|                                                  | <b>n (%)</b>      | <b>n (%)</b>       | <b>n (%)</b>      |
| <b>Nationality (N= 1416)</b>                     |                   |                    |                   |
| Kuwaiti                                          | 423 (60.95)       | 658 (91.14)*       | 1,081 (76.34)     |
| Non-Kuwait                                       | 271 (39.05)       | 64 (8.86)          | 335 (23.66)       |
| <b>Father's Education (N=1383)</b>               |                   |                    |                   |
| No formal education                              | 9 (1.33)          | 6 (0.85)*          | 15 (1.08)         |
| Primary/Intermediate                             | 95 (14.05)        | 126 (17.82)        | 221 (15.98)       |
| Secondary (high school)                          | 157 (23.22)       | 187 (26.45)        | 344 (24.87)       |
| Diploma                                          | 126 (18.64)       | 135 (19.09)        | 261 (18.87)       |
| University & above                               | 289 (42.75)       | 253 (35.79)        | 542 (39.19)       |
| <b>Mother's Education (N=1396)</b>               |                   |                    |                   |
| No formal education                              | 18 (2.64)         | 13 (1.82)          | 31 (2.22)         |
| Primary/Intermediate                             | 79 (11.60)        | 73 (10.21)         | 152 (10.89)       |
| Secondary (high school)                          | 140 (20.56)       | 164 (22.94)        | 304 (21.78)       |
| Diploma                                          | 136 (19.97)       | 168 (23.50)        | 304 (21.78)       |
| University & above                               | 308 (45.23)       | 297 (41.54)        | 605 (43.34)       |
| <b>Father's Income (Kuwaiti Dinars) (N=1370)</b> |                   |                    |                   |
| Less than 500                                    | 64 (9.61)         | 27 (3.84)*         | 91 (6.64)         |
| 500 to 1000                                      | 168 (25.23)       | 136 (19.32)        | 304 (22.19)       |
| 1001 to 1500                                     | 175 (26.28)       | 246 (34.94)        | 421 (30.73)       |
| 1501 to 2000                                     | 100 (15.02)       | 119 (16.90)        | 219 (15.99)       |
| More than 2000                                   | 83 (12.46)        | 90 (12.78)         | 173 (12.63)       |
| Do not wish to tell                              | 76 (11.41)        | 86 (12.22)         | 162 (11.82)       |
| <b>Mother's Employment Status (N=1388)</b>       |                   |                    |                   |
| Housewife                                        | 267 (39.38)       | 221 (31.13)*       | 488 (35.16)       |
| Paid employment                                  | 307 (45.28)       | 373 (52.54)        | 680 (48.99)       |
| Others                                           | 104 (15.34)       | 116 (16.34)        | 220 (15.85)       |
| <b>Housing (N=1397)</b>                          |                   |                    |                   |
| Rented flat                                      | 301 (44.20)       | 209 (29.19)*       | 510 (36.51)       |
| Rented house                                     | 94 (13.80)        | 69 (9.64)          | 163 (11.67)       |
| Owned flat                                       | 17 (2.50)         | 42 (5.87)          | 59 (4.22)         |
| Owned house                                      | 269 (39.50)       | 396 (55.31)        | 665 (47.60)       |

IQR: Interquartile Range. All %s are column percentages. \* p<0.05 i.e. significant difference between males and females at 5% level of significance.



### Prevalence of vitamin D deficiency

The median (Interquartile Range, IQR) of 25-OH-D was 29.7 (19.2- 44.2) nmol/L. Prevalence of vitamin D deficiency was 81.21% (95%CI: 71.61-90.81%) while severe deficiency was 39.48%. Only 3.60% of the participants were vitamin D sufficient. Prevalence of vitamin D deficiency was significantly higher among females compared to males (91.69% vs. 70.32%;  $p<0.001$ ). Also, the median (IQR) of 25-OH-D was 39.8 (29.4- 52.7) nmol/L and 21.5 (14.7- 30.7) nmol/L among males and females, respectively ( $p<0.001$ ). There was no difference in the prevalence of vitamin D deficiency between Kuwaitis and non-Kuwaitis after stratification by gender. There was significant inverse correlation between 25-OH-D and PTH (Spearman correlation=-0.35;  $p<0.001$ ). In relation to vitamin D status, elevated PTH (secondary hyperparathyroidism PTH  $\geq 65$  ng/L. i.e. 6.89 pmol/L) was detected in 55.81%, 31.30% and 27.57% of adolescents with vitamin D severe deficiency, deficiency and insufficiency, respectively. If we used the reference range of the laboratory where the samples were tested (PTH: 1.3-9.3 pmol/L), the prevalence of secondary hyperparathyroidism would be 32.56%, 12.35%, and 11.68% among adolescents with vitamin D severe deficiency, deficiency and insufficiency, respectively. The median [IQR] PTH was significantly different dependent on vitamin D status (severe deficiency 7.37 [5.44-10.55] pmol/L; deficiency 5.63[4.13-7.40] pmol/L; insufficiency 5.14[3.87-6.99] pmol/L; sufficiency 4.31[3.75- 5.73] pmol/L;  $p<0.001$ ). The actual relationship between 25-OH-D and PTH levels is shown in figure (1).

Table (2): Factors associated with vitamin D deficiency among adolescence in multivariate analysis.

| Characteristics                                        | Total | Prevalence of<br>vitamin D<br>deficiency<br>n (%) | Prevalence Ratio<br>[95%CI] | P      |
|--------------------------------------------------------|-------|---------------------------------------------------|-----------------------------|--------|
| <b>Gender</b>                                          |       |                                                   |                             |        |
| Male                                                   | 694   | 488 (70.32)                                       | 1 [Ref.]                    | <0.001 |
| Female                                                 | 722   | 662 (91.69)                                       | 1.20 [1.17- 1.21]           |        |
| <b>Age (year)</b>                                      |       |                                                   |                             |        |
| <12                                                    | 527   | 409 (77.61)                                       | 1 [Ref.]                    | 0.003  |
| 12-                                                    | 439   | 369 (84.05)                                       | 1.10 [1.04- 1.14]           |        |
| ≥13                                                    | 450   | 372 (82.67)                                       | 1.07 [1.01- 1.12]           |        |
| <b>Governorate</b>                                     |       |                                                   |                             |        |
| Capital                                                | 156   | 127 (81.41)                                       | 1 [Ref.]                    | <0.001 |
| Hawally                                                | 246   | 188 (76.42)                                       | 0.88 [0.73-1.01]            |        |
| Farawanya                                              | 236   | 183 (77.54)                                       | 0.85 [0.68-0.99]            |        |
| Jahra                                                  | 239   | 214 (89.54)                                       | 1.10 [0.98-1.17]            |        |
| Mubarak al-Kabeer                                      | 148   | 124 (83.78)                                       | 1.06 [0.93-1.14]            |        |
| Ahmadi                                                 | 371   | 296 (79.78)                                       | 1.06 [0.95-1.13]            |        |
| <b>Father's Education</b>                              |       |                                                   |                             |        |
| Primary/Intermediate/no formal education               | 236   | 205 (86.86)                                       | 1 [Ref.]                    | <0.009 |
| Secondary (high school)                                | 344   | 297 (86.34)                                       | 1.04 [0.92-1.12]            |        |
| Diploma                                                | 261   | 220 (84.29)                                       | 1.01 [0.88-1.10]            |        |
| University & above                                     | 542   | 399 (73.62)                                       | 0.89 [0.76-1.01]            |        |
| <b>Passive smoking in household</b>                    |       |                                                   |                             |        |
| No                                                     | 901   | 704 (78.14)                                       | 1 [Ref.]                    | <0.006 |
| Yes                                                    | 489   | 426 (87.12)                                       | 1.08 [1.02-1.13]            |        |
| <b>Currently taking supplements</b>                    |       |                                                   |                             |        |
| No                                                     | 1,256 | 1,045 (83.20)                                     | 1 [Ref.]                    | <0.001 |
| Yes                                                    | 158   | 103 (65.19)                                       | 0.63 [0.49-0.76]            |        |
| <b>Consumption of sugary drinks per week</b>           |       |                                                   |                             |        |
| None                                                   | 171   | 123 (71.93)                                       | 1 [Ref.]                    | 0.002  |
| Once-Three times                                       | 772   | 633 (81.99)                                       | 1.11 [1.05-1.16]            |        |
| Four-Six times                                         | 171   | 135 (78.95)                                       | 1.07 [0.96-1.14]            |        |
| Seven/more times                                       | 299   | 256 (85.62)                                       | 1.15 [1.08-1.19]            |        |
| <b>Number of times walking to/from school per week</b> |       |                                                   |                             |        |
| None                                                   | 1,158 | 982 (84.80)                                       | 1 [Ref.]                    | <0.001 |
| 1-8 times                                              | 155   | 99 (63.87)                                        | 0.81 [0.68-0.93]            |        |
| Every day                                              | 103   | 69 (66.99)                                        | 0.77 [0.61-0.92]            |        |

**Body Mass Index Categories<sup>1</sup>**

|               |     |             |                  |       |
|---------------|-----|-------------|------------------|-------|
| Normal weight | 601 | 465 (77.37) | 1 [Ref.]         | 0.001 |
| Overweight    | 320 | 270 (84.38) | 1.08 [1.01-1.13] |       |
| Obese         | 471 | 400 (84.93) | 1.12 [1.07-1.16] |       |
| Underweight   | 24  | 15 (62.50)  | 0.93 [0.67-1.10] |       |

%s are row percentages. <sup>1</sup>according to WHO growth charts.

**Factors associated with vitamin D status**

Factors that showed significant association with vitamin D deficiency (25-OH-D < 50 nmol/L) in univariate analysis were gender, parental education, number of times per week the participants consumed breakfast or dinner prepared outside home, taking supplements, walking to/from school (instead of using school bus or car) in addition to BMI (Supplementary Table). Similarly, time spent outdoor per day (between 10:00 am and 4:00 pm) during weekdays and weekends in addition to wearing sunscreen and staying in shade or under an umbrella were all significant predictors in univariate analysis.

Table (2) shows the independent predictors for vitamin D deficiency in multivariate analysis. In the final model, gender, age, governorate, parental education, vitamin D supplement, and the number of times participant walks to/from school per week were all significantly related to vitamin D deficiency. Data from the food frequency questionnaire for calcium and vitamin D intake were available only for 200 study subjects, and of all food items, only eggs were significantly related to vitamin D deficiency in multivariate model (data not shown). We repeated the analysis above using hypovitaminosis (sufficient vs. insufficient/deficient) as a binary outcome. The same factors were found to be significantly related to hypovitaminosis, although mother's education (instead of father's education) was found to be significant in this analysis. We also used linear regression to identify the factors associated with vitamin D level as a continuous variable. Factors that showed significant association with vitamin D level in multivariate analysis were age, gender, governorate,

1  
2  
3 passive smoking at household, number of times per week the participants consumed breakfast prepared  
4 outside home in the last three months, time spent outdoor during weekdays, preference to stay in shade or  
5 under the umbrella, and BMI categories. With respect to dietary factors, milk and cheese, fast food  
6 hamburger and tuna fish were significantly associated with vitamin D level in univariate linear regression.  
7  
8 When these food items were introduced to the final model, only milk and tuna fish were significantly  
9 associated with vitamin D level. It is worth noting that the best model was able to explain only 45% of the  
10 variability in vitamin D level in this analysis.  
11  
12  
13  
14  
15  
16  
17  
18  
19

## 20 Discussion

21  
22 Although several reports have described vitamin D deficiency among adults in the Arab states in the Gulf  
23 region, there are limited data on the prevalence of vitamin D deficiency among healthy adolescents.  
24 We used a nationally representative sample to examine vitamin D levels in a large number of healthy  
25 adolescents, becoming to our knowledge the largest study focusing on this group in Kuwait. We used the  
26 recommended method to measure vitamin D level and demonstrated that vitamin D deficiency is too  
27 common despite the abundant sunshine. Secondary hyperparathyroidism due to vitamin D deficiency is also  
28 common and females had lower vitamin D levels compared to males.  
29  
30  
31  
32  
33  
34  
35  
36  
37  
38

39 In our setting, approximately, 81% and 15% of adolescents were vitamin D deficient or insufficient,  
40 respectively. This is higher than that reported among adolescents in European countries [30-32],  
41 Southeastern United States [33 34] or New Zealand [35]. Our finding is more akin to that reported from  
42 Saudi Arabia (95.6%) [15], India (85-98%) [13 14], or Korea where only 2.3% of adolescents were found to  
43 be vitamin D sufficient [36]. Our findings are also in accordance with the high prevalence reported  
44 consistently among adult population in Kuwait [37] or other countries in the Gulf region such as Saudi Arabia  
45 [38], Bahrain [39] and Qatar [40].  
46  
47  
48  
49  
50  
51  
52  
53  
54  
55

1  
2  
3 Similar to other studies among adolescents [29 33 41], our findings showed that a large number of those  
4 with low vitamin D level had evidence of secondary hyperparathyroidism. We reported a much higher  
5 prevalence of secondary hyperparathyroidism compared to other studies [29 41], which could be due to  
6 using lower PTH cut-off point to define secondary hyperthyroidism or using different laboratory method to  
7 measure PTH. Hyperparathyroidism, which potentially leads to increased bone resorption, is particularly  
8 important during adolescence because it is the critical period to achieve peak bone mass. Serum PTH  
9 decreased as 25-OH-D level increased with no clear threshold of serum 25-OH-D at which PTH level  
10 plateaued although very few participants had elevated PTH when 25-OH-D level was above 75 nmol/L  
11 (Figure 1). Although we did not measure markers of bone turnover, this provides an additional evidence that  
12 25-OH-D should be maintained above 75 nmol/L, which is the current cut-off point used to define vitamin D  
13 sufficiency in adolescents [26 27]. There were, however, adolescents with low vitamin D concentration  
14 without secondary hyperparathyroidism (Figure 1). This has been noted in other studies [33 41], the clinical  
15 significance of which is unknown in children and deserves further investigation.  
16  
17  
18  
19  
20  
21  
22  
23  
24  
25  
26  
27  
28  
29  
30  
31  
32  
33  
34

35 Because of the abundant sunshine in the Arab states in the Gulf region, there has been a lot of skepticism  
36 of vitamin D deficiency. Informal discussions, even among scientific community, in the region show strong  
37 denial attributing such low levels of vitamin D to poorly executed or faulty laboratory measurements. Our  
38 findings should eliminate doubts on vitamin D deficiency among adolescents in Kuwait and pave the way to  
39 look for practical solutions. Factors that may hinder cutaneous synthesis of vitamin D despite abundant  
40 sunshine may include dust storms (which occur almost in one third of the year in Kuwait [42]), an avoidance  
41 of sun exposure by indoor lifestyle, head/body covering or other cultural practices and the use of  
42 sunscreen. Self-reported exposure to sunlight was a significant predictor for vitamin D deficiency in  
43 univariate analysis but lost statistical significance in multivariate analysis. Most of adolescents in our setting  
44 avoid sunlight as only around 6% of the participants spent more than two hours outdoor per day between  
45  
46  
47  
48  
49  
50  
51  
52  
53  
54

1  
2  
3 10:00 am and 4:00 pm during weekdays (data not shown). Avoidance of sunlight has been suggested to be  
4 the underlying reason for the counterintuitive seasonal variation that has been reported in the region, where  
5 the prevalence of vitamin D deficiency is higher in the summer compared to the winter season [41]. Owing  
6 to the desert climate, avoiding sun exposure would be stronger during summer due to extremely high  
7 temperature. We collected blood samples in February, March and April, thus we were unable to describe  
8 seasonal variation in vitamin D status. Exposure to sunlight contributes up to 90–95% of the vitamin D  
9 supply, while the number of foods naturally containing a significant quantity of vitamin D is very limited  
10 except for some oily fish that is rarely consumed by adolescents worldwide and in our setting [43] (~5% of  
11 adolescents in our setting consumed salmon once per week or more). As such, education of parents and  
12 adolescents on the safe amount of sun exposure in addition to changes in the school environment to  
13 facilitate exposure to sunlight may produce the highest impact on vitamin D status among adolescents.  
14 There is no consensus on the duration of time, which adolescents can safely be exposed to direct sunlight.  
15 However, exposure of legs and arms for at least 15 minutes twice per week has been reported to be  
16 sufficient for adequate sun-induced cutaneous vitamin D synthesis in adolescents [43].  
17  
18  
19  
20  
21  
22  
23  
24  
25  
26  
27  
28  
29  
30  
31  
32  
33  
34  
35

36 Similar to other studies that investigated vitamin D deficiency among adolescents, females had a  
37 significantly higher prevalence of vitamin D deficiency compared to males even after adjusting for all  
38 potential confounders. Also, vitamin D level was significantly lower among females compared to males.  
39 Similar findings have been reported among adolescents from Saudi Arabia [44], India [14], Korea [36] and  
40 Taiwan [45]. This pattern is not common in other settings as reported from a clinic-based cross-sectional  
41 study in the US [33] or Italy [31]. In the Arab states in the Gulf region and India, cultural practices, such as  
42 type of clothing that covers the whole body and indoor lifestyle, have been proposed to exacerbate vitamin  
43 D deficiency among females. Indeed, we found males consistently reporting higher amount of outdoor  
44 exposure to sunlight compared to females. In addition, females reported consistently higher sun avoidance  
45 behavior such as using sunscreen and staying in shade or under an umbrella. Adjusting for self-reported  
46  
47  
48  
49  
50  
51  
52  
53  
54  
55

1  
2  
3 exposure to sunlight did not explain the whole association between vitamin D status and gender, which  
4 could be due to residual confounding. We also collected data on the type of clothing among females using  
5 photo cards (no head covering, head covering, head and face covering), but vitamin D deficiency was too  
6 common among females, which did not allow for us to investigate the impact of type of dress on vitamin D  
7 status among females. In our setting, efforts to improve vitamin D level among adolescents should focus on  
8 females through encouragement of safe amount of exposure to sunlight and/or intake of vitamin D rich  
9 foods. Also, the current guidelines for vitamin D supplement should take the difference between females  
10 and males into account and recommend higher doses for females compared to males.  
11  
12  
13  
14  
15  
16  
17  
18  
19  
20  
21

22 Most of the students in Kuwait do not walk to schools and are mainly transported by cars or school buses.  
23 The number of times student walk to/from school as well as the time spent on walking to/from school was  
24 significantly associated with vitamin D deficiency. Those who walk to/from schools were less likely to have  
25 vitamin D deficiency compared to those who used school bus or car. Walking to/from schools can be a good  
26 opportunity for sunlight exposure as well as increasing physical activity, which itself may improve vitamin D  
27 level. In a study in the US, physical activity was inversely associated with hypovitaminosis D but not related  
28 to vitamin D level [33] while in another study, vigorous physical activity was significantly associated with  
29 vitamin D level [34]. It has been proposed that physical activity may increase the level of vitamin D through  
30 increasing the time spent outdoor in sunlight or through reducing the risk of obesity [18]. However, in our  
31 study the total time spent on other physical/sport activities was significantly associated with vitamin D  
32 deficiency in univariate but not in multivariate analysis. Unlike walking to/from schools, most sport activities  
33 in our setting are practiced indoor or during night time due to severe hot weather which may explain the lack  
34 of association between total time spent on physical activities and vitamin D deficiency in multivariate  
35 analysis. Like many other studies [30 33 36], BMI was inversely associated with vitamin D level, which has  
36 been attributed to the sequestration of vitamin D within the plentiful adipose tissue [46 47]. It has also been  
37  
38  
39  
40  
41  
42  
43  
44  
45  
46  
47  
48  
49  
50  
51  
52  
53  
54  
55  
56  
57  
58  
59  
60

1  
2  
3 suggested that leptin, an adipocyte-derived hormone, might activate a pathway that inhibits renal synthesis  
4 of the active form of vitamin D [48].  
5  
6  
7  
8

9  
10 In our study, sugary drinks were positively associated with the prevalence of vitamin D deficiency. This is  
11 similar to that reported from Saudi Arabia [41] and US [33]. Consumption of sugary drinks among  
12 adolescents usually occurs at the expense of milk consumption which contains vitamin D [49]. As a result, it  
13 has been proposed that the availability of vitamin D-fortified juices may help reduce vitamin D deficiency in  
14 adolescents [33]. In our data those who consumed sugary drinks were less likely to consume milk (data not  
15 shown). Although milk consumption was not related to vitamin D deficiency it was significantly related to the  
16 vitamin D level in linear regression analysis.  
17  
18  
19  
20  
21  
22  
23  
24  
25

26 We found an association between passive smoking at household (reported by parents) and vitamin D  
27 deficiency among adolescents, which is interesting and has been reported before [45]. Only less than 1% of  
28 the adolescents in our setting reported active smoking. Smoking has also been reported to be a significant  
29 determinant for low vitamin D levels among adults in some studies [32] but not in others [50] and this issue  
30 remains controversial [32]. Furthermore, a recent study found no significant association between cotinine  
31 level and vitamin D deficiency among Korean adolescents [36]. One of the hypothesized mechanism is that  
32 smoking may reflect an overall less healthy life style including less physical activity and poor dietary habits  
33 [32]. A causal link has also been proposed as metabolites in cigarette's smoke can inhibit CYP27A1 activity  
34 [51], which is involved in vitamin D metabolism.  
35  
36  
37  
38  
39  
40  
41  
42  
43  
44  
45

#### 46 Strengths and limitation

47  
48 This is the first study that measured vitamin D in a large nationally representative sample of adolescents in  
49 Kuwait. We used a measurement method that is recommended in epidemiological studies and gathered  
50 data from both parents and adolescents. However, we did not measure the skin color, which can be an  
51  
52  
53  
54  
55



1  
2  
3 important determinant for vitamin D synthesis in the skin during exposure to sunlight. We evaluated the  
4 dietary intake of vitamin D in only a subgroup of study participants. However, dietary intake of vitamin D is  
5 known to have a smaller contribution to vitamin D status compared to cutaneous synthesis in response to  
6 sun exposure [43] and data on vitamin D supplement were obtained from all participants.  
7  
8  
9  
10

## 11 12 13 Conclusion

14  
15 In conclusion, a high prevalence of vitamin D deficiency was noted among adolescents in Kuwait despite the  
16 abundant sunshine. This may reflect strong sun avoidance behavior as only less than 4% of adolescents  
17 were vitamin D sufficient and most of them were on vitamin D supplements. An optimal vitamin D level is  
18 essential during adolescence; and vitamin D deficiency at this age represents a public health problem that  
19 should be addressed. First, our findings should help clear doubts on vitamin D deficiency among  
20 adolescents in Kuwait, which is a prerequisite for prevention initiatives. Second, sun exposure is the main  
21 source for vitamin D in this age group; therefore adequate outdoor daytime activities should be encouraged  
22 especially for females. Slight modifications in school environment to facilitate exposure to sunlight during  
23 school breaks between classes can be fruitful. With respect to vitamin D supplementation, we call for locally  
24 tailored guidelines in which females should have a higher amount of vitamin D supplement compared to  
25 males. Vitamin D fortification particularly for food products that are popular for adolescents in our setting  
26 should also be considered. Increasing exposure to sunlight and food fortification with vitamin D should not  
27 be considered mutually exclusive and both strategies can be adopted.  
28  
29  
30  
31  
32  
33  
34  
35  
36  
37  
38  
39  
40  
41  
42

## 43 Acknowledgements

44  
45 The authors acknowledge the assistance of Nadien Sameeh Rushdi and the team of data collectors. We  
46 also acknowledge the cooperation of all participating schools and the facilitation of the project by the  
47 Ministry of Education. We also appreciate the support and cooperation of the staff and management of The  
48 United Genetics Laboratories (Kuwait) in vitamin D analysis.  
49  
50  
51  
52  
53  
54  
55  
56  
57  
58  
59  
60

### **Authors' contributions**

AT contributed to the study design and data collection, analyzed the data and drafted the paper. He had full access to all the data and took responsibility for the integrity of the data. AR contributed to the design of the study and data collection in addition to the writing and revising the manuscript. RS and LS contributed to the design of the study and data collection in addition to revising the manuscript with significant intellectual input. AH contributed to the data collection and revised the manuscript.

**Funding:** The work was supported and funded by Kuwait University- Research Project No. WF 02/13.

**Competing interests:** The authors declare that they have no competing interests

**Data sharing statement:** No additional data are available.

## References

1. Mouratidou T, Vicente-Rodriguez G, Gracia-Marco L, et al. Associations of dietary calcium, vitamin D, milk intakes, and 25-hydroxyvitamin D with bone mass in Spanish adolescents: the HELENA study. *Journal of clinical densitometry : the official journal of the International Society for Clinical Densitometry* 2013;**16**(1):110-7 doi: 10.1016/j.jocd.2012.07.008[published Online First: Epub Date]].
2. Sharief S, Jariwala S, Kumar J, Muntner P, Melamed ML. Vitamin D levels and food and environmental allergies in the United States: results from the National Health and Nutrition Examination Survey 2005-2006. *The Journal of allergy and clinical immunology* 2011;**127**(5):1195-202 doi: 10.1016/j.jaci.2011.01.017[published Online First: Epub Date]].
3. Lucato P, Solmi M, Maggi S, et al. Low vitamin D levels increase the risk of type 2 diabetes in older adults: A systematic review and meta-analysis. *Maturitas* 2017;**100**:8-15 doi: 10.1016/j.maturitas.2017.02.016[published Online First: Epub Date]].
4. Bahrami A, Mazloun SR, Maghsoudi S, et al. High Dose Vitamin D Supplementation Is Associated With a Reduction in Depression Score Among Adolescent Girls: A Nine-Week Follow-Up Study. *Journal of dietary supplements* 2017:1-10 doi: 10.1080/19390211.2017.1334736[published Online First: Epub Date]].
5. Chowdhury R, Kunutsor S, Vitezova A, et al. Vitamin D and risk of cause specific death: systematic review and meta-analysis of observational cohort and randomised intervention studies. *BMJ (Clinical research ed.)* 2014;**348**:g1903 doi: 10.1136/bmj.g1903[published Online First: Epub Date]].
6. Bjelakovic G, Gluud LL, Nikolova D, et al. Vitamin D supplementation for prevention of cancer in adults. *The Cochrane database of systematic reviews* 2014(6):CD007469 doi: 10.1002/14651858.CD007469.pub2[published Online First: Epub Date]].
7. Riverin BD, Maguire JL, Li P. Vitamin D Supplementation for Childhood Asthma: A Systematic Review and Meta-Analysis. *PloS one* 2015;**10**(8):e0136841 doi: 10.1371/journal.pone.0136841[published Online First: Epub Date]].
8. Swart KM, Lips P, Brouwer IA, et al. Effects of vitamin D supplementation on markers for cardiovascular disease and type 2 diabetes: an individual participant data meta-analysis of randomized controlled trials. *The American journal of clinical nutrition* 2018;**107**(6):1043-53 doi: 10.1093/ajcn/nqy078[published Online First: Epub Date]].
9. Shaffer JA, Edmondson D, Wasson LT, et al. Vitamin D supplementation for depressive symptoms: a systematic review and meta-analysis of randomized controlled trials. *Psychosomatic medicine* 2014;**76**(3):190-6 doi: 10.1097/psy.000000000000044[published Online First: Epub Date]].
10. Bjelakovic G, Gluud LL, Nikolova D, et al. Vitamin D supplementation for prevention of mortality in adults. *The Cochrane database of systematic reviews* 2014(1):CD007470 doi: 10.1002/14651858.CD007470.pub3[published Online First: Epub Date]].
11. Hilger J, Friedel A, Herr R, et al. A systematic review of vitamin D status in populations worldwide. *The British journal of nutrition* 2014;**111**(1):23-45 doi: 10.1017/s0007114513001840[published Online First: Epub Date]].
12. Basatemur E, Horsfall L, Marston L, Rait G, Sutcliffe A. Trends in the Diagnosis of Vitamin D Deficiency. *Pediatrics* 2017;**139**(3) doi: 10.1542/peds.2016-2748[published Online First: Epub Date]].
13. Garg MK, Marwaha RK, Khadgawat R, et al. Efficacy of vitamin D loading doses on serum 25-hydroxy vitamin D levels in school going adolescents: an open label non-randomized prospective trial. *Journal of pediatric endocrinology & metabolism : JPEM* 2013;**26**(5-6):515-23 doi: 10.1515/jpem-2012-0390[published Online First: Epub Date]].

- 1  
2  
3 14. Kapil U, Pandey RM, Goswami R, et al. Prevalence of Vitamin D deficiency and associated risk factors among  
4 children residing at high altitude in Shimla district, Himachal Pradesh, India. *Indian journal of endocrinology and*  
5 *metabolism* 2017;**21**(1):178-83 doi: 10.4103/2230-8210.196031[published Online First: Epub Date]].  
6  
7 15. AlBuhairan FS, Tamim H, Al Dubayee M, et al. Time for an Adolescent Health Surveillance System in Saudi  
8 Arabia: Findings From "Jeeluna". *The Journal of adolescent health : official publication of the Society for Adolescent*  
9 *Medicine* 2015;**57**(3):263-9 doi: 10.1016/j.jadohealth.2015.06.009[published Online First: Epub Date]].  
10  
11 16. Kaddam IM, Al-Shaikh AM, Abaalkhail BA, et al. Prevalence of vitamin D deficiency and its associated factors in  
12 three regions of Saudi Arabia. *Saudi medical journal* 2017;**38**(4):381-90 doi: 10.15537/smj.2017.4.18753[published  
13 Online First: Epub Date]].  
14  
15 17. Mansour MM, Alhadidi KM. Vitamin D deficiency in children living in Jeddah, Saudi Arabia. *Indian journal of*  
16 *endocrinology and metabolism* 2012;**16**(2):263-9 doi: 10.4103/2230-8210.93746[published Online First: Epub Date]].  
17  
18 18. Valtuena J, Gonzalez-Gross M, Huybrechts I, et al. Factors associated with vitamin D deficiency in European  
19 adolescents: the HELENA study. *Journal of nutritional science and vitaminology* 2013;**59**(3):161-71  
20  
21 19. Glanz K, Yaroch AL, Dancel M, et al. Measures of sun exposure and sun protection practices for behavioral and  
22 epidemiologic research. *Archives of dermatology* 2008;**144**(2):217-22 doi: 10.1001/archdermatol.2007.46[published  
23 Online First: Epub Date]].  
24  
25 20. UEA. Youth Physical Activity Questionnaire. Secondary Youth Physical Activity Questionnaire 2011. [http://epi-](http://epi-meta.medschl.cam.ac.uk/includes/speedy/pdf/PhysicalActivity%20V4%20SPEEDY-3.pdf)  
26 [meta.medschl.cam.ac.uk/includes/speedy/pdf/PhysicalActivity%20V4%20SPEEDY-3.pdf](http://epi-meta.medschl.cam.ac.uk/includes/speedy/pdf/PhysicalActivity%20V4%20SPEEDY-3.pdf).  
27  
28 21. Al-Hazzaa HM, Al-Sobayel HI, Musaiger AO. Convergent validity of the Arab Teens Lifestyle Study (ATLS) physical  
29 activity questionnaire. *International journal of environmental research and public health* 2011;**8**(9):3810-20 doi:  
30 10.3390/ijerph8093810[published Online First: Epub Date]].  
31  
32 22. Taylor C, Lamparello B, Kruczek K, Anderson EJ, Hubbard J, Misra M. Validation of a food frequency questionnaire  
33 for determining calcium and vitamin D intake by adolescent girls with anorexia nervosa. *Journal of the American*  
34 *Dietetic Association* 2009;**109**(3):479-85, 85 e1-3 doi: 10.1016/j.jada.2008.11.025[published Online First: Epub Date]].  
35  
36 23. Papandreou D, achaniotis N, Lari M, Al Mussabi W. Validation of a Food Frequency Questionnaire for Vitamin D  
37 and Calcium Intake in Healthy Female College Students. *Food and Nutrition Sciences* 2014;**5**:2048-52  
38  
39 24. Holick MF. Vitamin D deficiency. *The New England journal of medicine* 2007;**357**(3):266-81 doi:  
40 10.1056/NEJMra070553[published Online First: Epub Date]].  
41  
42 25. Vogeser M. Quantification of circulating 25-hydroxyvitamin D by liquid chromatography-tandem mass spectrometry.  
43 *The Journal of steroid biochemistry and molecular biology* 2010;**121**(3-5):565-73 doi:  
44 10.1016/j.jsbmb.2010.02.025[published Online First: Epub Date]].  
45  
46 26. Holick MF, Binkley NC, Bischoff-Ferrari HA, et al. Evaluation, treatment, and prevention of vitamin D deficiency: an  
47 Endocrine Society clinical practice guideline. *The Journal of clinical endocrinology and metabolism* 2011;**96**(7):1911-30  
48 doi: 10.1210/jc.2011-0385[published Online First: Epub Date]].  
49  
50 27. Medicine SfAHa. Recommended vitamin D intake and management of low vitamin D status in adolescents: a  
51 position statement of the society for adolescent health and medicine. *The Journal of adolescent health : official*  
52 *publication of the Society for Adolescent Medicine* 2013;**52**(6):801-3 doi: 10.1016/j.jadohealth.2013.03.022[published  
53 Online First: Epub Date]].  
54  
55  
56  
57  
58  
59  
60

- 1  
2  
3 28. Braegger C, Campoy C, Colomb V, et al. Vitamin D in the healthy European paediatric population. *Journal of*  
4 *pediatric gastroenterology and nutrition* 2013;**56**(6):692-701 doi: 10.1097/MPG.0b013e31828f3c05[published Online  
5 First: Epub Date]].  
6  
7 29. Vierucci F, Del Pistoia M, Fanos M, Erba P, Saggese G. Prevalence of hypovitaminosis D and predictors of vitamin  
8 D status in Italian healthy adolescents. *Italian journal of pediatrics* 2014;**40**:54 doi: 10.1186/1824-7288-40-54[published  
9 Online First: Epub Date]].  
10  
11 30. Gonzalez-Gross M, Valtuena J, Breidenassel C, et al. Vitamin D status among adolescents in Europe: the Healthy  
12 Lifestyle in Europe by Nutrition in Adolescence study. *The British journal of nutrition* 2012;**107**(5):755-64 doi:  
13 10.1017/s0007114511003527[published Online First: Epub Date]].  
14  
15 31. Vierucci F, Del Pistoia M, Fanos M, et al. Vitamin D status and predictors of hypovitaminosis D in Italian children  
16 and adolescents: a cross-sectional study. *European journal of pediatrics* 2013;**172**(12):1607-17 doi: 10.1007/s00431-  
17 013-2119-z[published Online First: Epub Date]].  
18  
19 32. Kassi EN, Stavropoulos S, Kokkoris P, et al. Smoking is a significant determinant of low serum vitamin D in young  
20 and middle-aged healthy males. *Hormones (Athens, Greece)* 2015;**14**(2):245-50 doi:  
21 10.14310/horm.2002.1521[published Online First: Epub Date]].  
22  
23 33. Gordon CM, DePeter KC, Feldman HA, Grace E, Emans SJ. Prevalence of vitamin D deficiency among healthy  
24 adolescents. *Archives of pediatrics & adolescent medicine* 2004;**158**(6):531-7 doi:  
25 10.1001/archpedi.158.6.531[published Online First: Epub Date]].  
26  
27 34. Dong Y, Pollock N, Stallmann-Jorgensen IS, et al. Low 25-hydroxyvitamin D levels in adolescents: race, season,  
28 adiposity, physical activity, and fitness. *Pediatrics* 2010;**125**(6):1104-11 doi: 10.1542/peds.2009-2055[published Online  
29 First: Epub Date]].  
30  
31 35. Rockell JE, Green TJ, Skeaff CM, et al. Season and ethnicity are determinants of serum 25-hydroxyvitamin D  
32 concentrations in New Zealand children aged 5-14 y. *The Journal of nutrition* 2005;**135**(11):2602-8  
33  
34 36. Byun EJ, Heo J, Cho SH, Lee JD, Kim HS. Suboptimal vitamin D status in Korean adolescents: a nationwide study  
35 on its prevalence, risk factors including cotinine-verified smoking status and association with atopic dermatitis and  
36 asthma. *BMJ open* 2017;**7**(7):e016409 doi: 10.1136/bmjopen-2017-016409[published Online First: Epub Date]].  
37  
38 37. Zhang FF, Al Hooti S, Al Zenki S, et al. Vitamin D deficiency is associated with high prevalence of diabetes in  
39 Kuwaiti adults: results from a national survey. *BMC public health* 2016;**16**:100 doi: 10.1186/s12889-016-2758-  
40 x[published Online First: Epub Date]].  
41  
42 38. Al-Daghri NM. Vitamin D in Saudi Arabia: Prevalence, distribution and disease associations. *The Journal of steroid*  
43 *biochemistry and molecular biology* 2016 doi: 10.1016/j.jsmb.2016.12.017[published Online First: Epub Date]].  
44  
45 39. Golbahar J, Al-Saffar N, Altayab Diab D, Al-Othman S, Darwish A, Al-Kafaji G. Predictors of vitamin D deficiency  
46 and insufficiency in adult Bahrainis: a cross-sectional study. *Public health nutrition* 2014;**17**(4):732-8 doi:  
47 10.1017/s136898001300030x[published Online First: Epub Date]].  
48  
49 40. Mahdy S, Al-Emadi SA, Khanjar IA, et al. Vitamin D status in health care professionals in Qatar. *Saudi medical*  
50 *journal* 2010;**31**(1):74-7  
51  
52 41. Sulimani RA, Mohammed AG, Alfadda AA, et al. Vitamin D deficiency and biochemical variations among urban  
53 Saudi adolescent girls according to season. *Saudi medical journal* 2016;**37**(9):1002-8 doi:  
54 10.15537/smj.2016.9.15248[published Online First: Epub Date]].  
55  
56  
57  
58  
59  
60

- 1  
2  
3 42. Thalib L, Al-Taiar A. Dust storms and the risk of asthma admissions to hospitals in Kuwait. *The Science of the total environment* 2012;**433**:347-51 doi: 10.1016/j.scitotenv.2012.06.082[published Online First: Epub Date]].
- 4  
5  
6 43. Holick MF. The D-lightful vitamin D for child health. *JPEN. Journal of parenteral and enteral nutrition* 2012;**36**(1 Suppl):9S-19S doi: 10.1177/0148607111430189[published Online First: Epub Date]].
- 7  
8  
9 44. Al-Daghri NM, Al-Saleh Y, Aljohani N, et al. Vitamin D Deficiency and Cardiometabolic Risks: A Juxtaposition of Arab Adolescents and Adults. *PloS one* 2015;**10**(7):e0131315 doi: 10.1371/journal.pone.0131315[published Online First: Epub Date]].
- 10  
11  
12  
13 45. Yao TC, Tu YL, Chang SW, et al. Suboptimal vitamin D status in a population-based study of Asian children: prevalence and relation to allergic diseases and atopy. *PloS one* 2014;**9**(6):e99105 doi: 10.1371/journal.pone.0099105[published Online First: Epub Date]].
- 14  
15  
16  
17 46. Wortsman J, Matsuoka LY, Chen TC, Lu Z, Holick MF. Decreased bioavailability of vitamin D in obesity. *The American journal of clinical nutrition* 2000;**72**(3):690-3
- 18  
19  
20 47. Walker GE, Ricotti R, Roccio M, et al. Pediatric obesity and vitamin D deficiency: a proteomic approach identifies multimeric adiponectin as a key link between these conditions. *PloS one* 2014;**9**(1):e83685 doi: 10.1371/journal.pone.0083685[published Online First: Epub Date]].
- 21  
22  
23  
24 48. Tsuji K, Maeda T, Kawane T, Matsunuma A, Horiuchi N. Leptin stimulates fibroblast growth factor 23 expression in bone and suppresses renal 1alpha,25-dihydroxyvitamin D3 synthesis in leptin-deficient mice. *J Bone Miner Res* 2010;**25**(8):1711-23 doi: 10.1002/jbmr.65[published Online First: Epub Date]].
- 25  
26  
27  
28 49. O'Connor TM, Yang SJ, Nicklas TA. Beverage intake among preschool children and its effect on weight status. *Pediatrics* 2006;**118**(4):e1010-8 doi: 10.1542/peds.2005-2348[published Online First: Epub Date]].
- 29  
30  
31 50. Scragg R, Holdaway I, Jackson R, Lim T. Plasma 25-hydroxyvitamin D3 and its relation to physical activity and other heart disease risk factors in the general population. *Annals of epidemiology* 1992;**2**(5):697-703
- 32  
33  
34 51. Aboraia AS, Makowski B, Bahja A, et al. Synthesis and CYP24A1 inhibitory activity of (E)-2-(2-substituted benzylidene)- and 2-(2-substituted benzyl)-6-methoxy-tetralones. *European journal of medicinal chemistry* 2010;**45**(10):4427-34 doi: 10.1016/j.ejmech.2010.07.001[published Online First: Epub Date]].
- 35  
36  
37  
38  
39  
40  
41  
42  
43  
44  
45  
46  
47  
48  
49  
50  
51  
52  
53  
54  
55

## Figure legends

**Figure (1):** Parathyroid hormone (PTH) with Serum 25-hydroxyvitamin D (25-OH-D) concentration. Individuals above the horizontal line ( $\text{PTH} \geq 65.0 \text{ ng/L}$ ) are adolescents with secondary hyperthyroidism. Vertical lines represent the 25-OH-D cut-off used to define vitamin D deficiency, insufficiency and sufficiency (seven participants with  $25\text{-OH-D} > 150 \text{ nmol/L}$  were omitted).

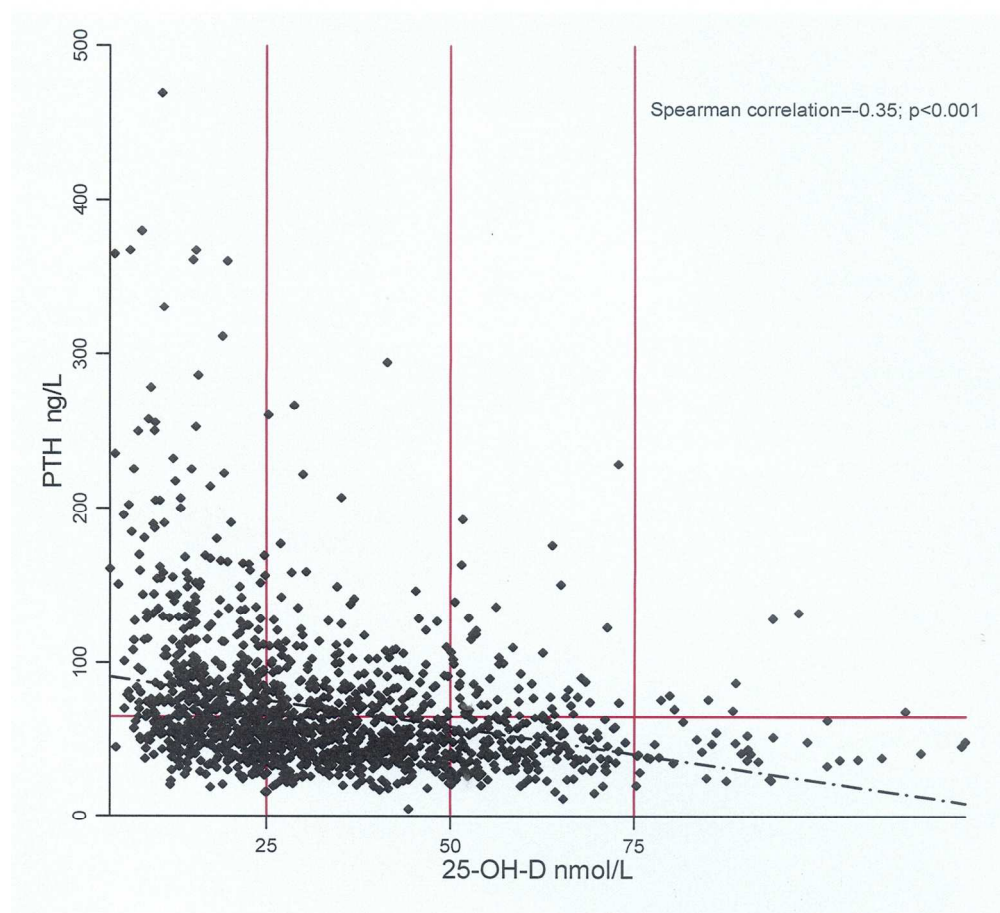

Figure (1): Parathyroid hormone (PTH) with Serum 25-hydroxyvitamin D (25-OH-D) concentration. Individuals above the horizontal line (PTH  $\geq$  65.0 ng/L) are adolescents with secondary hyperthyroidism. Vertical lines represent the 25-OH-D cut-off used to define vitamin D deficiency, insufficiency and sufficiency (seven participants with 25-OH-D > 150 nmol/L were omitted).

138x127mm (300 x 300 DPI)



Supplementary Table (1). Factors associated with vitamin D deficiency among adolescents in univariate analysis.

| Characteristics                          | Total<br>n=1150 | Prevalence of<br>vitamin D<br>deficiency<br>(%) | Prevalence Ratio<br>[95%CI] | p      |
|------------------------------------------|-----------------|-------------------------------------------------|-----------------------------|--------|
| <b>Gender</b>                            |                 |                                                 |                             |        |
| Male                                     | 694             | 488 (70.32)                                     | 1 [Ref.]                    | <0.001 |
| Female                                   | 722             | 662 (91.69)                                     | 1.30 [1.26- 1.33]           |        |
| <b>Age (year)</b>                        |                 |                                                 |                             |        |
| <12                                      | 527             | 409 (77.61)                                     | 1 [Ref.]                    | 0.024  |
| 12-                                      | 439             | 369 (84.05)                                     | 1.07 [1.01- 1.12]           |        |
| ≥13                                      | 450             | 372 (82.67)                                     | 1.06 [1.00- 1.10]           |        |
| <b>Nationality</b>                       |                 |                                                 |                             |        |
| Kuwaiti                                  | 1081            | 900 (83.26)                                     | 1 [Ref.]                    | <0.001 |
| Non-Kuwait                               | 335             | 250 (74.63)                                     | 0.90 [0.82-0.96]            |        |
| <b>Governorate</b>                       |                 |                                                 |                             |        |
| Capital                                  | 156             | 127 (81.41)                                     | 1 [Ref.]                    | 0.003  |
| Hawally                                  | 246             | 188 (76.42)                                     | 0.94 [0.82-1.03]            |        |
| Farawanya                                | 236             | 183 (77.54)                                     | 0.95 [0.83-1.04]            |        |
| Jahra                                    | 239             | 214 (89.54)                                     | 1.10 [1.02-1.15]            |        |
| Mubarak al-Kabeer                        | 148             | 124 (83.78)                                     | 1.03 [0.91-1.10]            |        |
| Ahmadi                                   | 371             | 296 (79.78)                                     | 0.98 [0.88-1.06]            |        |
| <b>Father's Education</b>                |                 |                                                 |                             |        |
| Primary/Intermediate/no formal education | 236             | 205 (86.86)                                     | 1 [Ref.]                    | <0.001 |
| Secondary (high school)                  | 344             | 297 (86.34)                                     | 0.99 [0.87-1.08]            |        |
| Diploma                                  | 261             | 220 (84.29)                                     | 0.95 [0.82-1.06]            |        |
| University & above                       | 542             | 399 (73.62)                                     | 0.78 [0.65-0.90]            |        |
| <b>Mother's Education</b>                |                 |                                                 |                             |        |
| Primary/Intermediate/no formal education | 183             | 153 (83.61)                                     | 1 [Ref.]                    | <0.001 |
| Secondary (high school)                  | 304             | 263 (86.51)                                     | 1.04 [0.94-1.12]            |        |
| Diploma                                  | 304             | 259 (85.20)                                     | 1.02 [0.91-1.10]            |        |
| University & above                       | 605             | 457 (75.54)                                     | 0.88 [0.76-0.99]            |        |
| <b>Total number of brother/sisters</b>   |                 |                                                 |                             |        |
| Zero-two                                 | 298             | 223 (74.83)                                     | 1 [Ref.]                    | 0.002  |
| Three-four                               | 538             | 434 (80.67)                                     | 1.05 [1.00-1.10]            |        |
| Five or more                             | 553             | 469 (84.81)                                     | 1.10 [1.04-1.13]            |        |
| <b>Passive smoking at household</b>      |                 |                                                 |                             |        |
| No                                       | 901             | 704 (78.14)                                     | 1 [Ref.]                    | <0.001 |
| Yes                                      | 489             | 426 (87.12)                                     | 1.11 [1.06-1.15]            |        |

|                                                               |       |               |      |             |  |        |
|---------------------------------------------------------------|-------|---------------|------|-------------|--|--------|
| <b>Times per week consumed breakfast not prepared at home</b> |       |               |      |             |  |        |
| Zero                                                          | 624   | 484 (77.56)   | 1    | [Ref.]      |  | 0.019  |
| One-two times                                                 | 569   | 478 (84.01)   | 1.08 | [1.02-1.12] |  |        |
| Three-four                                                    | 117   | 98 (83.76)    | 1.07 | [0.97-1.14] |  |        |
| Five or more                                                  | 78    | 67 (85.90)    | 1.10 | [1.00-1.17] |  |        |
| <b>Times per week consumed dinner not prepared at home</b>    |       |               |      |             |  |        |
| Zero                                                          | 157   | 114 (72.61)   | 1    | [Ref.]      |  | 0.018  |
| One-two times                                                 | 878   | 719 (81.89)   | 1.09 | [1.03-1.14] |  |        |
| Three-four                                                    | 257   | 211 (82.10)   | 1.09 | [1.01-1.15] |  |        |
| Five or more                                                  | 86    | 75 (87.21)    | 1.14 | [1.04-1.19] |  |        |
| <b>Consumption of sugary drinks per week</b>                  |       |               |      |             |  |        |
| None                                                          | 171   | 123 (71.93)   | 1    | [Ref.]      |  | 0.002  |
| Once-Three times                                              | 772   | 633 (81.99)   | 1.09 | [1.04-1.14] |  |        |
| Four-Six                                                      | 171   | 135 (78.95)   | 1.07 | [0.98-1.13] |  |        |
| Seven/more                                                    | 299   | 256 (85.62)   | 1.12 | [1.07-1.17] |  |        |
| <b>Currently taking supplements</b>                           |       |               |      |             |  |        |
| No                                                            | 1,256 | 1,045 (83.20) | 1    | [Ref.]      |  | <0.001 |
| Yes                                                           | 158   | 103 (65.19)   | 0.78 | [0.68-0.88] |  |        |
| <b>Number of times walking to school per week</b>             |       |               |      |             |  |        |
| None                                                          | 1,158 | 982 (84.80)   | 1    | [Ref.]      |  | <0.001 |
| 1-8 times                                                     | 155   | 99 (63.87)    | 0.74 | [0.63-0.83] |  |        |
| Every day                                                     | 103   | 69 (66.99)    | 0.77 | [0.65-0.89] |  |        |
| <b>Time walking to school</b>                                 |       |               |      |             |  |        |
| None                                                          | 1,158 | 982 (84.80)   | 1    | [Ref.]      |  | <0.001 |
| ≤5 minutes                                                    | 80    | 50 (62.50)    | 0.71 | [0.56-0.84] |  |        |
| 6- 10 minutes                                                 | 76    | 53 (69.74)    | 0.80 | [0.65-0.93] |  |        |
| 11-15                                                         | 56    | 38 (67.86)    | 0.77 | [0.60-0.92] |  |        |
| 16 minutes or more                                            | 45    | 26 (57.78)    | 0.65 | [0.46-0.82] |  |        |
| <b>Time spent on physical activity per week</b>               |       |               |      |             |  |        |
| Low (lower tertile)                                           | 469   | 396 (84.43)   | 1    | [Ref.]      |  | 0.005  |
| Medium (middle tertile)                                       | 473   | 391 (82.66)   | 0.97 | [0.89-1.04] |  |        |
| High (higher tertile)                                         | 474   | 363 (76.58)   | 0.89 | [0.80-0.96] |  |        |
| <b>Body Mass Index Categories<sup>1</sup></b>                 |       |               |      |             |  |        |
| Normal weight                                                 | 601   | 465 (77.37)   | 1    | [Ref.]      |  | 0.001  |
| Overweight                                                    | 320   | 270 (84.38)   | 1.07 | [1.02-1.11] |  |        |

|                                                         |       |             |      |             |        |
|---------------------------------------------------------|-------|-------------|------|-------------|--------|
| Obese                                                   | 471   | 400 (84.93) | 1.08 | [1.03-1.11] |        |
| Under weight                                            | 24    | 15 (62.50)  | 0.84 | [0.59-1.02] |        |
| <b>Time outside per day 10:00 am- 4:00 pm week days</b> |       |             |      |             |        |
| Less than 30 minutes                                    | 657   | 563 (85.69) | 1    | [Ref.]      | <0.001 |
| 31 minutes to 1 hour                                    | 450   | 342 (76.00) | 0.87 | [0.80-0.94] |        |
| More than 1 hour to 2 hours                             | 222   | 178 (80.18) | 0.93 | [0.84-1.00] |        |
| More than 2 hours                                       | 87    | 67 (77.01)  | 0.88 | [0.74-0.99] |        |
| <b>Time outside per day 10:00 am- 4:00 pm week ends</b> |       |             |      |             |        |
| Less than 30 minutes                                    | 494   | 425 (86.03) | 1    | [Ref.]      | 0.003  |
| 31 minutes to 1 hour                                    | 312   | 257 (82.37) | 0.94 | [0.85-1.02] |        |
| More than 1 hour to 2 hours                             | 255   | 198 (77.65) | 0.87 | [0.76-0.96] |        |
| More than 2 hours to 3 hours                            | 185   | 142 (76.76) | 0.85 | [0.74-0.96] |        |
| More than 3 hours                                       | 169   | 127 (75.15) | 0.83 | [0.71-0.94] |        |
| <b>Wearing sunscreen</b>                                |       |             |      |             |        |
| Never                                                   | 1,100 | 874 (79.45) | 1    | [Ref.]      | 0.013  |
| Rarely                                                  | 77    | 65 (84.42)  | 1.06 | [0.94-1.13] |        |
| Sometimes                                               | 160   | 140 (87.50) | 1.09 | [1.02-1.14] |        |
| Often/always                                            | 79    | 71 (89.87)  | 1.12 | [1.02-1.18] |        |
| <b>Staying in shade or under an umbrella</b>            |       |             |      |             |        |
| Never                                                   | 493   | 396 (80.32) | 1    | [Ref.]      | 0.04   |
| Rarely                                                  | 97    | 70 (72.16)  | 0.90 | [0.78-1.01] |        |
| Sometimes                                               | 363   | 301 (82.92) | 1.03 | [0.96-1.08] |        |
| Often                                                   | 205   | 162 (79.02) | 0.98 | [0.90-1.05] |        |
| Always                                                  | 257   | 220 (85.60) | 1.06 | [0.99-1.11] |        |

%s are row percentages. <sup>1</sup>according to WHO growth charts.

**STROBE 2007 (v4) checklist of items to be included in reports of observational studies in epidemiology\***  
**Checklist for cohort, case-control, and cross-sectional studies (combined)**

| Section/Topic             | Item # | Recommendation                                                                                                                                                                                                                                                                                                                                                                                                                                                         | Reported on page #          |
|---------------------------|--------|------------------------------------------------------------------------------------------------------------------------------------------------------------------------------------------------------------------------------------------------------------------------------------------------------------------------------------------------------------------------------------------------------------------------------------------------------------------------|-----------------------------|
| Title and abstract        | 1      | (a) Indicate the study's design with a commonly used term in the title or the abstract                                                                                                                                                                                                                                                                                                                                                                                 | Page 1                      |
|                           |        | (b) Provide in the abstract an informative and balanced summary of what was done and what was found                                                                                                                                                                                                                                                                                                                                                                    | Page 3                      |
| <b>Introduction</b>       |        |                                                                                                                                                                                                                                                                                                                                                                                                                                                                        |                             |
| Background/rationale      | 2      | Explain the scientific background and rationale for the investigation being reported                                                                                                                                                                                                                                                                                                                                                                                   | Page 5                      |
| Objectives                | 3      | State specific objectives, including any pre-specified hypotheses                                                                                                                                                                                                                                                                                                                                                                                                      | Page 5                      |
| <b>Methods</b>            |        |                                                                                                                                                                                                                                                                                                                                                                                                                                                                        |                             |
| Study design              | 4      | Present key elements of study design early in the paper                                                                                                                                                                                                                                                                                                                                                                                                                | Page 6                      |
| Setting                   | 5      | Describe the setting, locations, and relevant dates, including periods of recruitment, exposure, follow-up, and data collection                                                                                                                                                                                                                                                                                                                                        | Page 6- Page 8 and Page 14  |
| Participants              | 6      | (a) <i>Cohort study</i> —Give the eligibility criteria, and the sources and methods of selection of participants. Describe methods of follow-up<br><i>Case-control study</i> —Give the eligibility criteria, and the sources and methods of case ascertainment and control selection. Give the rationale for the choice of cases and controls<br><i>Cross-sectional study</i> —Give the eligibility criteria, and the sources and methods of selection of participants | Page 6                      |
|                           |        | (b) <i>Cohort study</i> —For matched studies, give matching criteria and number of exposed and unexposed<br><i>Case-control study</i> —For matched studies, give matching criteria and the number of controls per case                                                                                                                                                                                                                                                 |                             |
| Variables                 | 7      | Clearly define all outcomes, exposures, predictors, potential confounders, and effect modifiers. Give diagnostic criteria, if applicable                                                                                                                                                                                                                                                                                                                               | Page 6 and Page 7           |
| Data sources/ measurement | 8*     | For each variable of interest, give sources of data and details of methods of assessment (measurement). Describe comparability of assessment methods if there is more than one group                                                                                                                                                                                                                                                                                   | Page 6 and Page 7           |
| Bias                      | 9      | Describe any efforts to address potential sources of bias                                                                                                                                                                                                                                                                                                                                                                                                              | Page 6, Page 12 and Page 17 |
| Study size                | 10     | Explain how the study size was arrived at                                                                                                                                                                                                                                                                                                                                                                                                                              | Page 13                     |
| Quantitative variables    | 11     | Explain how quantitative variables were handled in the analyses. If applicable, describe which groupings were chosen and why                                                                                                                                                                                                                                                                                                                                           | Page 7 and Page 8           |
| Statistical methods       | 12     | (a) Describe all statistical methods, including those used to control for confounding                                                                                                                                                                                                                                                                                                                                                                                  | Page 7 and Page 8           |
|                           |        | (b) Describe any methods used to examine subgroups and interactions                                                                                                                                                                                                                                                                                                                                                                                                    | Page 7 and Page 8           |
|                           |        | (c) Explain how missing data were addressed                                                                                                                                                                                                                                                                                                                                                                                                                            | These were minimum.         |

|                          |     |                                                                                                                                                                                                                                                                                                           |                                                |
|--------------------------|-----|-----------------------------------------------------------------------------------------------------------------------------------------------------------------------------------------------------------------------------------------------------------------------------------------------------------|------------------------------------------------|
|                          |     | (d) <i>Cohort study</i> —If applicable, explain how loss to follow-up was addressed<br><i>Case-control study</i> —If applicable, explain how matching of cases and controls was addressed<br><i>Cross-sectional study</i> —If applicable, describe analytical methods taking account of sampling strategy | Page 8                                         |
|                          |     | (e) Describe any sensitivity analyses                                                                                                                                                                                                                                                                     |                                                |
| <b>Results</b>           |     |                                                                                                                                                                                                                                                                                                           |                                                |
| Participants             | 13* | (a) Report numbers of individuals at each stage of study—eg numbers potentially eligible, examined for eligibility, confirmed eligible, included in the study, completing follow-up, and analysed                                                                                                         | Page 8                                         |
|                          |     | (b) Give reasons for non-participation at each stage                                                                                                                                                                                                                                                      | Page 8                                         |
|                          |     | (c) Consider use of a flow diagram                                                                                                                                                                                                                                                                        |                                                |
| Descriptive data         | 14* | (a) Give characteristics of study participants (eg demographic, clinical, social) and information on exposures and potential confounders                                                                                                                                                                  | Table 1 page 9                                 |
|                          |     | (b) Indicate number of participants with missing data for each variable of interest                                                                                                                                                                                                                       | Table 1 , Table 2 and also supplementary table |
|                          |     | (c) <i>Cohort study</i> —Summarise follow-up time (eg, average and total amount)                                                                                                                                                                                                                          |                                                |
| Outcome data             | 15* | <i>Cohort study</i> —Report numbers of outcome events or summary measures over time                                                                                                                                                                                                                       |                                                |
|                          |     | <i>Case-control study</i> —Report numbers in each exposure category, or summary measures of exposure                                                                                                                                                                                                      |                                                |
|                          |     | <i>Cross-sectional study</i> —Report numbers of outcome events or summary measures                                                                                                                                                                                                                        | Page 10                                        |
| Main results             | 16  | (a) Give unadjusted estimates and, if applicable, confounder-adjusted estimates and their precision (eg, 95% confidence interval). Make clear which confounders were adjusted for and why they were included                                                                                              |                                                |
|                          |     | (b) Report category boundaries when continuous variables were categorized                                                                                                                                                                                                                                 | All tables                                     |
|                          |     | (c) If relevant, consider translating estimates of relative risk into absolute risk for a meaningful time period                                                                                                                                                                                          |                                                |
| Other analyses           | 17  | Report other analyses done—eg analyses of subgroups and interactions, and sensitivity analyses                                                                                                                                                                                                            | Page 12                                        |
| <b>Discussion</b>        |     |                                                                                                                                                                                                                                                                                                           |                                                |
| Key results              | 18  | Summarise key results with reference to study objectives                                                                                                                                                                                                                                                  | Page 13                                        |
| Limitations              | 19  | Discuss limitations of the study, taking into account sources of potential bias or imprecision. Discuss both direction and magnitude of any potential bias                                                                                                                                                | Page 16                                        |
| Interpretation           | 20  | Give a cautious overall interpretation of results considering objectives, limitations, multiplicity of analyses, results from similar studies, and other relevant evidence                                                                                                                                | Page 17                                        |
| Generalisability         | 21  | Discuss the generalisability (external validity) of the study results                                                                                                                                                                                                                                     | Page 17                                        |
| <b>Other information</b> |     |                                                                                                                                                                                                                                                                                                           |                                                |
| Funding                  | 22  | Give the source of funding and the role of the funders for the present study and, if applicable, for the original study on which the present article is based                                                                                                                                             | Page 18                                        |

1  
2  
3  
4 \*Give information separately for cases and controls in case-control studies and, if applicable, for exposed and unexposed groups in cohort and cross-sectional studies.

5 **Note:** An Explanation and Elaboration article discusses each checklist item and gives methodological background and published examples of transparent reporting. The STROBE  
6 checklist is best used in conjunction with this article (freely available on the Web sites of PLoS Medicine at <http://www.plosmedicine.org/>, Annals of Internal Medicine at  
7 <http://www.annals.org/>, and Epidemiology at <http://www.epidem.com/>). Information on the STROBE Initiative is available at [www.strobe-statement.org](http://www.strobe-statement.org).

8  
9  
10  
11  
12  
13  
14  
15  
16  
17  
18  
19  
20  
21  
22  
23  
24  
25  
26  
27  
28  
29  
30  
31  
32  
33  
34  
35  
36  
37  
38  
39  
40  
41  
42  
43  
44  
45  
46  
47

For peer review only
